# Supplementary material for: A core microbiota dominates a rich microbial diversity in the bovine udder and may indicate presence of dysbiosis
Source: PubMed Central journal article supplement (PMC7729973; doi:10.1038/s41598-020-77054-6), 2020-12-10

**Distance between cows**

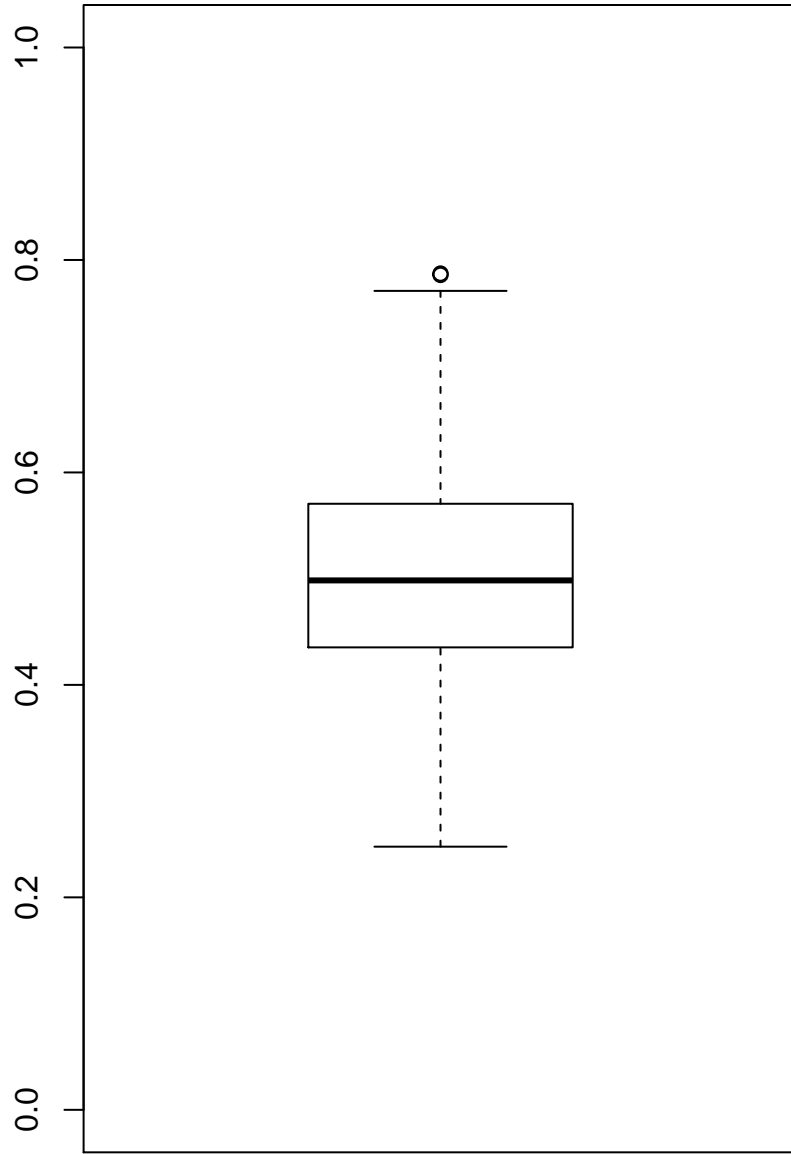

**Distances within cows**

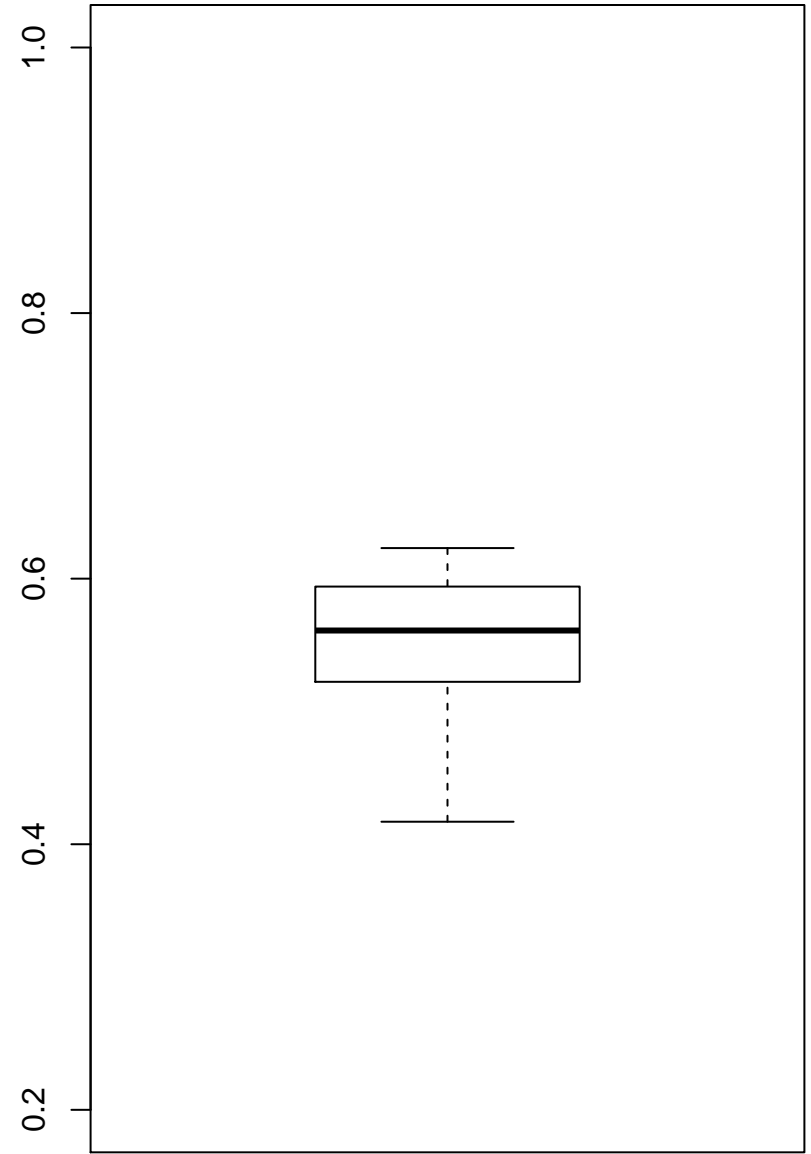

Supplement: 41598_2020_77054_MOESM2_ESM.pdf [file 41598_2020_77054_MOESM2_ESM.pdf]
