# Supplementary material for: A core microbiota dominates a rich microbial diversity in the bovine udder and may indicate presence of dysbiosis
Source: PubMed Central journal article supplement (PMC7729973; doi:10.1038/s41598-020-77054-6), 2020-12-10
Supplement: 41598_2020_77054_MOESM3_ESM.pdf [file 41598_2020_77054_MOESM3_ESM.pdf]

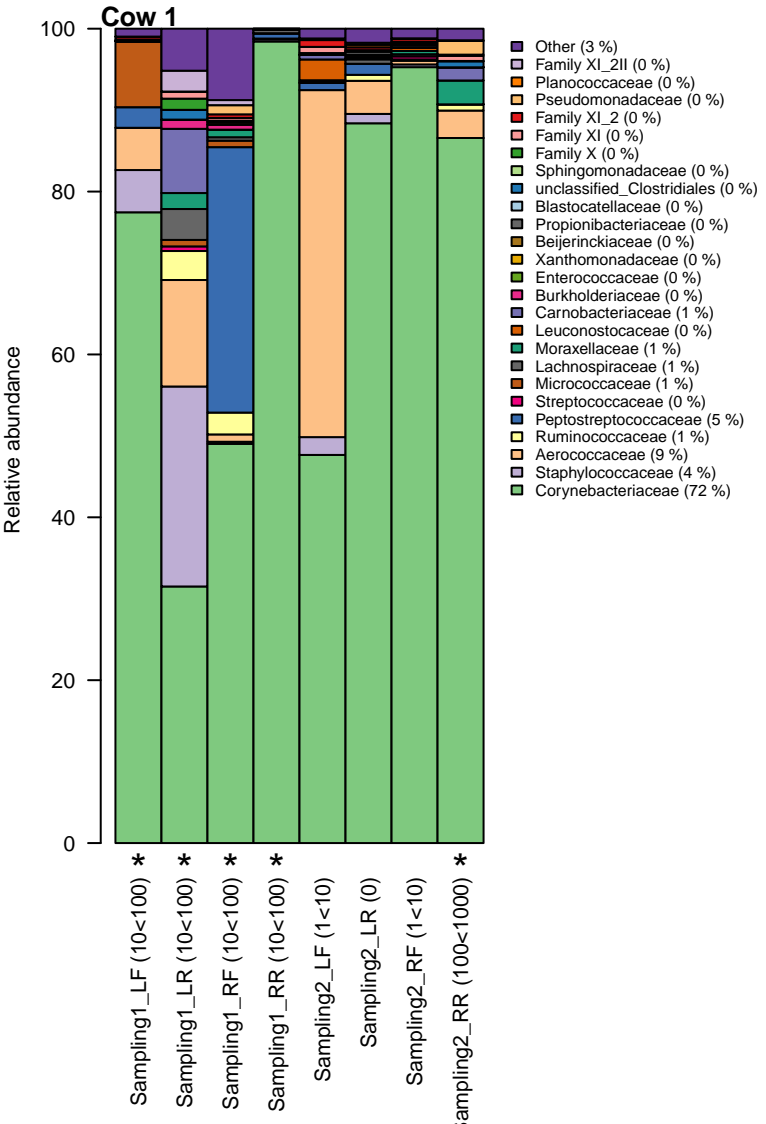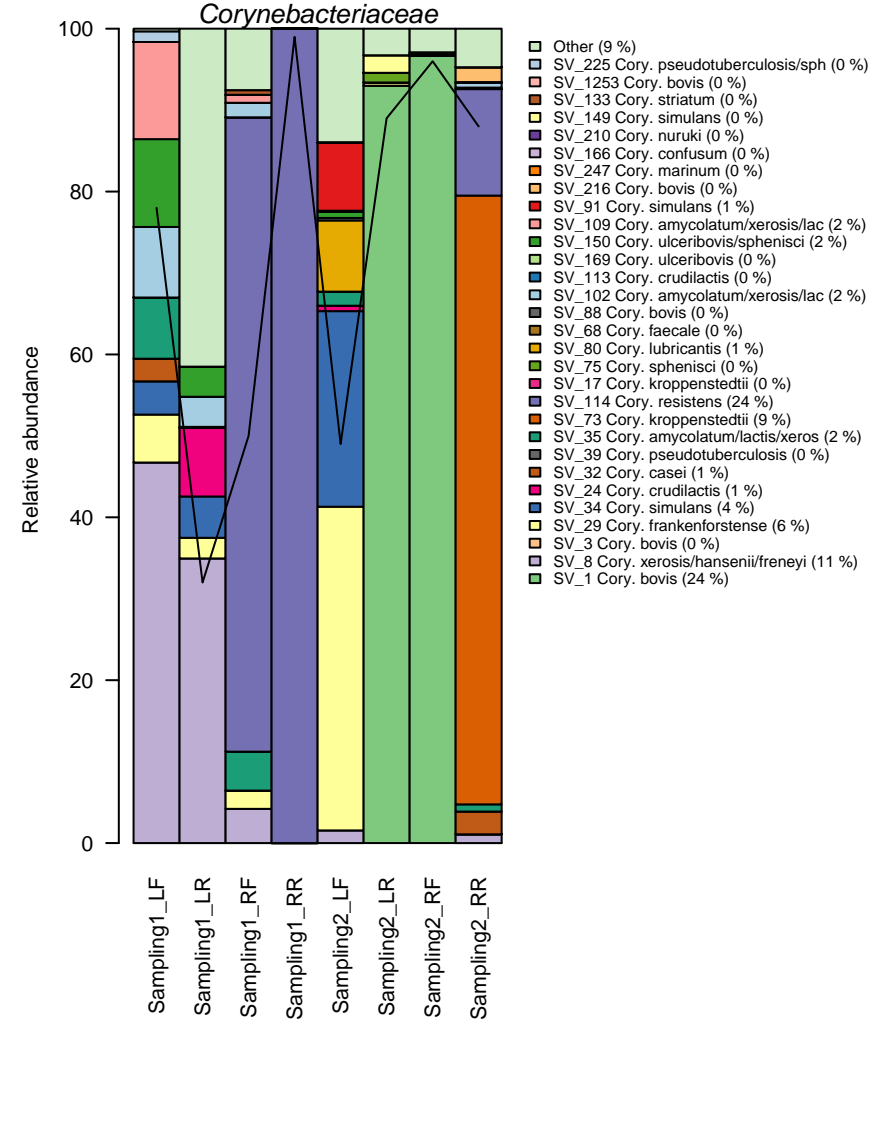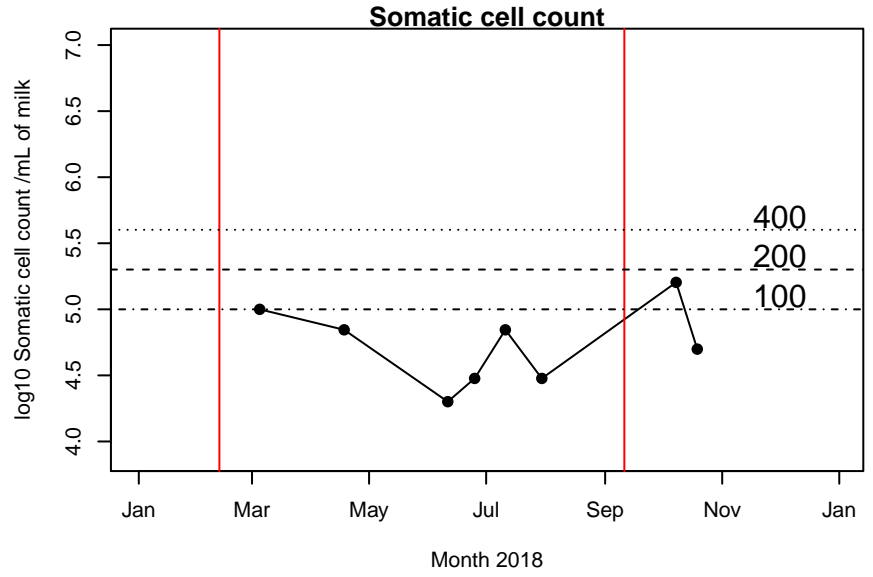

|                                    | # quarter | Sampling 1 | Sampling 2 |
|------------------------------------|-----------|------------|------------|
| <b>Aerococcus viridans</b>         | 4         | 6          | 2          |
| <b>Bacillus licheniformis</b>      | 1         | 1          | 0          |
| <b>Bacillus pumilus</b>            | 2         | 2          | 0          |
| <b>Corynebacterium amycolatum</b>  | 2         | 2          | 1          |
| <b>Corynebacterium sp</b>          | 1         | 1          | 0          |
| <b>Corynebacterium xerosis</b>     | 1         | 1          | 0          |
| <b>Staphylococcus epidermidis</b>  | 4         | 4          | 0          |
| <b>Staphylococcus haemolyticus</b> | 1         | 1          | 0          |
| <b>Staphylococcus hominis</b>      | 1         | 0          | 1          |

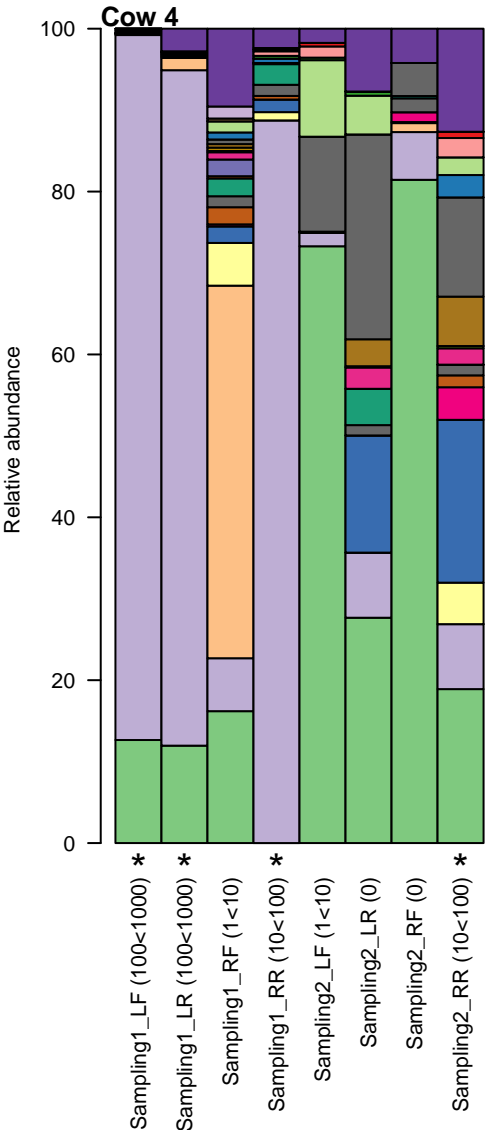

- Other (5%)
- Family XI\_2II (0%)
- Planococcaceae (0%)
- Pseudomonadaceae (0%)
- Family XI\_2 (0%)
- Family XI (1%)
- Family X (0%)
- Sphingomonadaceae (2%)
- unclassified\_Clostridiales (1%)
- Blastocatellaceae (0%)
- Propionibacteriaceae (7%)
- Beijerinckiaceae (1%)
- Xanthomonadaceae (0%)
- Enterococcaceae (0%)
- Burkholderiaceae (1%)
- Carnobacteriaceae (0%)
- Leuconostocaceae (0%)
- Moraxellaceae (1%)
- Lachnospiraceae (1%)
- Micrococcaceae (1%)
- Streptococcaceae (1%)
- Peptostreptococcaceae (5%)
- Ruminococcaceae (1%)
- Aerococcaceae (6%)
- Staphylococcaceae (36%)
- Corynebacteriaceae (30%)

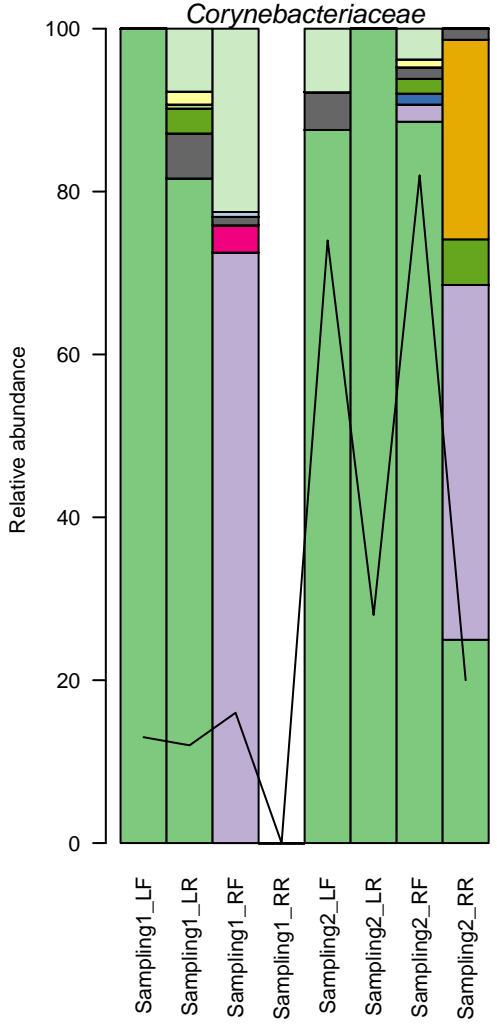

- Other (6%)
- SV\_225 Cory. pseudotuberculosis/sph (0%)
- SV\_1253 Cory. bovis (0%)
- SV\_133 Cory. striatum (0%)
- SV\_149 Cory. simulans (0%)
- SV\_210 Cory. nuruki (0%)
- SV\_166 Cory. confusum (0%)
- SV\_247 Cory. marinum (0%)
- SV\_216 Cory. bovis (0%)
- SV\_91 Cory. simulans (0%)
- SV\_109 Cory. amycolatum/xerosis/lac (0%)
- SV\_150 Cory. ulceribovis/sphenisci (0%)
- SV\_169 Cory. ulceribovis (0%)
- SV\_113 Cory. crudilactis (0%)
- SV\_102 Cory. amycolatum/xerosis/lac (0%)
- SV\_88 Cory. bovis (1%)
- SV\_68 Cory. faecale (0%)
- SV\_80 Cory. lubricantis (4%)
- SV\_75 Cory. sphenisci (1%)
- SV\_17 Cory. kroppenstedtii (0%)
- SV\_114 Cory. resistens (0%)
- SV\_73 Cory. kroppenstedtii (0%)
- SV\_35 Cory. amycolatum/lactis/xeros (0%)
- SV\_39 Cory. pseudotuberculosis (1%)
- SV\_32 Cory. casei (0%)
- SV\_24 Cory. crudilactis (0%)
- SV\_34 Cory. simulans (0%)
- SV\_29 Cory. frankenforstense (0%)
- SV\_3 Cory. bovis (0%)
- SV\_8 Cory. xerosis/hanseniifreneyi (17%)
- SV\_1 Cory. bovis (69%)

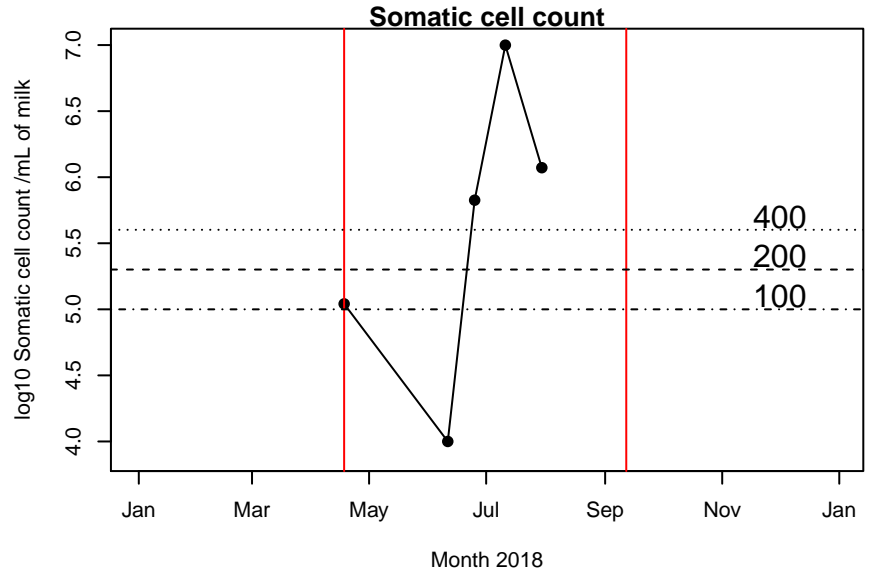

|                                    | # quarter | Sampling 1 | Sampling 2 |
|------------------------------------|-----------|------------|------------|
| <b>Aerococcus viridans</b>         | 3         | 3          | 0          |
| <b>Staphylococcus haemolyticus</b> | 1         | 0          | 1          |
| <b>Staphylococcus epidermidis</b>  | 3         | 12         | 0          |
| <b>Staphylococcus haemolyticus</b> | 4         | 4          | 4          |

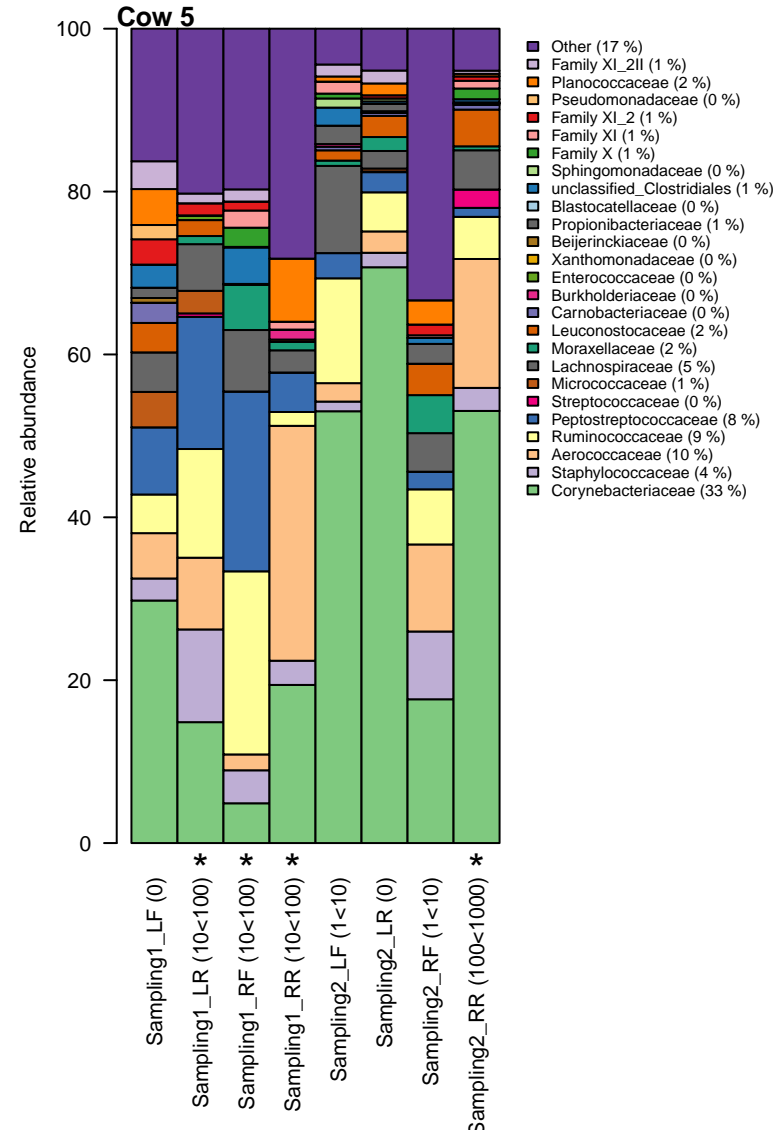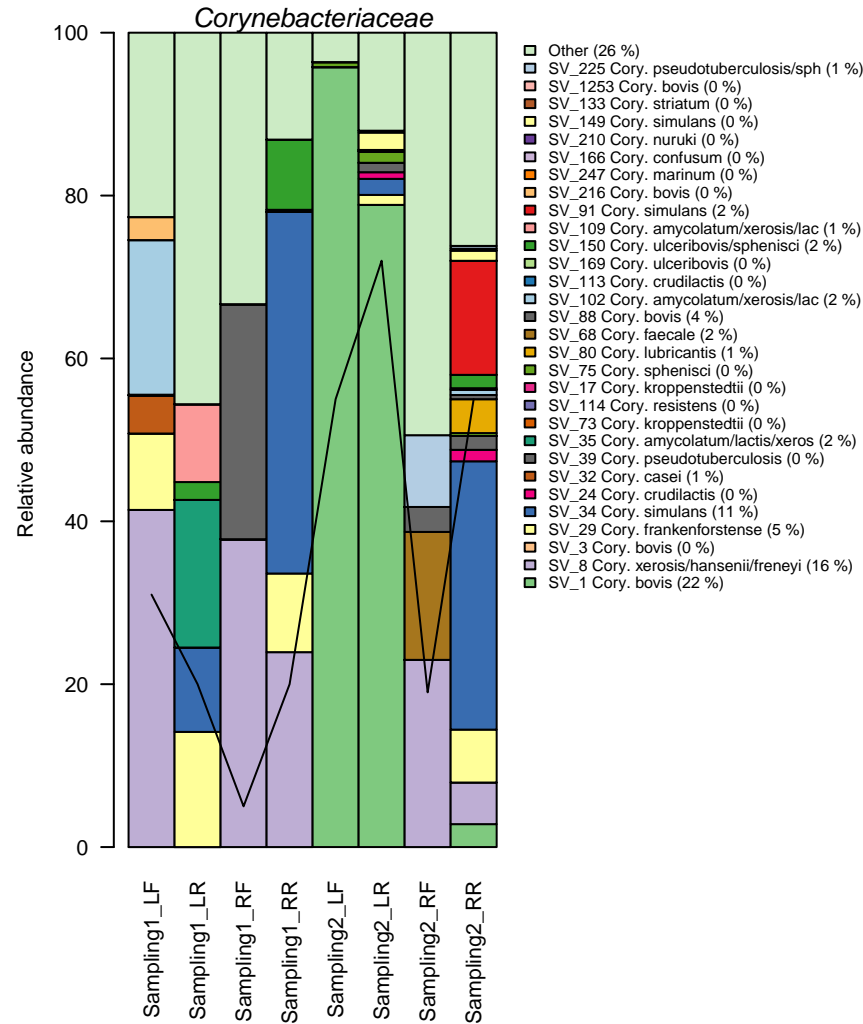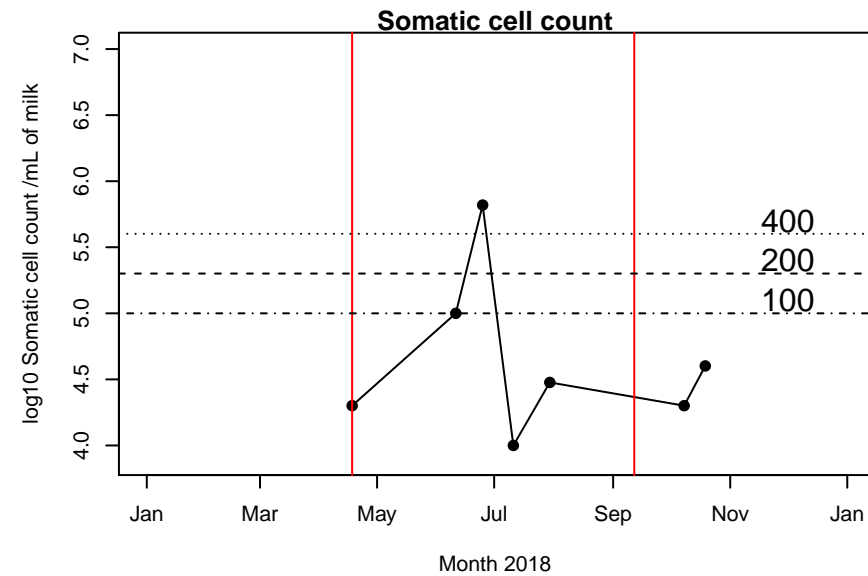

|                                     | # quarter | Sampling 1 | Sampling 2 |
|-------------------------------------|-----------|------------|------------|
| <b>Aerococcus viridans</b>          | 3         | 2          | 3          |
| <b>Bacillus pumilus</b>             | 1         | 1          | 0          |
| <b>Corynebacterium amycolatum</b>   | 1         | 1          | 0          |
| <b>Pediococcus pentosaceus</b>      | 2         | 1          | 1          |
| <b>Staphylococcus epidermidis</b>   | 3         | 4          | 1          |
| <b>Staphylococcus hominis</b>       | 1         | 1          | 0          |
| <b>Staphylococcus microti</b>       | 1         | 1          | 0          |
| <b>Staphylococcus saprophyticus</b> | 1         | 0          | 1          |
| <b>Staphylococcus sciuri</b>        | 1         | 0          | 1          |
| <b>Staphylococcus xylosum</b>       | 1         | 1          | 0          |
| <b>Streptococcus lutetiensis</b>    | 1         | 0          | 1          |

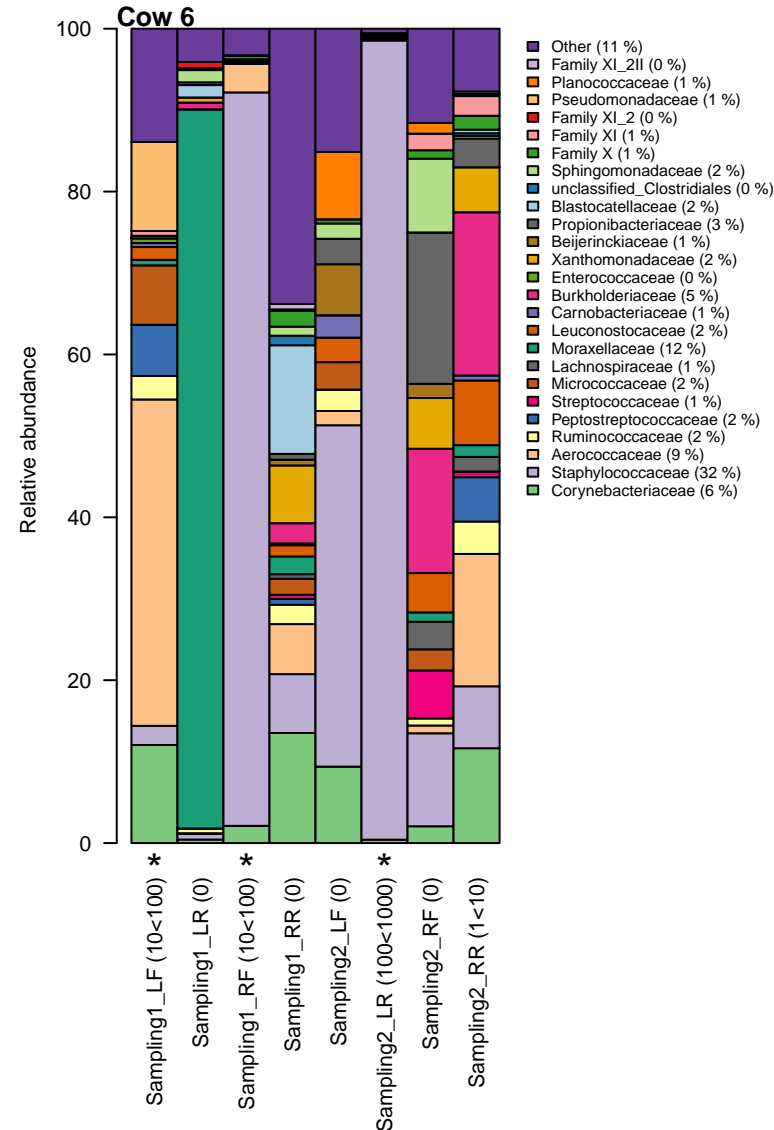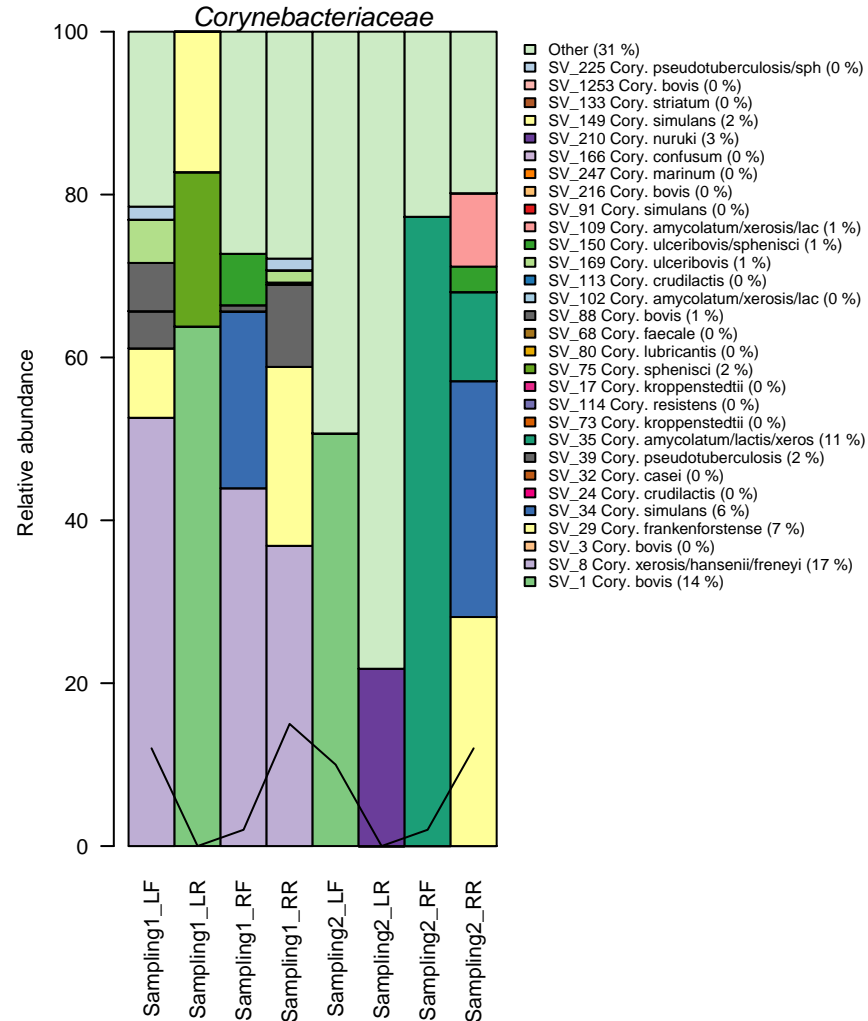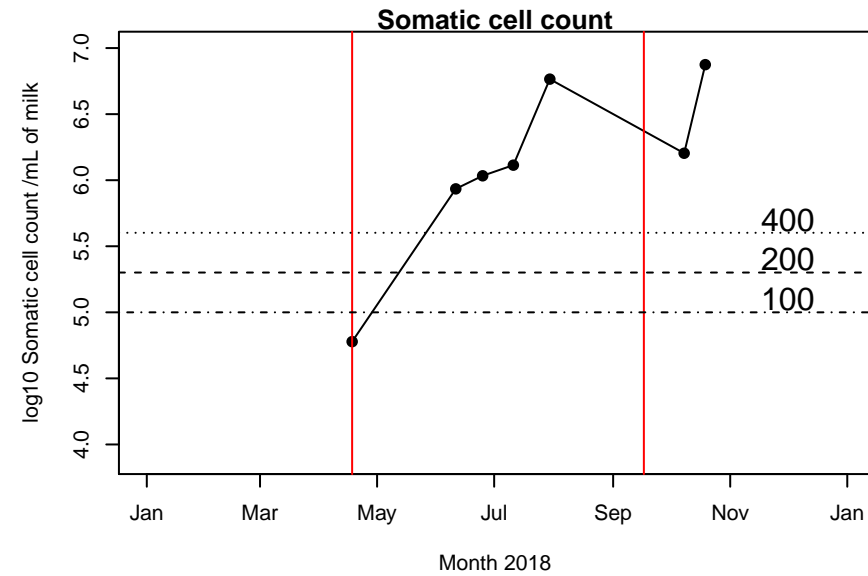

|                                    | # quarter | Sampling 1 | Sampling 2 |
|------------------------------------|-----------|------------|------------|
| <b>Aerococcus viridans</b>         | 4         | 3          | 1          |
| <b>Bacillus pumilus</b>            | 1         | 1          | 0          |
| <b>Pediococcus pentosaceus</b>     | 1         | 1          | 0          |
| <b>Staphylococcus epidermidis</b>  | 3         | 4          | 4          |
| <b>Staphylococcus haemolyticus</b> | 2         | 1          | 1          |

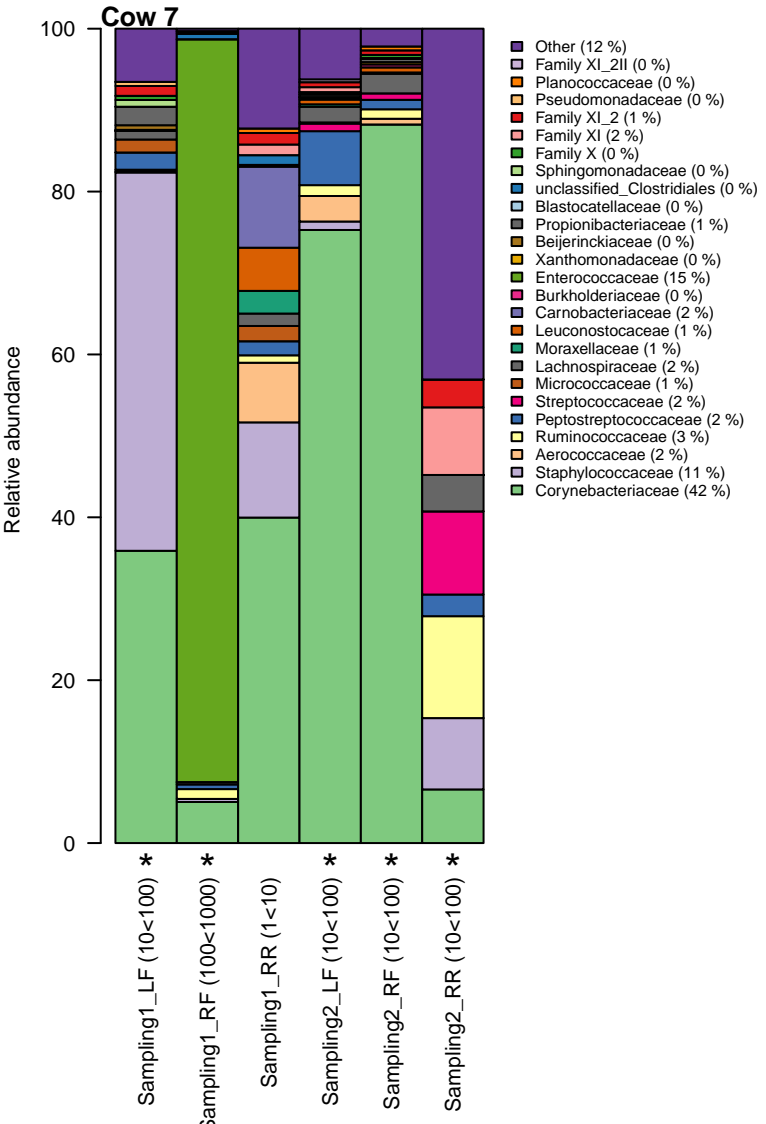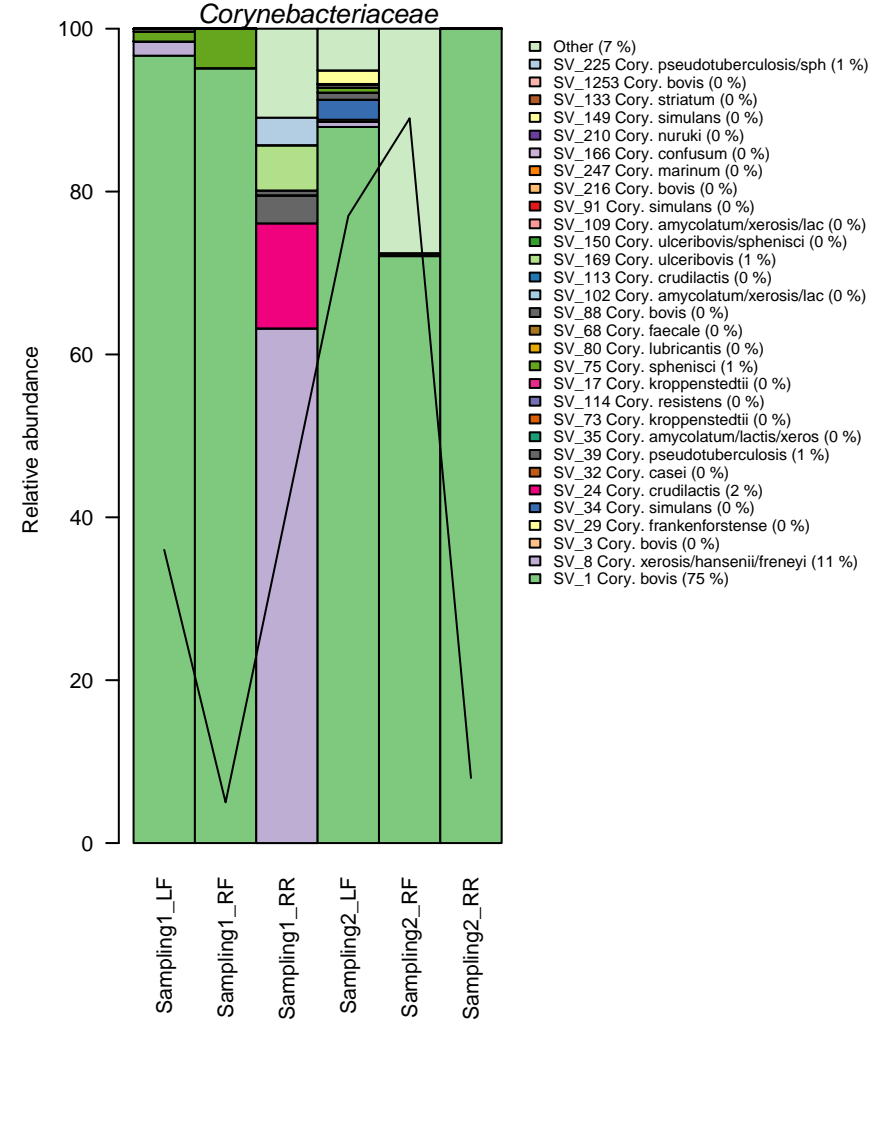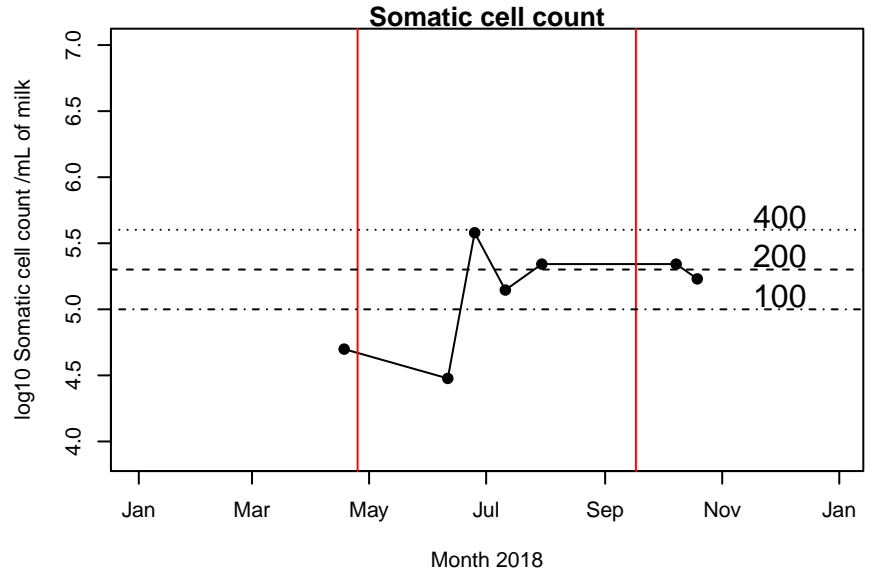

|                                   | # quarter | Sampling 1 | Sampling 2 |
|-----------------------------------|-----------|------------|------------|
| <b>Aerococcus viridans</b>        | 4         | 3          | 3          |
| <b>Bacillus licheniformis</b>     | 1         | 1          | 0          |
| <b>Bacillus pumilus</b>           | 1         | 1          | 0          |
| <b>Corynebacterium bovis</b>      | 1         | 0          | 1          |
| <b>Enterococcus gallinarum</b>    | 1         | 6          | 0          |
| <b>Staphylococcus chromogenes</b> | 2         | 1          | 2          |
| <b>Staphylococcus epidermidis</b> | 4         | 10         | 5          |
| <b>Staphylococcus hominis</b>     | 2         | 0          | 2          |
| <b>Streptococcus lutetiensis</b>  | 2         | 0          | 3          |

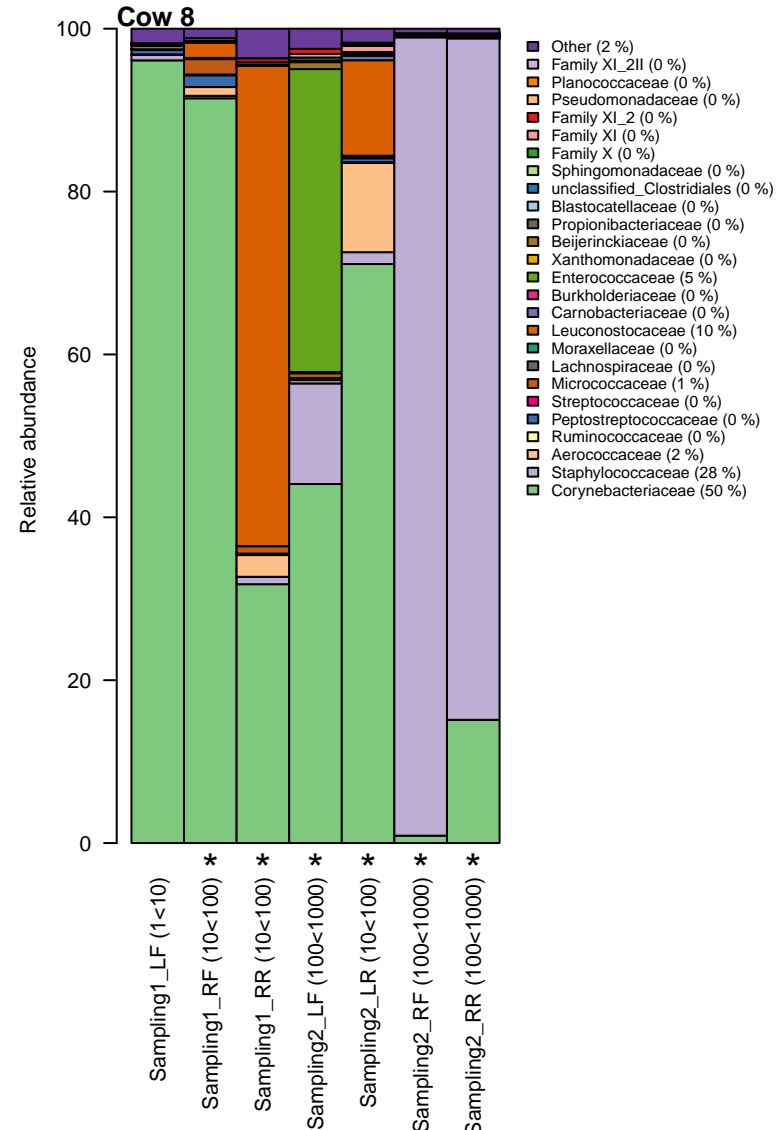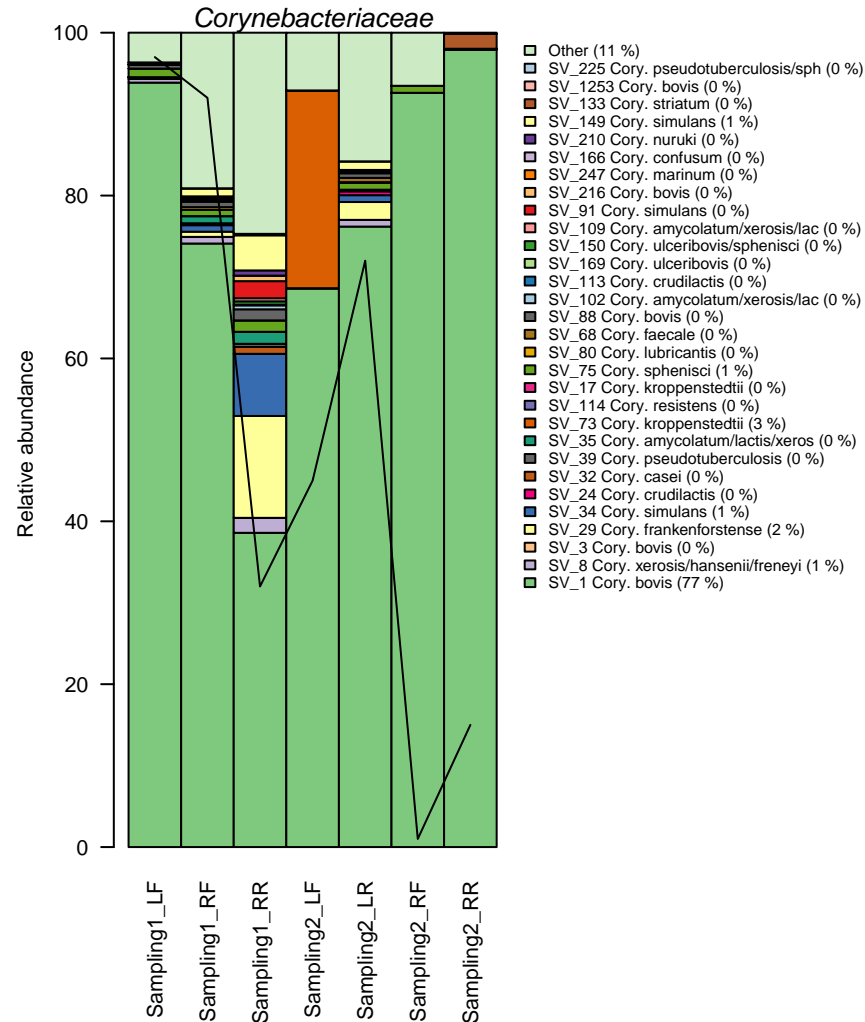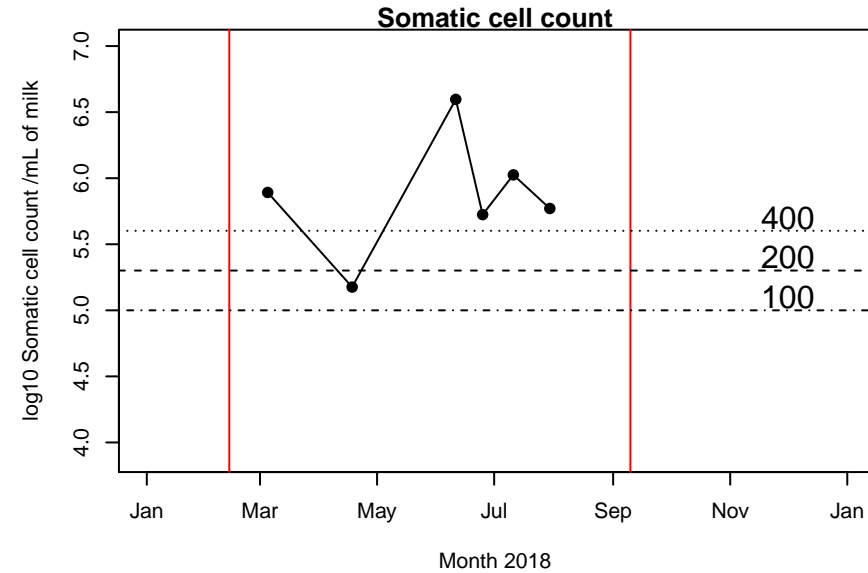

|                                    | # quarter | Sampling 1 | Sampling 2 |
|------------------------------------|-----------|------------|------------|
| <b>Aerococcus viridans</b>         | 3         | 4          | 2          |
| <b>Corynebacterium amycolatum</b>  | 1         | 1          | 0          |
| <b>Corynebacterium sp</b>          | 1         | 1          | 0          |
| <b>Enterococcus gallinarum</b>     | 1         | 0          | 2          |
| <b>Raoultella ornithinolytica</b>  | 1         | 1          | 0          |
| <b>Staphylococcus epidermidis</b>  | 5         | 4          | 10         |
| <b>Staphylococcus equorum</b>      | 1         | 1          | 0          |
| <b>Staphylococcus haemolyticus</b> | 1         | 1          | 0          |
| <b>Streptococcus parauberis</b>    | 1         | 1          | 0          |
| <b>Streptococcus uberis</b>        | 1         | 3          | 0          |

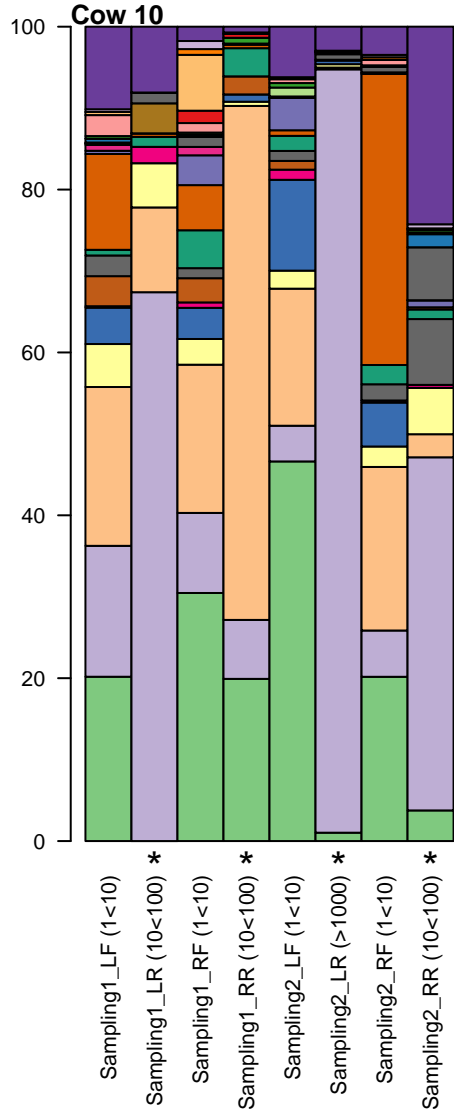

- Other (7 %)
- Family XI\_2II (0 %)
- Planococcaceae (0 %)
- Pseudomonadaceae (1 %)
- Family XI\_2 (0 %)
- Family XI (1 %)
- Family X (0 %)
- Sphingomonadaceae (0 %)
- unclassified\_Clostridiales (0 %)
- Blastocatellaceae (0 %)
- Propionibacteriaceae (1 %)
- Beijerinckiaceae (0 %)
- Xanthomonadaceae (0 %)
- Enterococcaceae (0 %)
- Burkholderiaceae (0 %)
- Carnobacteriaceae (1 %)
- Leuconostocaceae (7 %)
- Moraxellaceae (2 %)
- Lachnospiraceae (2 %)
- Micrococcaceae (1 %)
- Streptococcaceae (1 %)
- Peptostreptococcaceae (3 %)
- Ruminococcaceae (3 %)
- Aerococcaceae (19 %)
- Staphylococcaceae (31 %)
- Corynebacteriaceae (18 %)

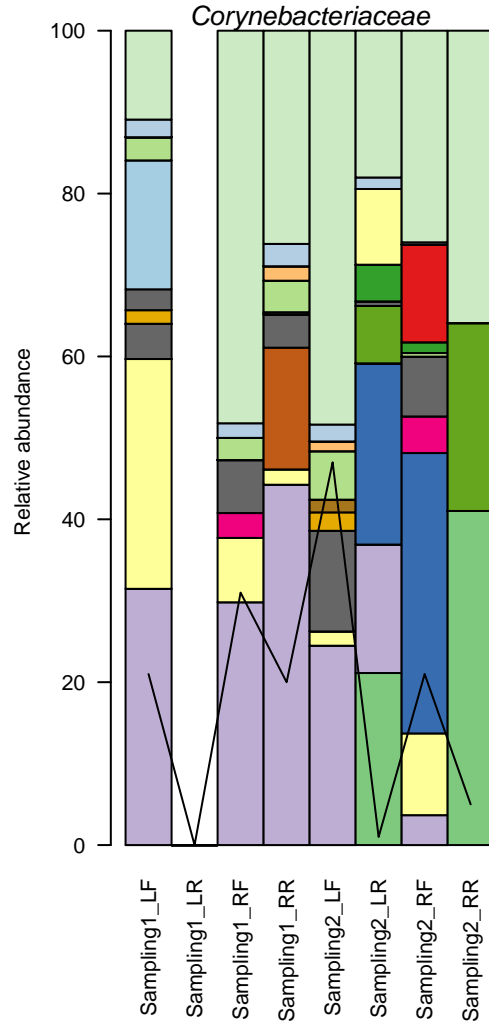

- Other (31 %)
- SV\_225 Cory. pseudotuberculosis/sph (1 %)
- SV\_1253 Cory. bovis (0 %)
- SV\_133 Cory. striatum (0 %)
- SV\_149 Cory. simulans (1 %)
- SV\_210 Cory. nuruki (0 %)
- SV\_166 Cory. confusum (0 %)
- SV\_247 Cory. marinum (0 %)
- SV\_216 Cory. bovis (0 %)
- SV\_91 Cory. simulans (2 %)
- SV\_109 Cory. amycolatum/xerosis/lac (0 %)
- SV\_150 Cory. ulceribovis/sphenisci (1 %)
- SV\_169 Cory. ulceribovis (2 %)
- SV\_113 Cory. crudilactis (0 %)
- SV\_102 Cory. amycolatum/xerosis/lac (2 %)
- SV\_88 Cory. bovis (0 %)
- SV\_68 Cory. faecale (0 %)
- SV\_80 Cory. lubricantis (1 %)
- SV\_75 Cory. sphenisci (4 %)
- SV\_17 Cory. kroppenstedtii (0 %)
- SV\_114 Cory. resistens (0 %)
- SV\_73 Cory. kroppenstedtii (0 %)
- SV\_35 Cory. amycolatum/lactis/xeros (0 %)
- SV\_39 Cory. pseudotuberculosis (5 %)
- SV\_32 Cory. casei (2 %)
- SV\_24 Cory. crudilactis (1 %)
- SV\_34 Cory. simulans (8 %)
- SV\_29 Cory. frankenforstense (7 %)
- SV\_3 Cory. bovis (0 %)
- SV\_8 Cory. xerosis/hansenii/freneyi (21 %)
- SV\_1 Cory. bovis (9 %)

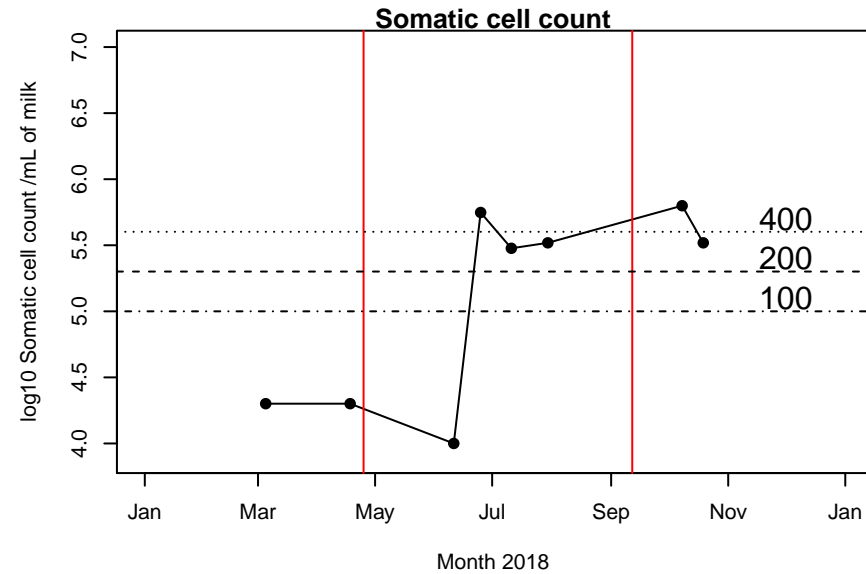

|                                    | # quarter | Sampling 1 | Sampling 2 |
|------------------------------------|-----------|------------|------------|
| <b>Aerococcus viridans</b>         | 6         | 8          | 2          |
| <b>Bacillus cereus</b>             | 1         | 0          | 1          |
| <b>Bacillus pumilus</b>            | 1         | 1          | 0          |
| <b>Pediococcus pentosaceus</b>     | 1         | 1          | 0          |
| <b>Staphylococcus chromogenes</b>  | 2         | 4          | 4          |
| <b>Staphylococcus epidermidis</b>  | 5         | 9          | 5          |
| <b>Staphylococcus haemolyticus</b> | 1         | 0          | 1          |
| <b>Staphylococcus hominis</b>      | 2         | 0          | 2          |

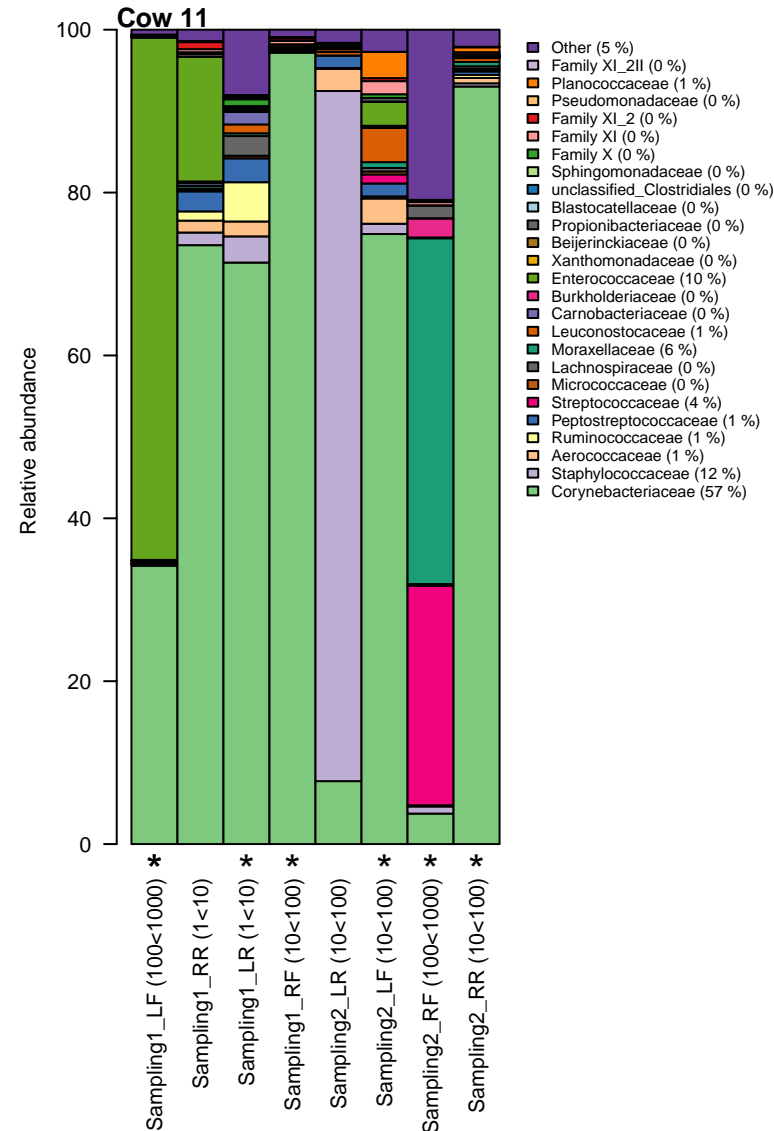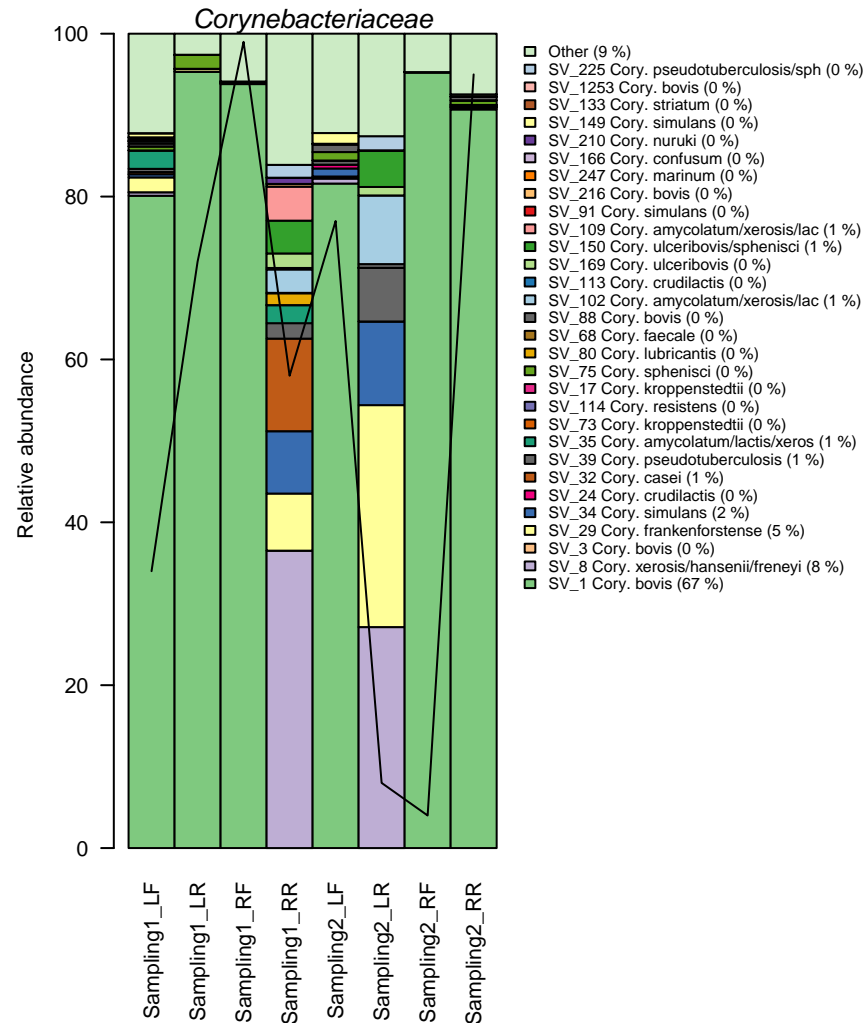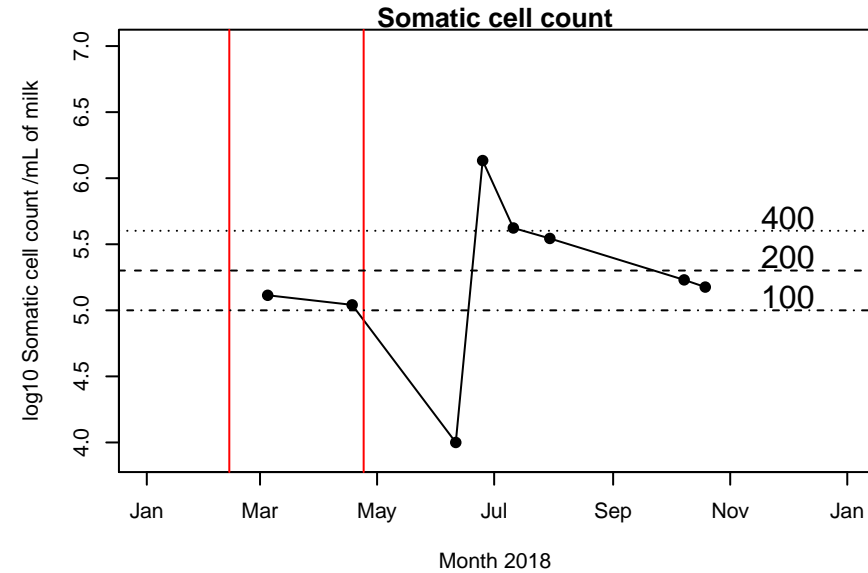

|                                   | # quarter | Sampling 1 | Sampling 2 |
|-----------------------------------|-----------|------------|------------|
| <b>Aerococcus viridans</b>        | 5         | 4          | 4          |
| <b>Aeromonas hydrophila</b>       | 1         | 0          | 1          |
| <b>Bacillus pumilus</b>           | 1         | 1          | 0          |
| <b>Citrobacter freundii</b>       | 1         | 0          | 1          |
| <b>Corynebacterium amycolatum</b> | 1         | 1          | 0          |
| <b>Corynebacterium bovis</b>      | 1         | 0          | 1          |
| <b>Enterococcus gallinarum</b>    | 4         | 9          | 3          |
| <b>Enterococcus malodoratus</b>   | 1         | 1          | 0          |
| <b>Lactobacillus plantarum</b>    | 1         | 1          | 0          |
| <b>Lactococcus raffinolactis</b>  | 1         | 0          | 1          |
| <b>Staphylococcus epidermidis</b> | 3         | 5          | 0          |
| <b>Staphylococcus equorum</b>     | 1         | 0          | 1          |
| <b>Staphylococcus warneri</b>     | 1         | 1          | 0          |
| <b>Staphylococcus xylosum</b>     | 2         | 11         | 0          |
| <b>Streptococcus parauberis</b>   | 1         | 0          | 2          |



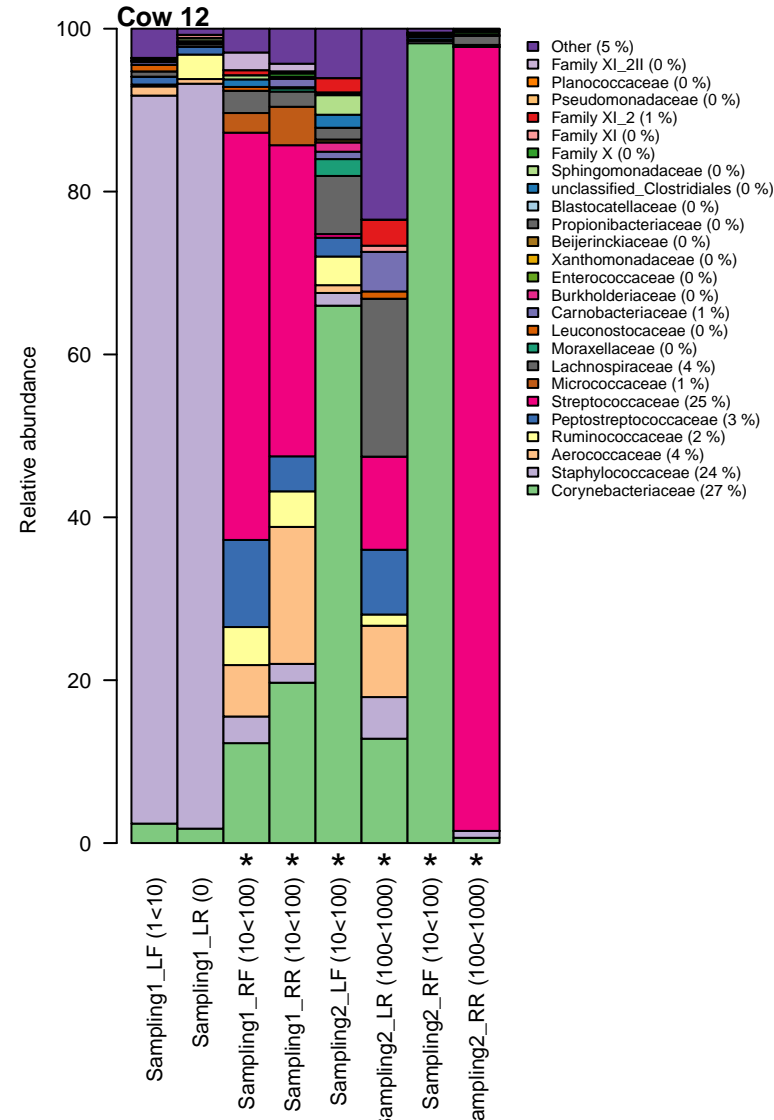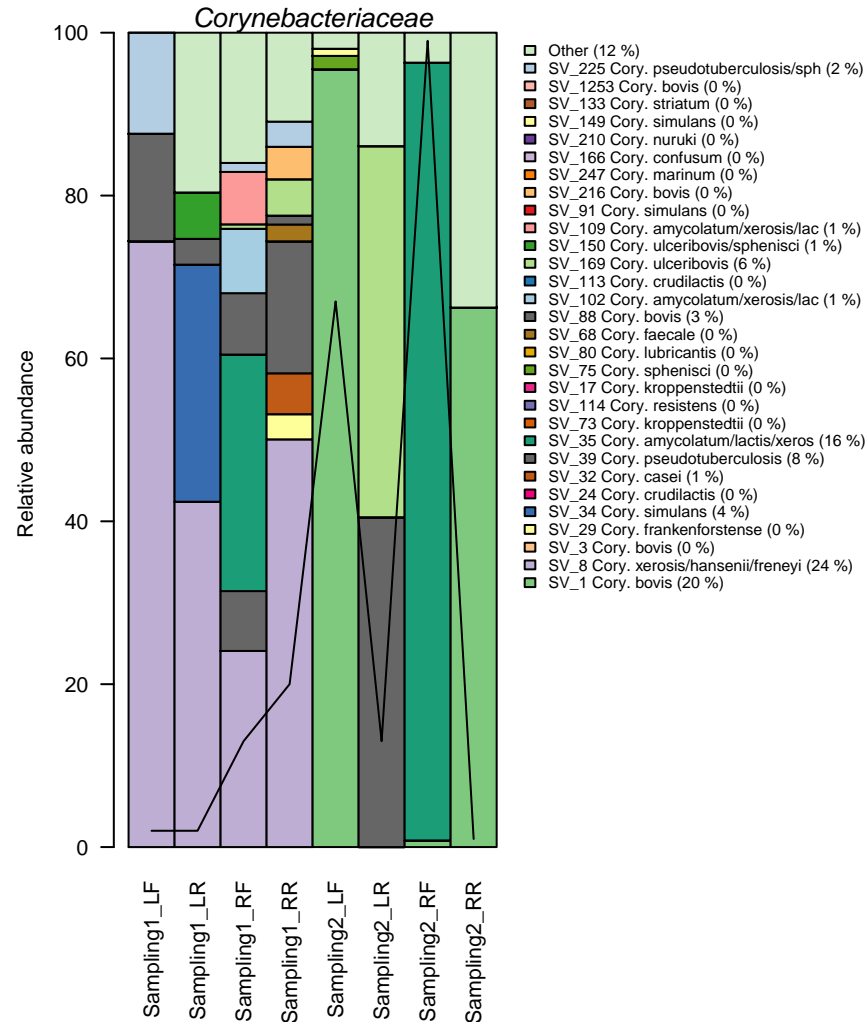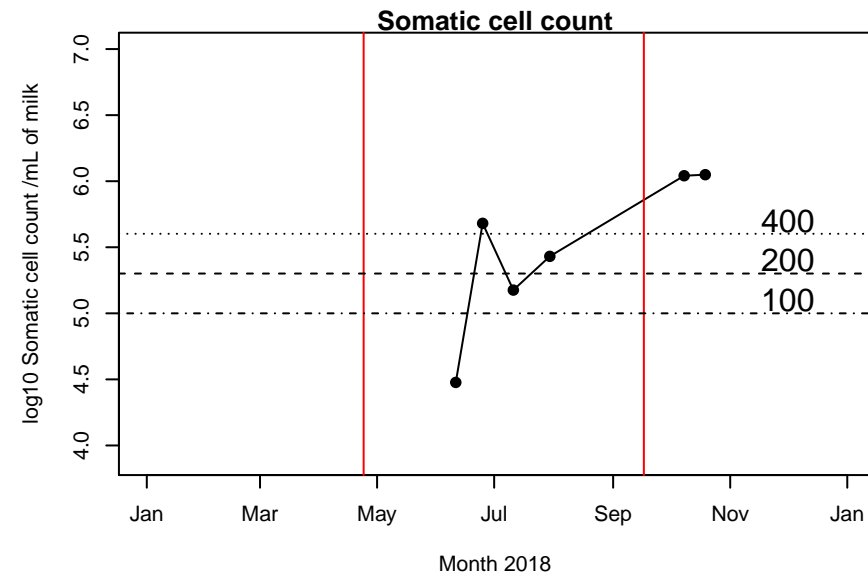

|                                    | # quarter | Sampling 1 | Sampling 2 |
|------------------------------------|-----------|------------|------------|
| <b>Aerococcus viridans</b>         | 4         | 3          | 2          |
| <b>Bacillus licheniformis</b>      | 1         | 1          | 0          |
| <b>Bacillus pumilus</b>            | 1         | 1          | 0          |
| <b>Corynebacterium amycolatum</b>  | 3         | 1          | 2          |
| <b>Corynebacterium bovis</b>       | 1         | 0          | 1          |
| <b>Enterococcus faecalis</b>       | 2         | 4          | 0          |
| <b>Pediococcus pentosaceus</b>     | 1         | 1          | 0          |
| <b>Staphylococcus aureus</b>       | 1         | 0          | 1          |
| <b>Staphylococcus epidermidis</b>  | 3         | 5          | 0          |
| <b>Staphylococcus haemolyticus</b> | 1         | 0          | 1          |
| <b>Staphylococcus warneri</b>      | 1         | 1          | 0          |
| <b>Streptococcus canis</b>         | 4         | 4          | 3          |
| <b>Streptococcus dysgalactiae</b>  | 1         | 0          | 1          |

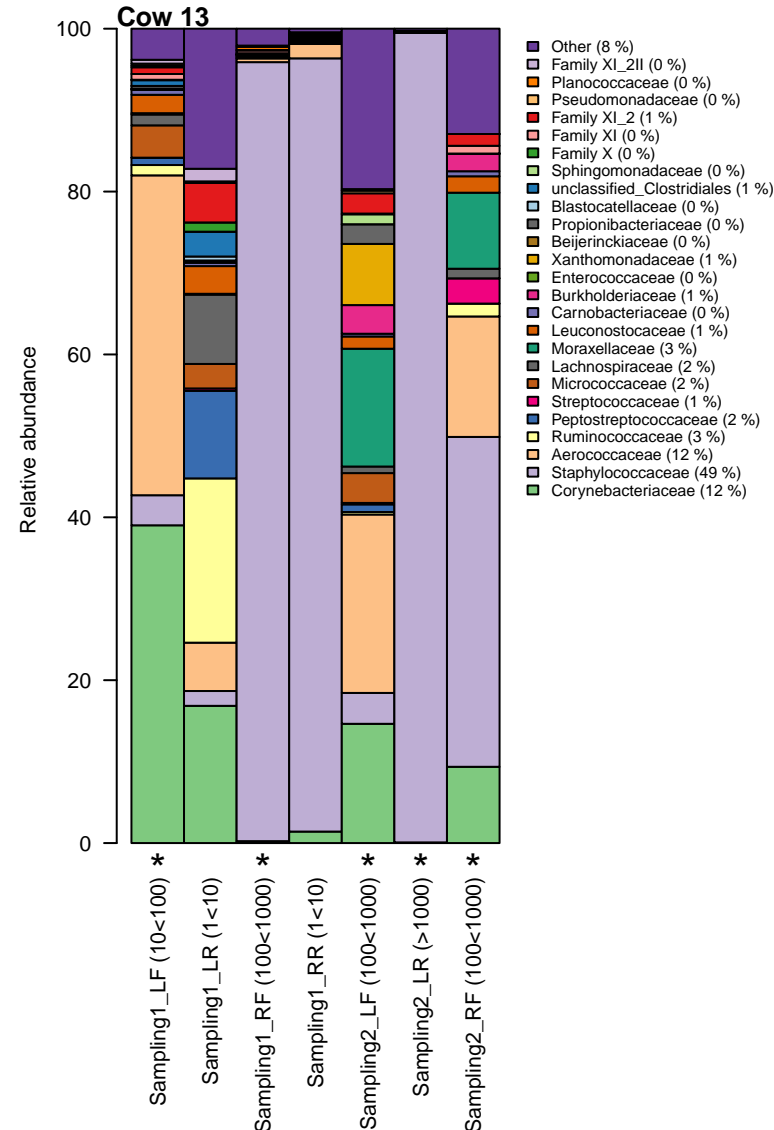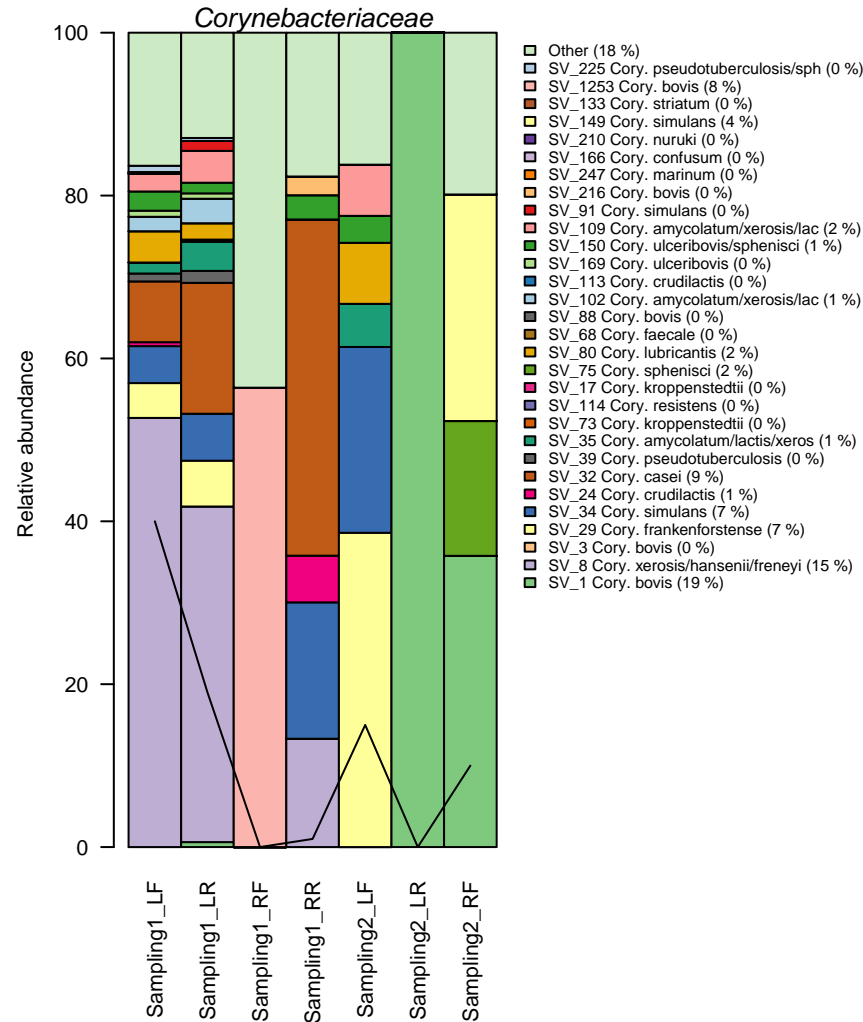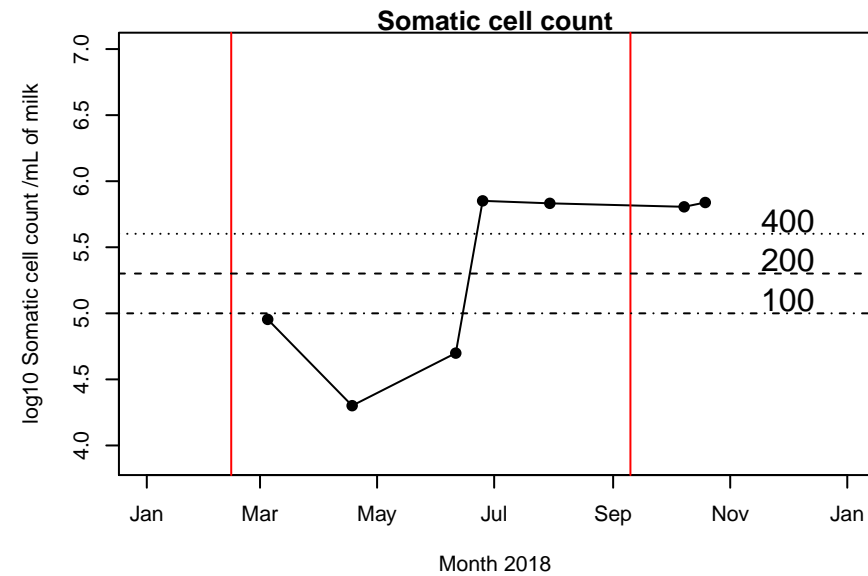

|                                    | # quarter | Sampling 1 | Sampling 2 |
|------------------------------------|-----------|------------|------------|
| <b>Aerococcus viridans</b>         | 5         | 3          | 9          |
| <b>Bacillus cereus</b>             | 1         | 0          | 1          |
| <b>Bacillus licheniformis</b>      | 2         | 2          | 0          |
| <b>Citrobacter gillenii</b>        | 1         | 0          | 2          |
| <b>Corynebacterium amycolatum</b>  | 2         | 1          | 1          |
| <b>Corynebacterium stationis</b>   | 1         | 1          | 0          |
| <b>Enterococcus gallinarum</b>     | 1         | 3          | 0          |
| <b>Escheria coli</b>               | 1         | 0          | 2          |
| <b>Lactobacillus plantarum</b>     | 1         | 0          | 1          |
| <b>Lactococcus lactis</b>          | 1         | 1          | 0          |
| <b>Staphylococcus epidermidis</b>  | 6         | 12         | 5          |
| <b>Staphylococcus haemolyticus</b> | 3         | 0          | 3          |
| <b>Staphylococcus simulans</b>     | 2         | 0          | 2          |
| <b>Streptococcus parauberis</b>    | 1         | 0          | 1          |
| <b>Tetragenococcus solitarius</b>  | 1         | 1          | 0          |

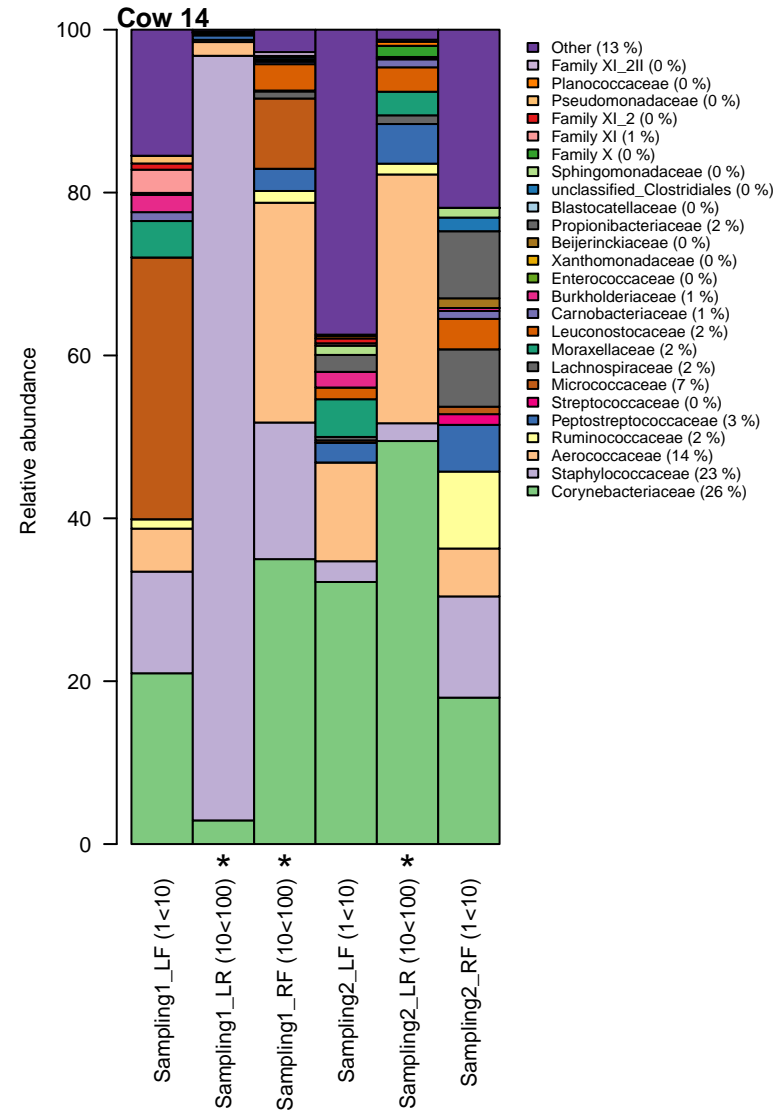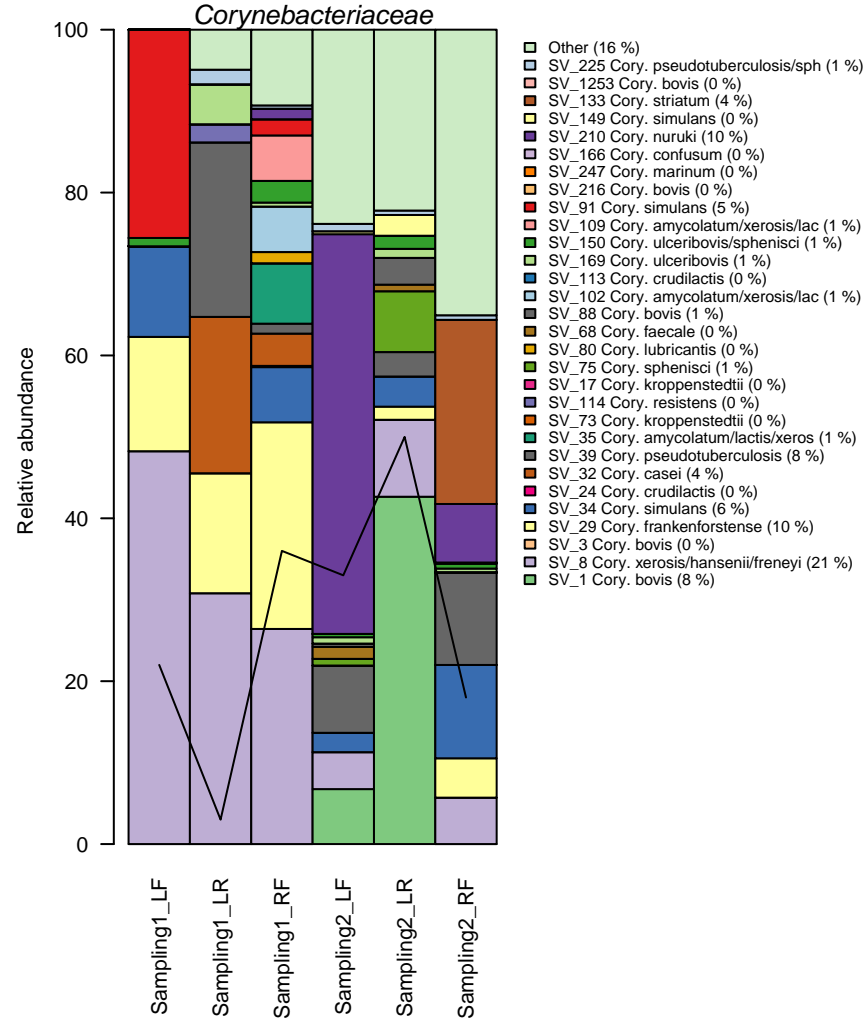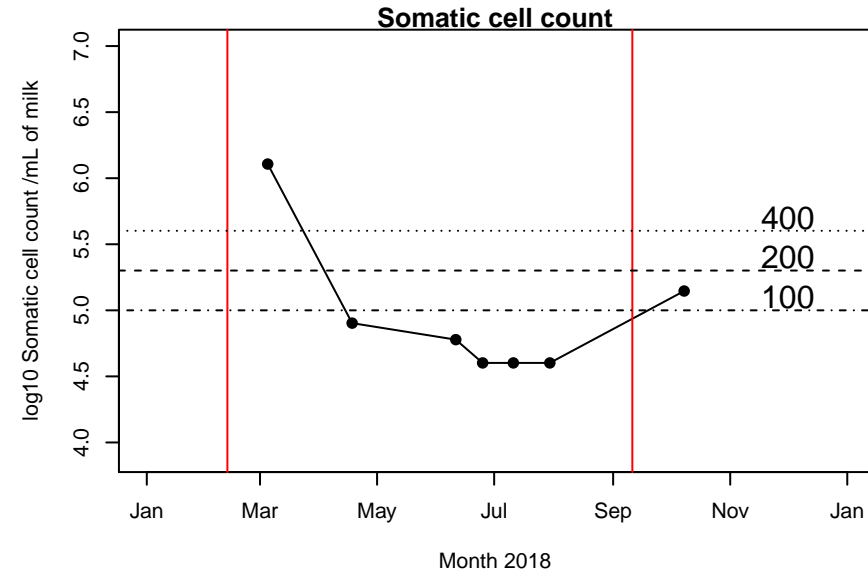

|                                     | # quarter | Sampling 1 | Sampling 2 |
|-------------------------------------|-----------|------------|------------|
| <b>Aerococcus viridans</b>          | 4         | 4          | 5          |
| <b>Bacillus licheniformis</b>       | 1         | 1          | 0          |
| <b>Bacillus pumilus</b>             | 1         | 1          | 0          |
| <b>Corynebacterium amycolatum</b>   | 1         | 1          | 0          |
| <b>Staphylococcus chromogenes</b>   | 1         | 2          | 0          |
| <b>Staphylococcus epidermidis</b>   | 2         | 2          | 0          |
| <b>Staphylococcus haemolyticus</b>  | 1         | 0          | 1          |
| <b>Staphylococcus hominis</b>       | 1         | 0          | 1          |
| <b>Staphylococcus saprophyticus</b> | 2         | 0          | 2          |
| <b>Staphylococcus sciuri</b>        | 1         | 1          | 0          |
| <b>Staphylococcus warneri</b>       | 1         | 1          | 0          |

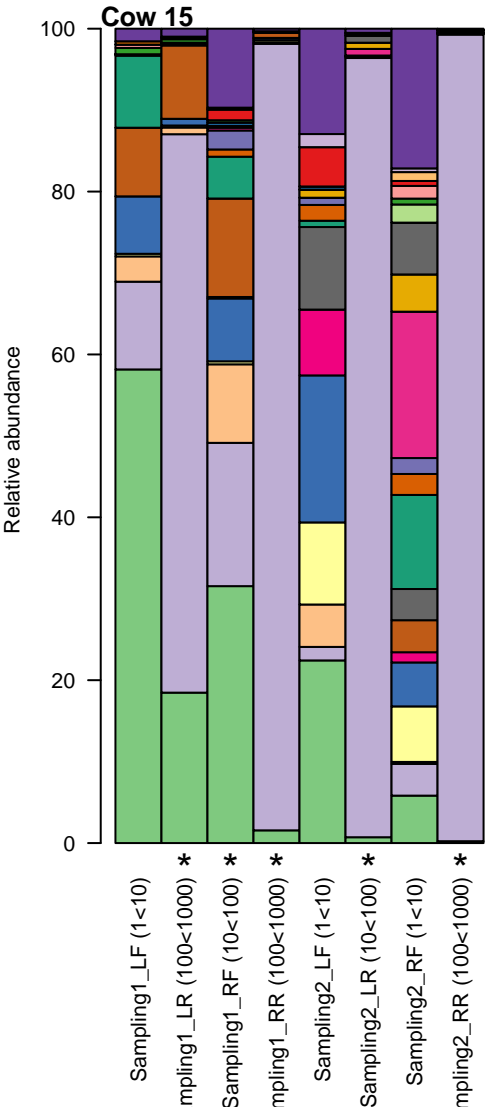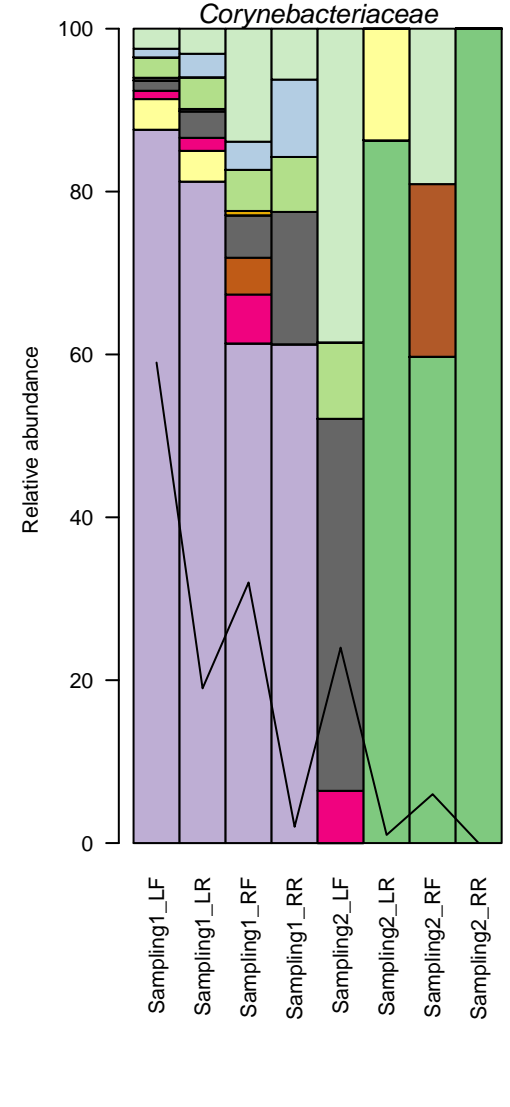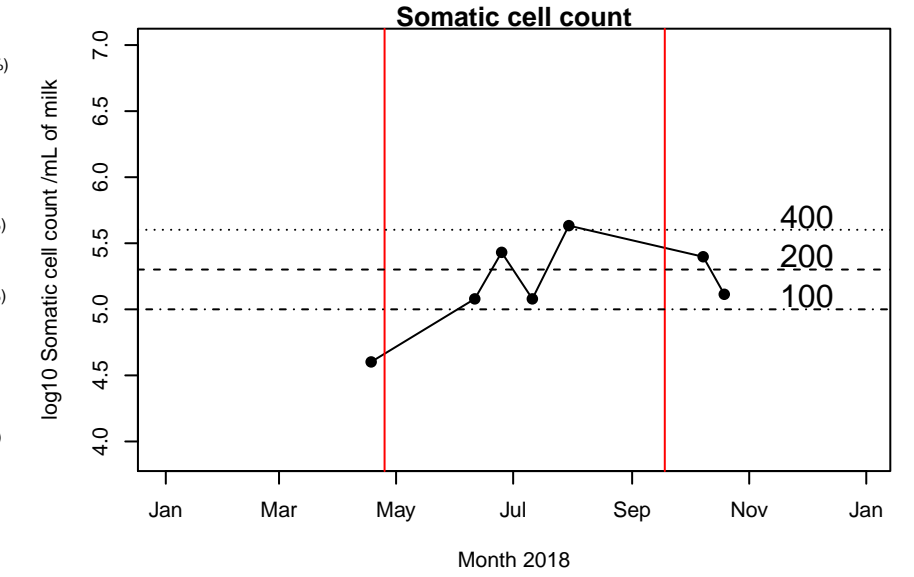

|                                   | # quarter | Sampling 1 |
|-----------------------------------|-----------|------------|
| <b>Aerococcus viridans</b>        | 2         | 3          |
| <b>Bacillus licheniformis</b>     | 1         | 2          |
| <b>Bacillus pumilus</b>           | 1         | 1          |
| <b>Kluyvera intermedia</b>        | 1         | 3          |
| <b>Lactococcus lactis</b>         | 1         | 2          |
| <b>Staphylococcus chromogenes</b> | 2         | 7          |
| <b>Staphylococcus equorum</b>     | 1         | 1          |
| <b>Staphylococcus hominis</b>     | 1         | 1          |
| <b>Streptococcus parauberis</b>   | 1         | 1          |

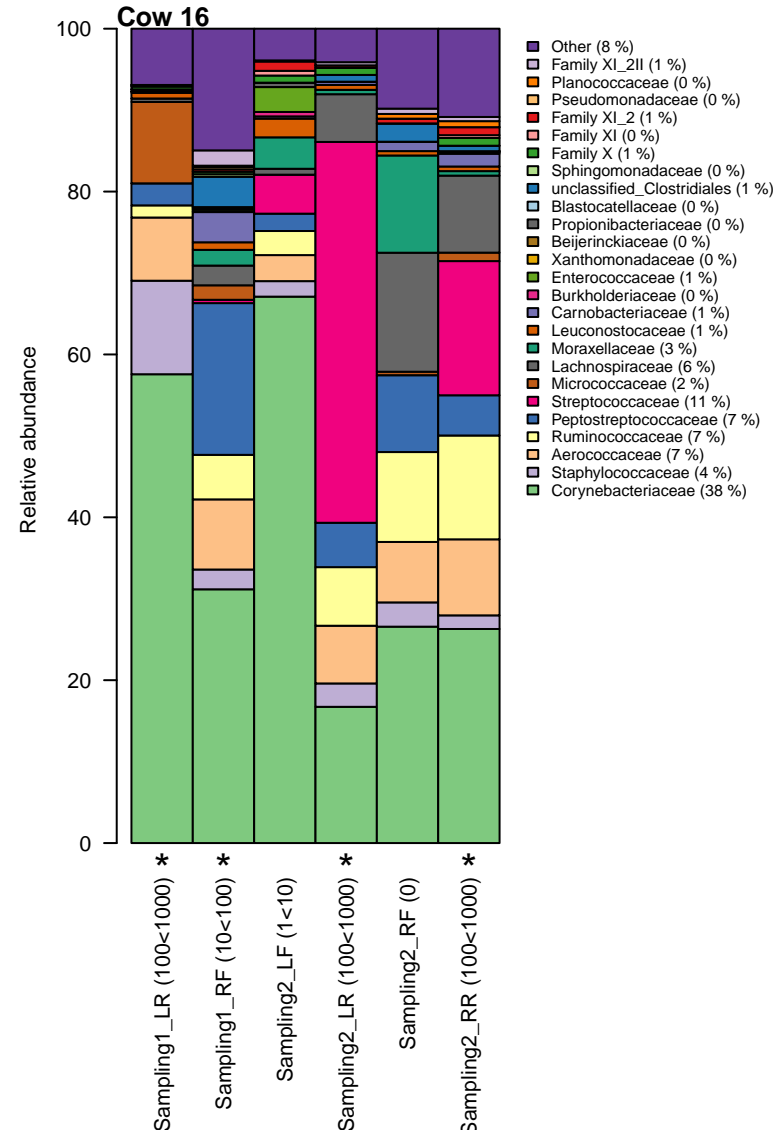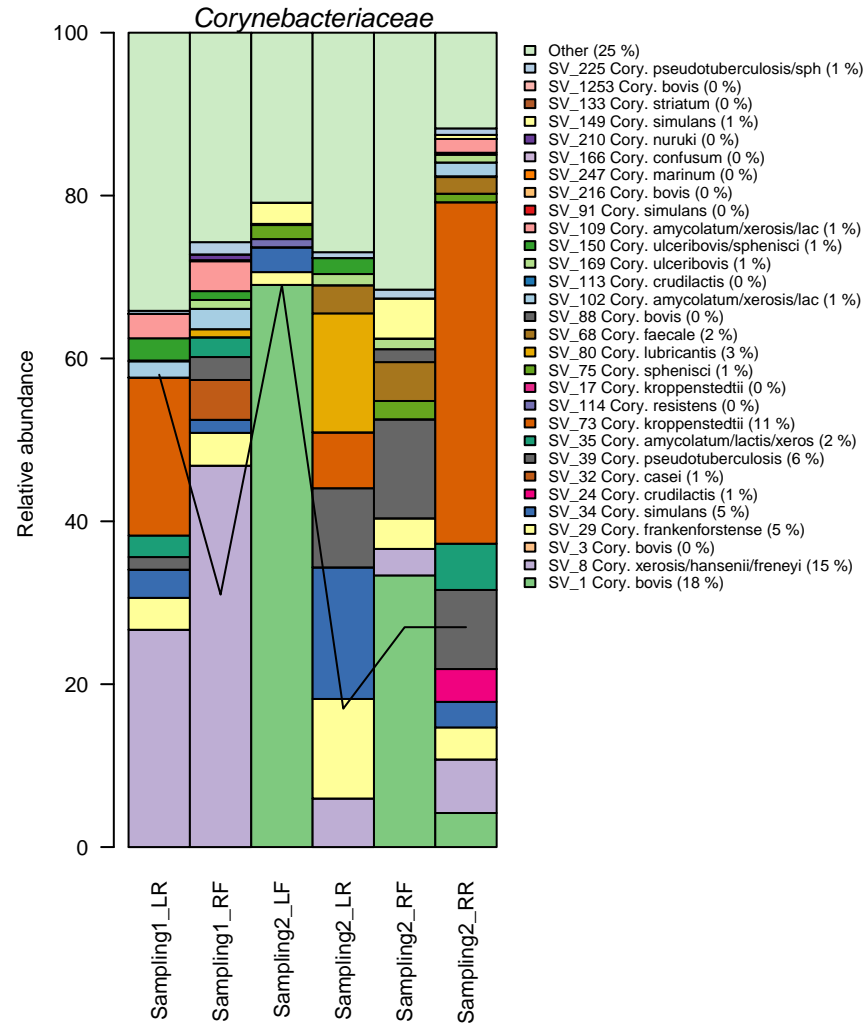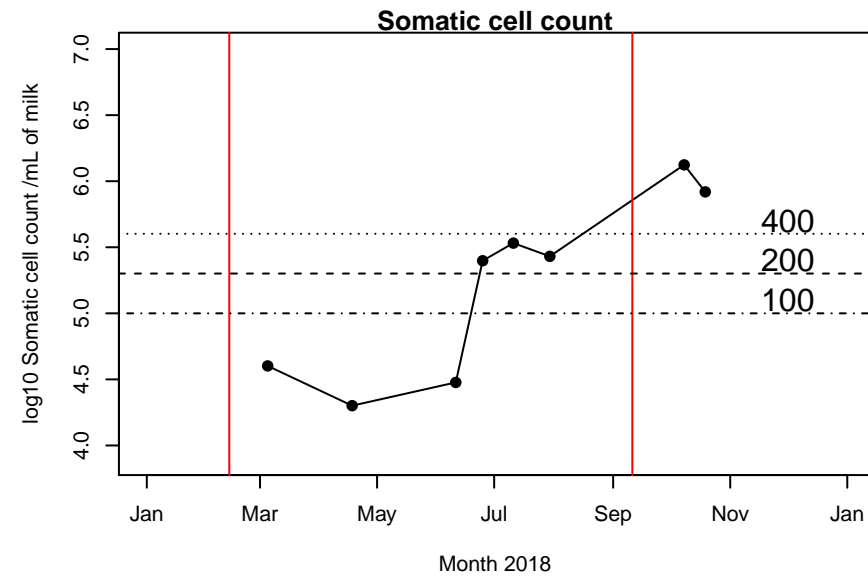

|                                   | # quarter | Sampling 1 | Sampling 2 |
|-----------------------------------|-----------|------------|------------|
| <b>Aerococcus viridans</b>        | 5         | 8          | 2          |
| <b>Bacillus licheniformis</b>     | 3         | 3          | 0          |
| <b>Bacillus pumilus</b>           | 1         | 1          | 0          |
| <b>Citrobacter koseri</b>         | 1         | 1          | 0          |
| <b>Corynebacterium freneyi</b>    | 1         | 1          | 0          |
| <b>Corynebacterium sp</b>         | 1         | 0          | 1          |
| <b>Enterococcus faecalis</b>      | 1         | 5          | 0          |
| <b>Lactococcus garvieae</b>       | 1         | 0          | 2          |
| <b>Pediococcus pentosaceus</b>    | 1         | 1          | 0          |
| <b>Staphylococcus epidermidis</b> | 5         | 8          | 4          |
| <b>Staphylococcus equorum</b>     | 2         | 2          | 0          |
| <b>Staphylococcus sciuri</b>      | 2         | 2          | 0          |
| <b>Streptococcus dysgalactiae</b> | 1         | 0          | 3          |
| <b>Streptococcus parauberis</b>   | 2         | 1          | 1          |
| <b>Streptococcus uberis</b>       | 1         | 0          | 2          |

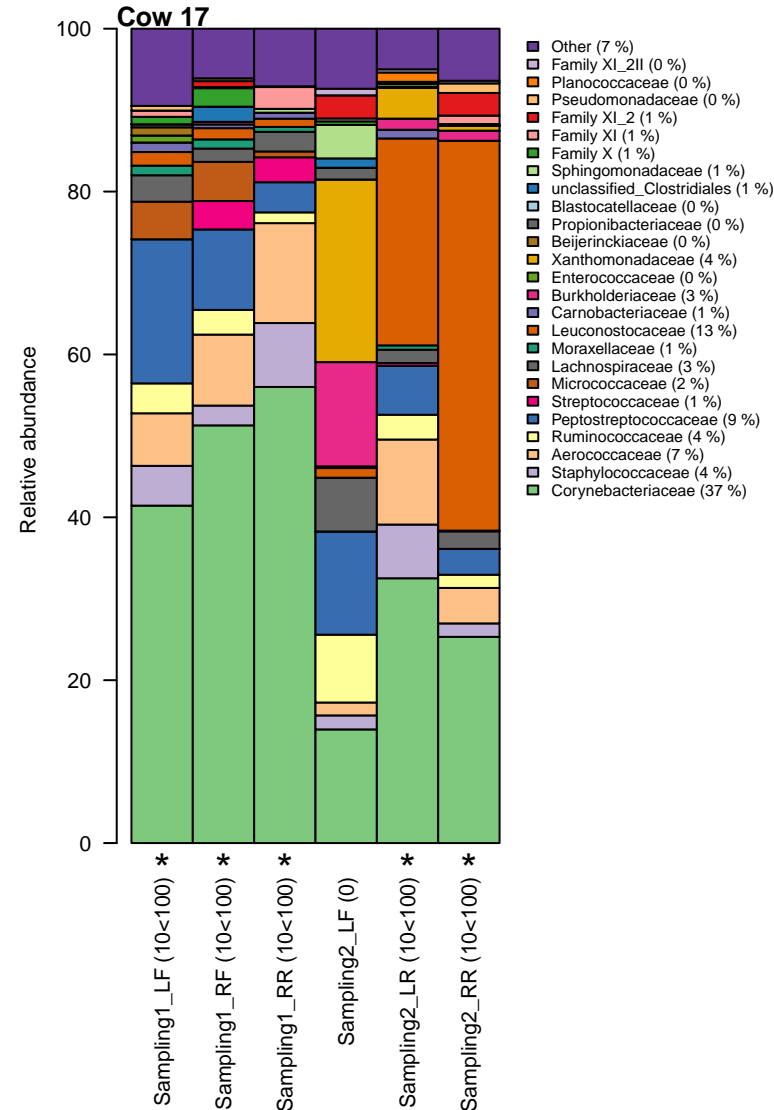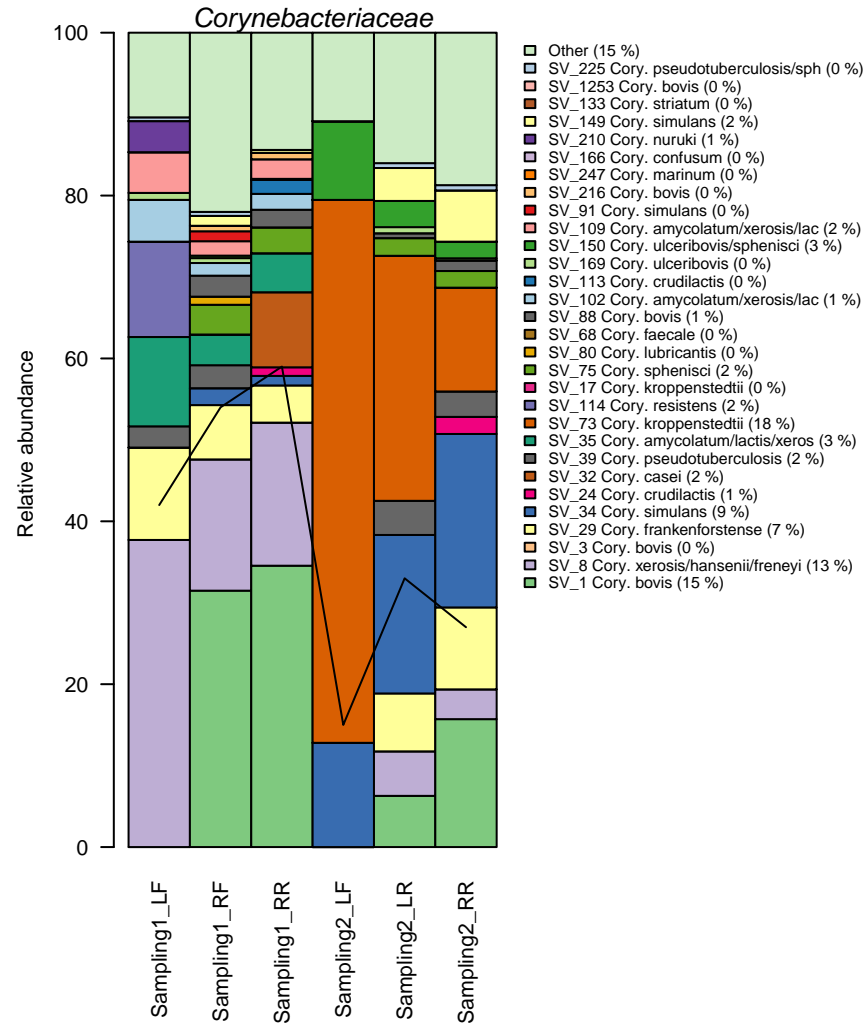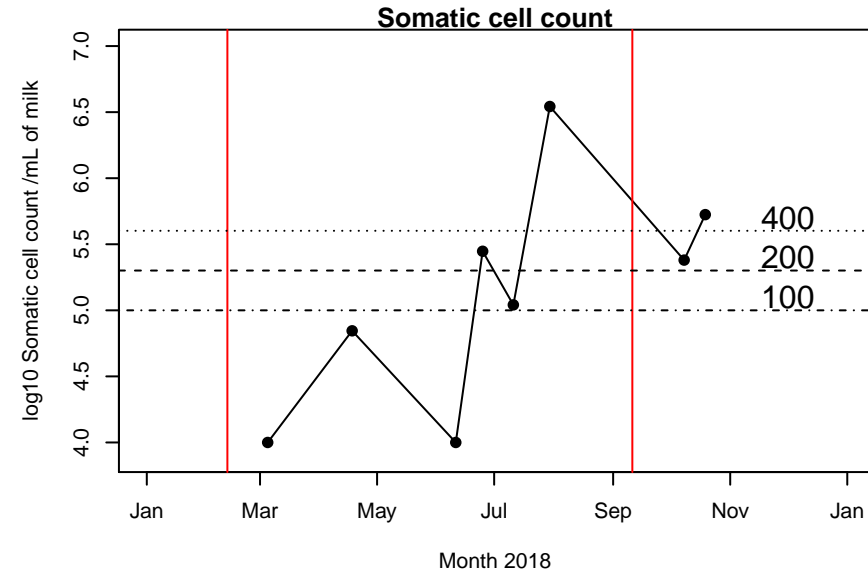

|                                       | # quarter | Sampling 1 | Sampling 2 |
|---------------------------------------|-----------|------------|------------|
| <b>Aerococcus viridans</b>            | 5         | 4          | 3          |
| <b>Aeromonas eucrenophila</b>         | 1         | 1          | 0          |
| <b>Bacillus pumilus</b>               | 2         | 2          | 0          |
| <b>Lactobacillus plantarum</b>        | 1         | 1          | 0          |
| <b>Pediococcus pentosaceus</b>        | 2         | 3          | 0          |
| <b>Staphylococcus epidermidis</b>     | 3         | 3          | 0          |
| <b>Staphylococcus haemolyticus</b>    | 2         | 1          | 1          |
| <b>Staphylococcus hominis</b>         | 3         | 1          | 2          |
| <b>Staphylococcus piscifermentans</b> | 1         | 0          | 1          |
| <b>Streptococcus parauberis</b>       | 1         | 1          | 0          |
| <b>Tetragenococcus solitarius</b>     | 1         | 1          | 0          |

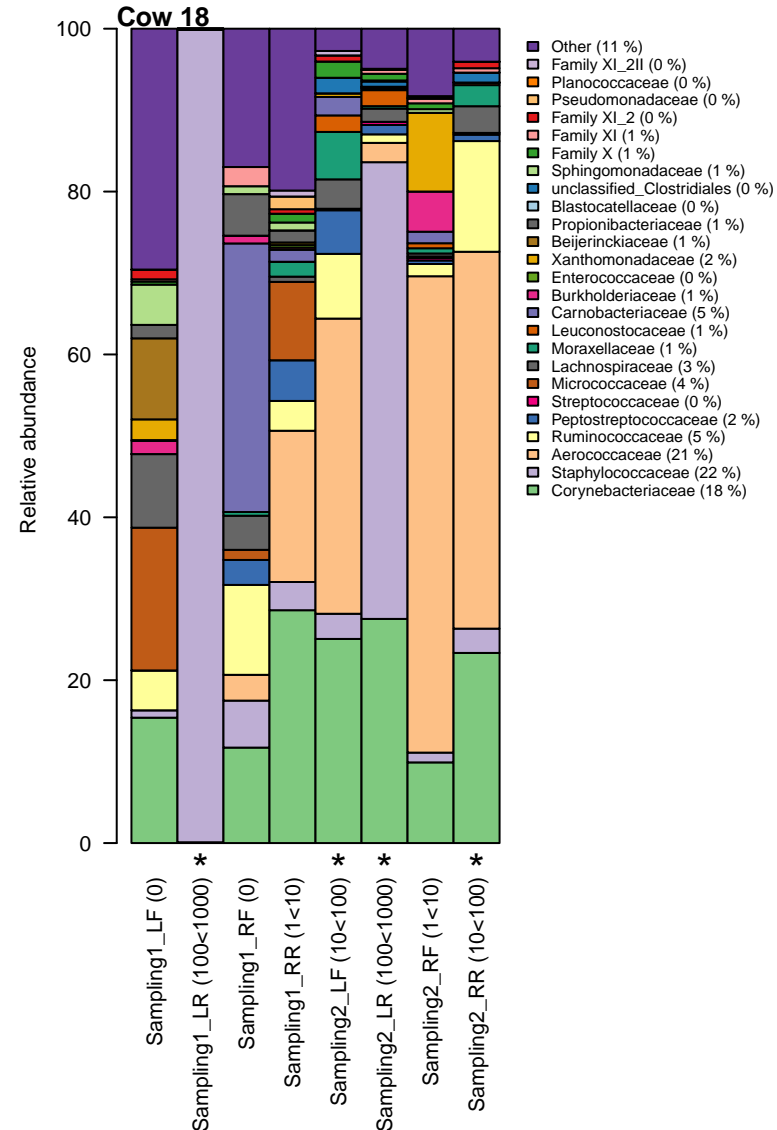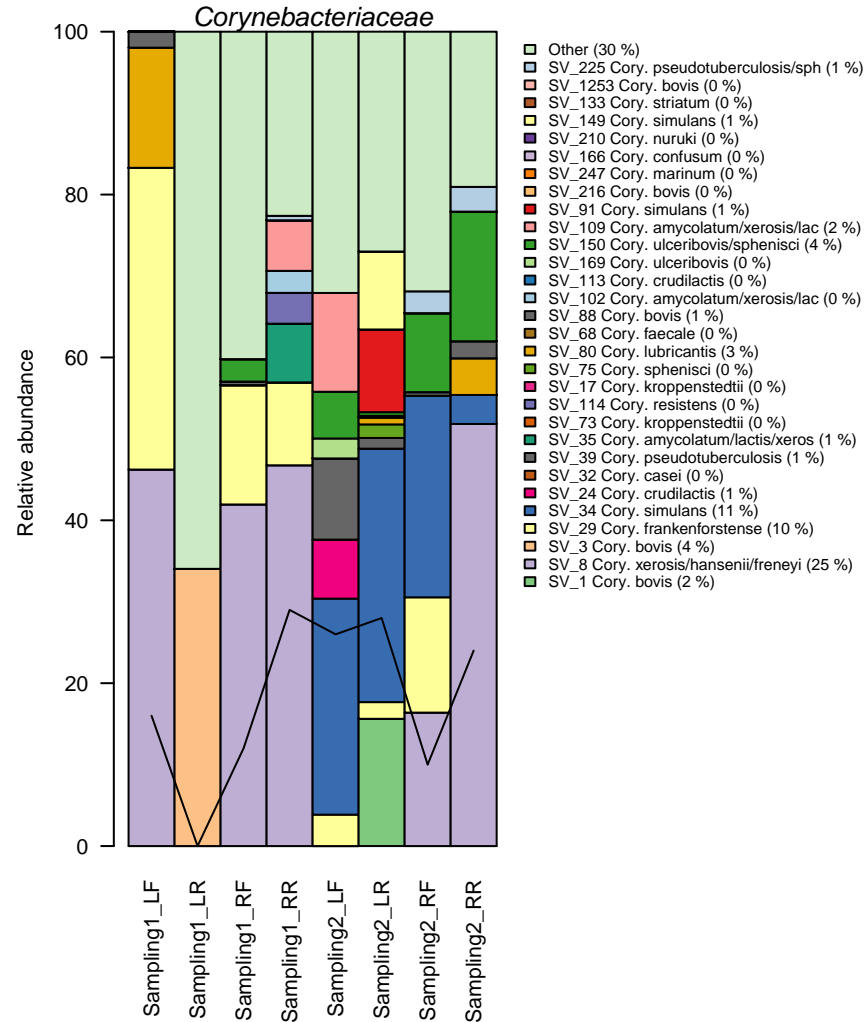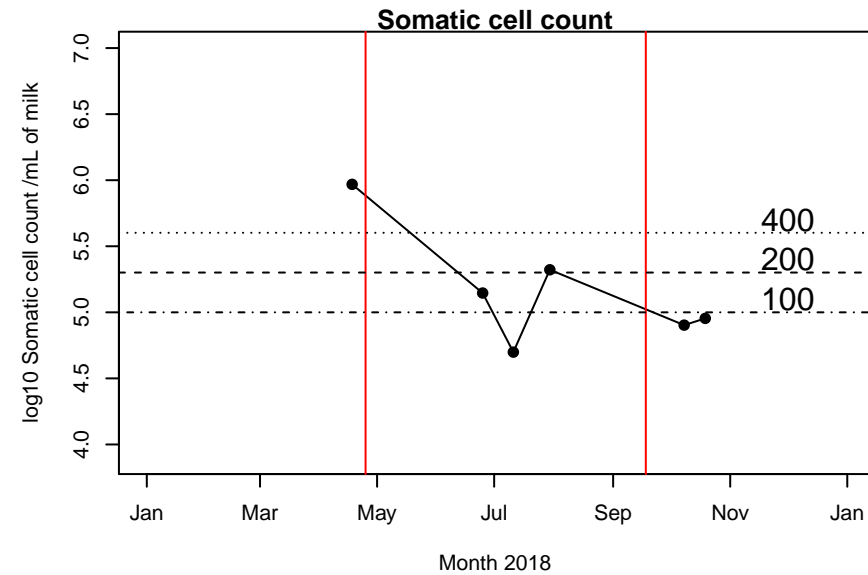

|                                    | # quarter | Sampling 1 |
|------------------------------------|-----------|------------|
| <b>Aerococcus viridans</b>         | 1         | 1          |
| <b>Corynebacterium amycolatum</b>  | 1         | 2          |
| <b>Corynebacterium aurimucosum</b> | 1         | 1          |
| <b>Staphylococcus epidermidis</b>  | 3         | 7          |
| <b>Streptococcus parauberis</b>    | 1         | 1          |

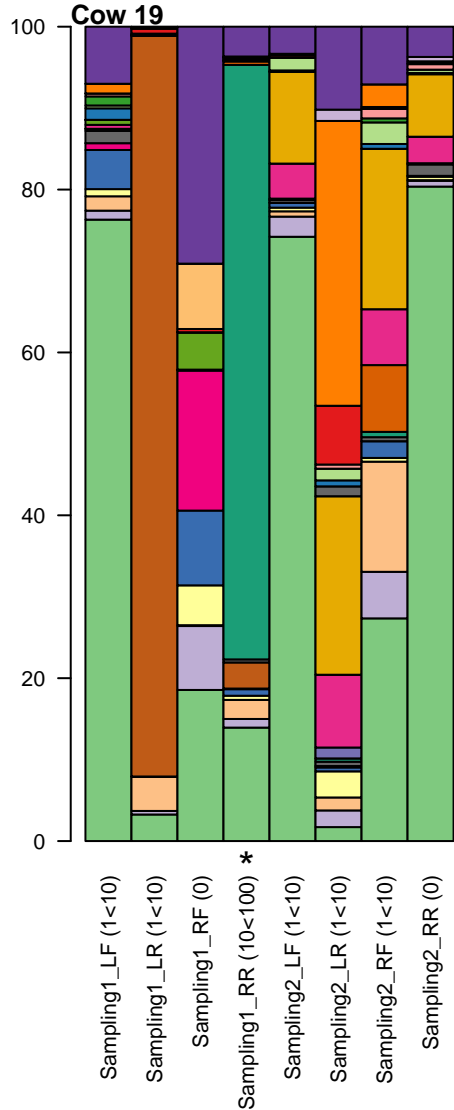

- Other (8 %)
- Family XI\_2II (0 %)
- Planococcaceae (5 %)
- Pseudomonadaceae (1 %)
- Family XI\_2 (1 %)
- Family XI (0 %)
- Family X (0 %)
- Sphingomonadaceae (1 %)
- unclassified\_Clostridiales (0 %)
- Blastocatellaceae (0 %)
- Propionibacteriaceae (0 %)
- Beijerinckiaceae (0 %)
- Xanthomonadaceae (8 %)
- Enterococcaceae (1 %)
- Burkholderiaceae (3 %)
- Carnobacteriaceae (0 %)
- Leuconostocaceae (1 %)
- Moraxellaceae (9 %)
- Lachnospiraceae (1 %)
- Micrococcaceae (12 %)
- Streptococcaceae (2 %)
- Peptostreptococcaceae (2 %)
- Ruminococcaceae (1 %)
- Aerococcaceae (3 %)
- Staphylococcaceae (3 %)
- Corynebacteriaceae (37 %)

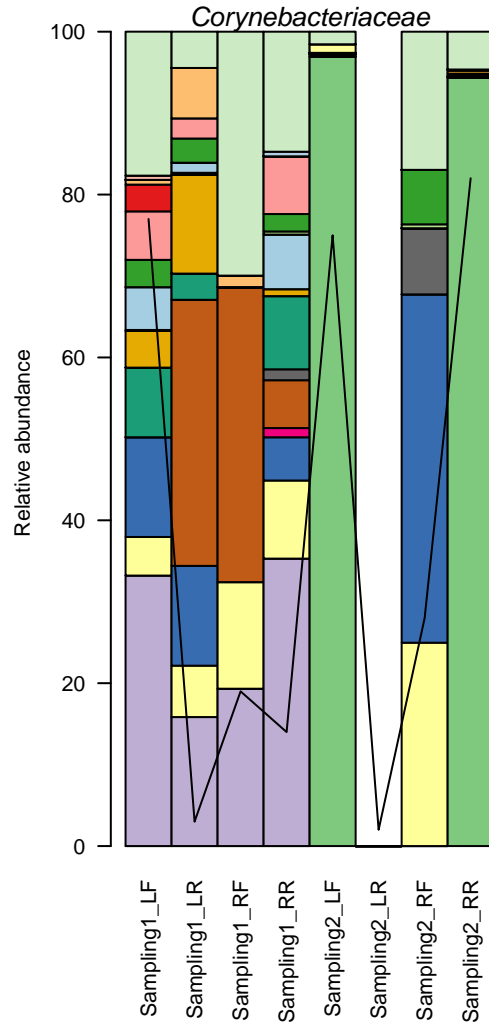

- Other (13 %)
- SV\_225 Cory. pseudotuberculosis/sph (0 %)
- SV\_1253 Cory. bovis (0 %)
- SV\_133 Cory. striatum (0 %)
- SV\_149 Cory. simulans (0 %)
- SV\_210 Cory. nuruki (0 %)
- SV\_166 Cory. confusum (0 %)
- SV\_247 Cory. marinum (0 %)
- SV\_216 Cory. bovis (1 %)
- SV\_91 Cory. simulans (0 %)
- SV\_109 Cory. amycolatum/xerosis/lac (2 %)
- SV\_150 Cory. ulceribovis/sphenisci (2 %)
- SV\_169 Cory. ulceribovis (0 %)
- SV\_113 Cory. crudilactis (0 %)
- SV\_102 Cory. amycolatum/xerosis/lac (2 %)
- SV\_88 Cory. bovis (0 %)
- SV\_68 Cory. faecale (0 %)
- SV\_80 Cory. lubricantis (3 %)
- SV\_75 Cory. sphenisci (0 %)
- SV\_17 Cory. kroppenstedtii (0 %)
- SV\_114 Cory. resistens (0 %)
- SV\_73 Cory. kroppenstedtii (0 %)
- SV\_35 Cory. amycolatum/lactis/xeros (3 %)
- SV\_39 Cory. pseudotuberculosis (1 %)
- SV\_32 Cory. casei (11 %)
- SV\_24 Cory. crudilactis (0 %)
- SV\_34 Cory. simulans (10 %)
- SV\_29 Cory. frankenforstense (8 %)
- SV\_3 Cory. bovis (0 %)
- SV\_8 Cory. xerosis/hansenii/freneyi (15 %)
- SV\_1 Cory. bovis (27 %)

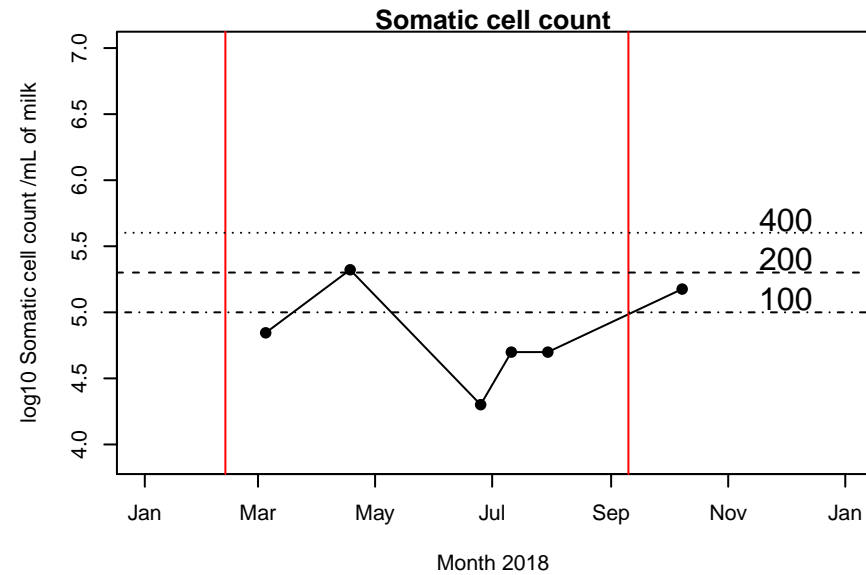

|                                    | # quarter | Sampling 1 | Sampling 2 |
|------------------------------------|-----------|------------|------------|
| <b>Aerococcus viridans</b>         | 5         | 3          | 3          |
| <b>Bacillus pumilus</b>            | 1         | 1          | 0          |
| <b>Staphylococcus epidermidis</b>  | 2         | 2          | 0          |
| <b>Staphylococcus haemolyticus</b> | 1         | 1          | 0          |
| <b>Staphylococcus hominis</b>      | 1         | 0          | 1          |



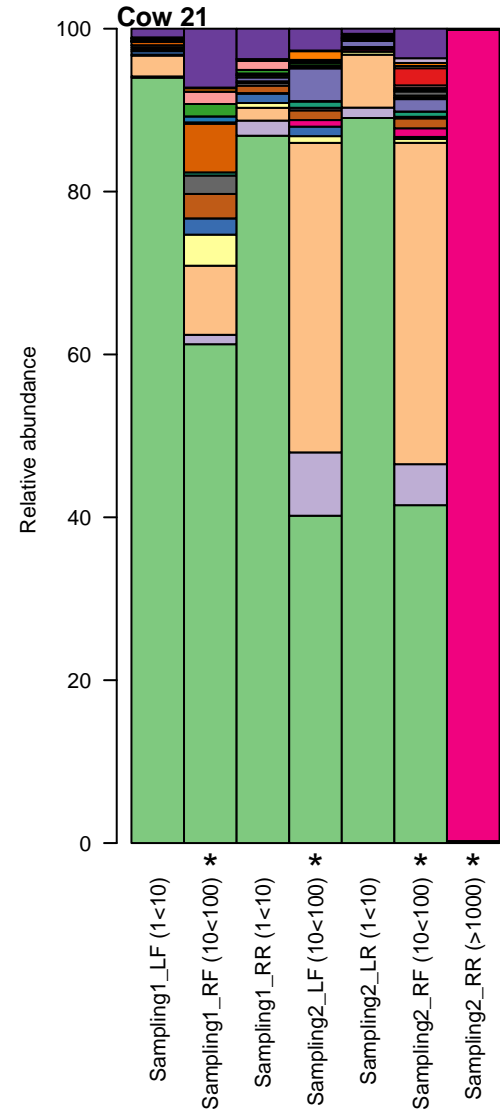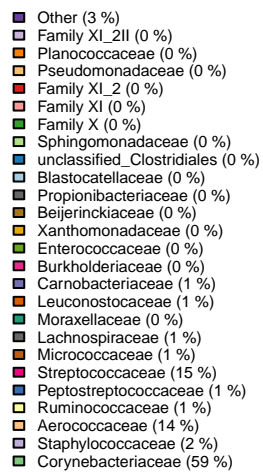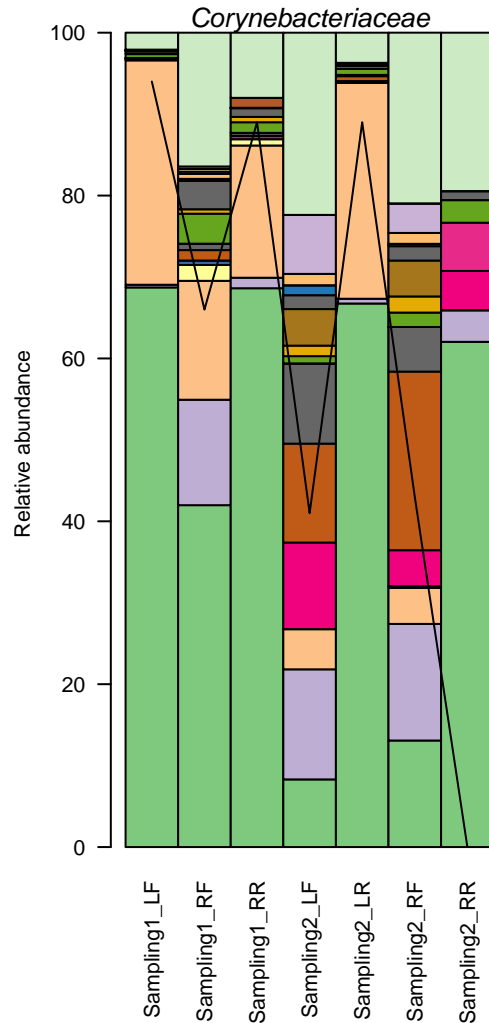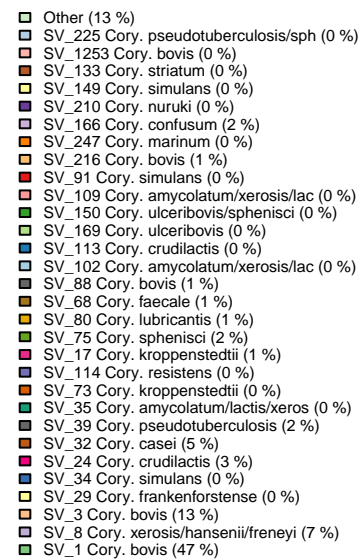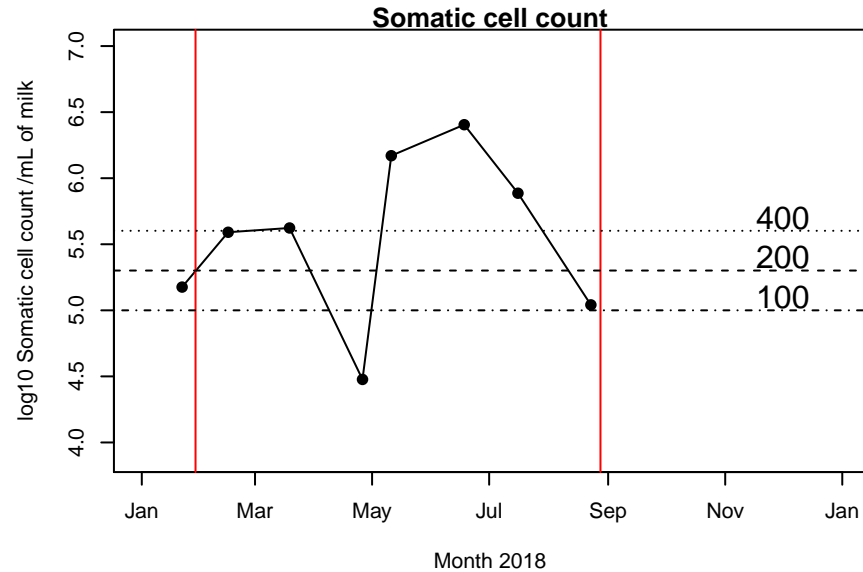

|                                     | # quarter | Sampling 1 | Sampling 2 |
|-------------------------------------|-----------|------------|------------|
| <b>Aerococcus viridans</b>          | 6         | 7          | 9          |
| <b>Corynebacterium confusum</b>     | 1         | 0          | 1          |
| <b>Corynebacterium stationis</b>    | 1         | 0          | 1          |
| <b>Enterococcus faecium</b>         | 1         | 0          | 1          |
| <b>Pediococcus pentosaceus</b>      | 1         | 1          | 0          |
| <b>Staphylococcus aureus</b>        | 1         | 0          | 1          |
| <b>Staphylococcus epidermidis</b>   | 1         | 1          | 0          |
| <b>Staphylococcus hominis</b>       | 2         | 0          | 3          |
| <b>Staphylococcus saprophyticus</b> | 2         | 1          | 1          |
| <b>Streptococcus canis</b>          | 2         | 1          | 1          |
| <b>Streptococcus dysgalactiae</b>   | 2         | 3          | 4          |
| <b>Streptococcus oralis</b>         | 1         | 1          | 0          |

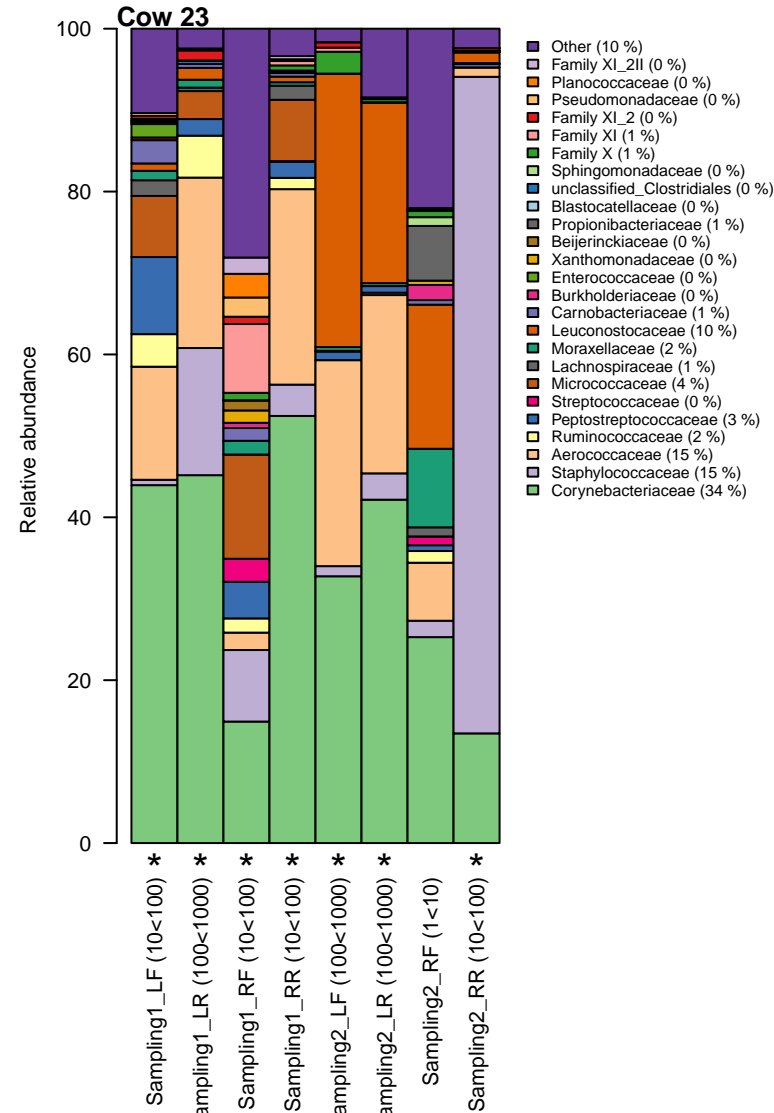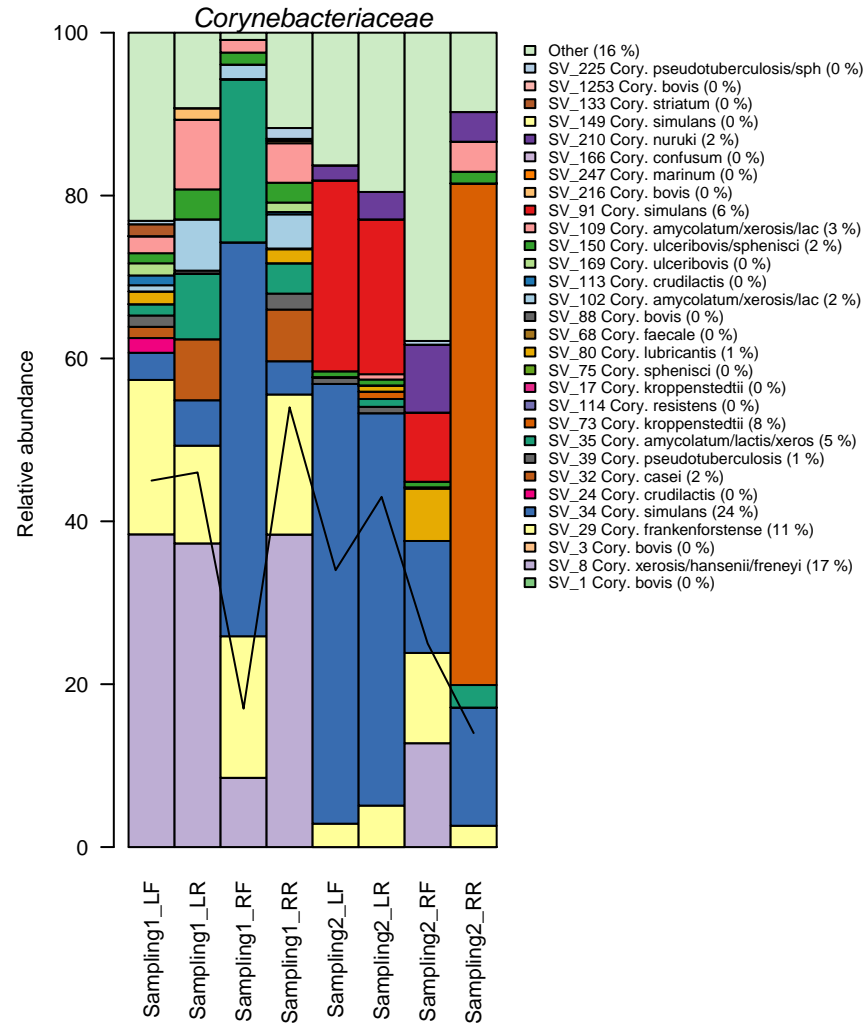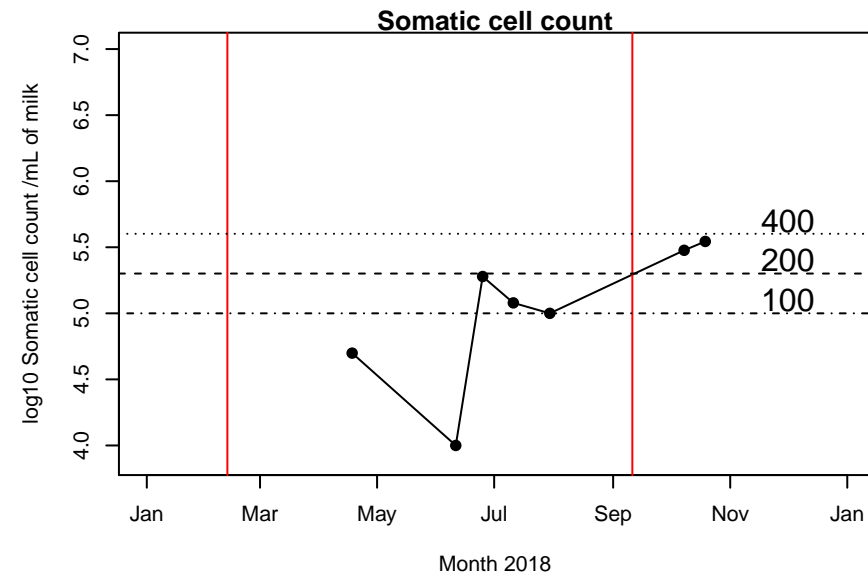

|                                    | # quarter | Sampling 1 | Sampling 2 |
|------------------------------------|-----------|------------|------------|
| <b>Aerococcus viridans</b>         | 8         | 6          | 8          |
| <b>Bacillus cereus</b>             | 2         | 0          | 2          |
| <b>Bacillus clausii</b>            | 1         | 0          | 1          |
| <b>Bacillus licheniformis</b>      | 2         | 0          | 2          |
| <b>Bacillus pumilus</b>            | 3         | 2          | 1          |
| <b>Corynebacterium amycolatum</b>  | 2         | 2          | 0          |
| <b>Corynebacterium sp</b>          | 1         | 1          | 0          |
| <b>Enterococcus gallinarum</b>     | 1         | 0          | 1          |
| <b>Pediococcus pentosaceus</b>     | 3         | 2          | 1          |
| <b>Staphylococcus epidermidis</b>  | 6         | 4          | 5          |
| <b>Staphylococcus haemolyticus</b> | 2         | 0          | 2          |
| <b>Staphylococcus hominis</b>      | 3         | 0          | 3          |

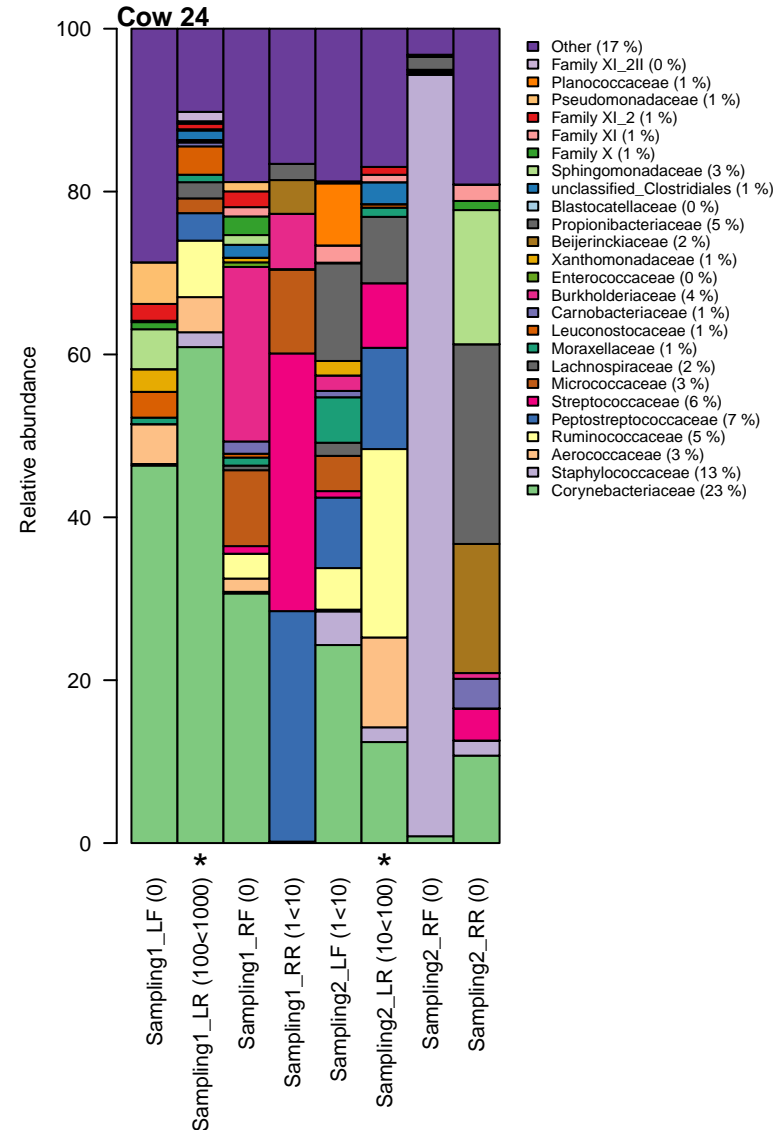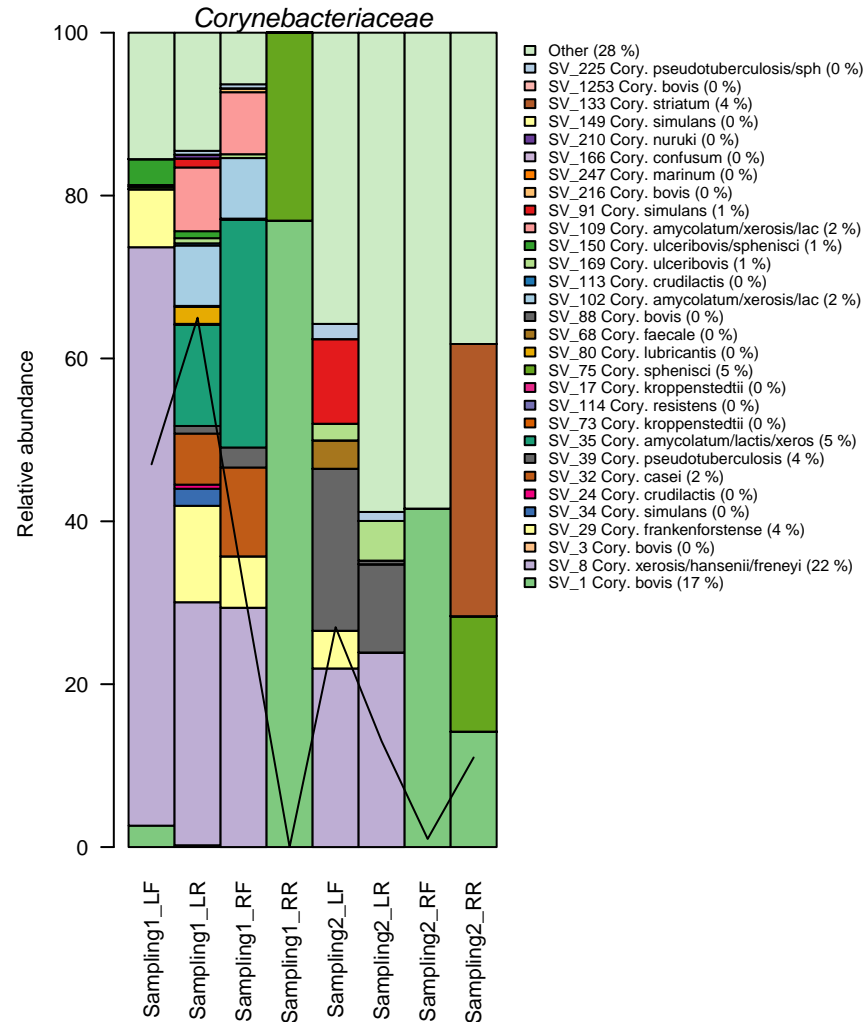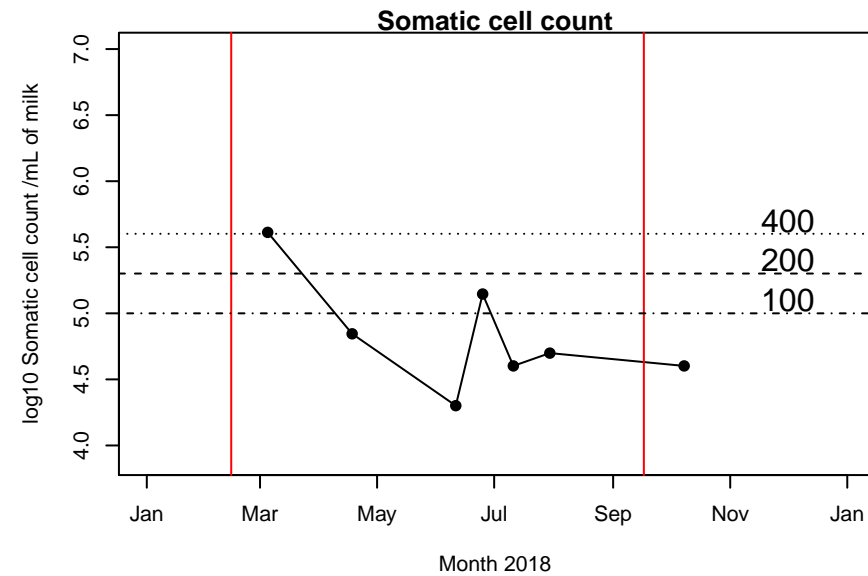

|                                     | # quarter | Sampling 1 | Sampling 2 |
|-------------------------------------|-----------|------------|------------|
| <b>Aerococcus viridans</b>          | 2         | 3          | 1          |
| <b>Corynebacterium amycolatum</b>   | 2         | 3          | 0          |
| <b>Escheria coli</b>                | 1         | 0          | 1          |
| <b>Lactobacillus pentosus</b>       | 1         | 1          | 0          |
| <b>Staphylococcus epidermidis</b>   | 2         | 3          | 2          |
| <b>Staphylococcus saprophyticus</b> | 1         | 1          | 0          |
| <b>Streptococcus lutetiensis</b>    | 1         | 0          | 1          |
| <b>Tetragenococcus solitarius</b>   | 1         | 1          | 0          |

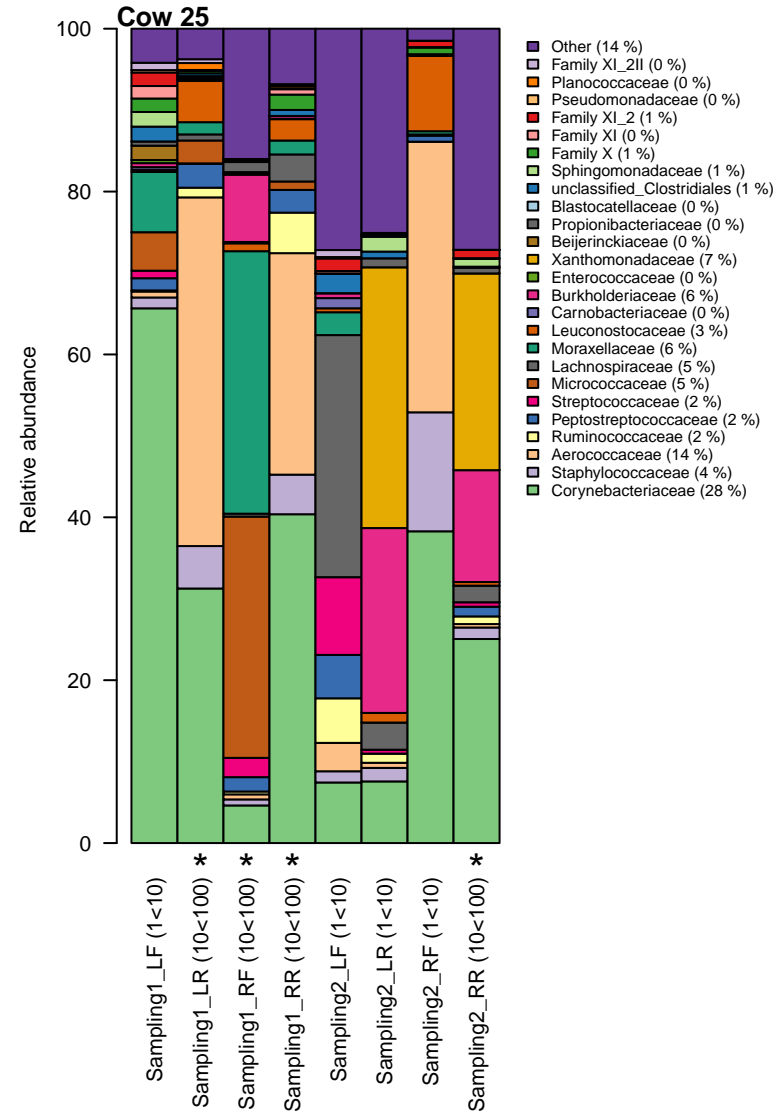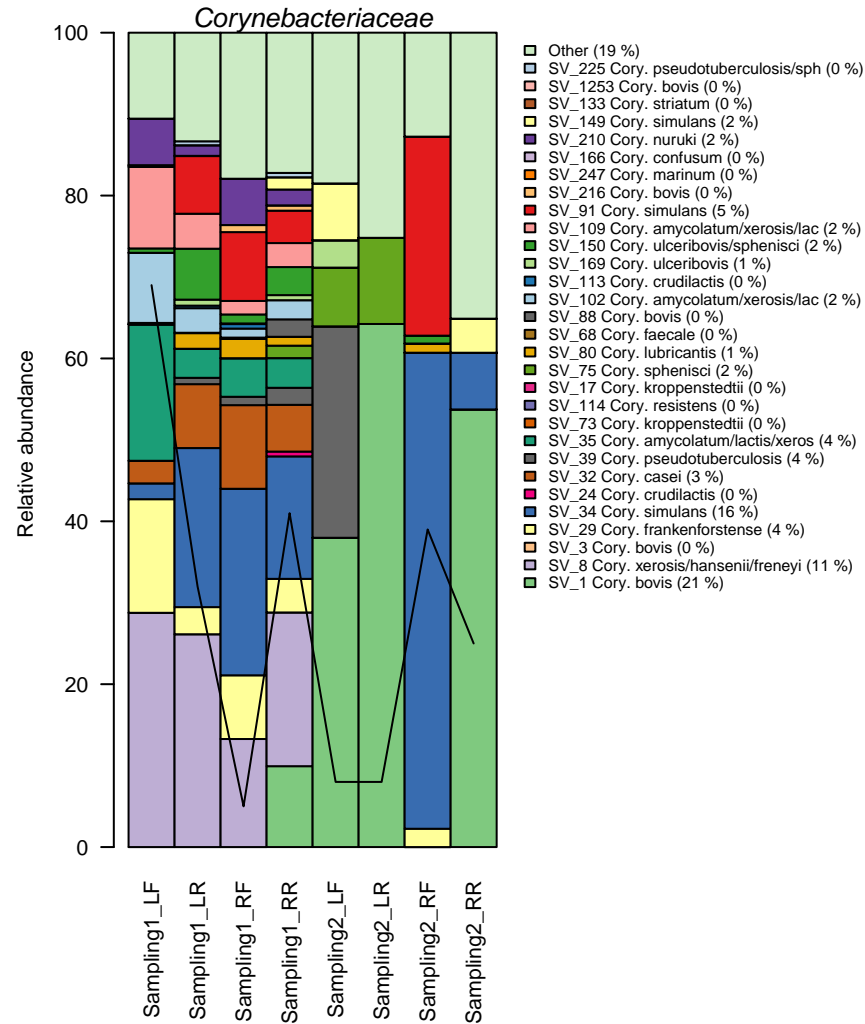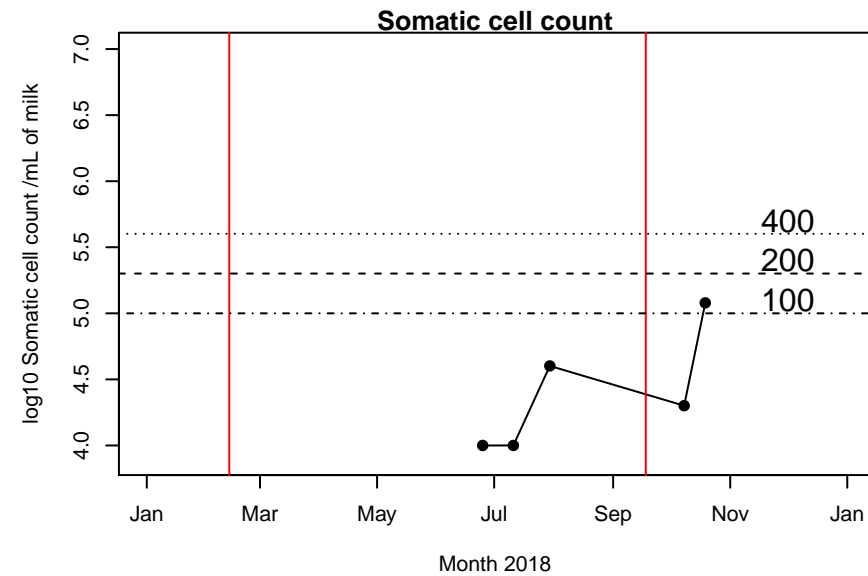

|                                    | # quarter | Sampling 1 |
|------------------------------------|-----------|------------|
| <i>Acinetobacter guillouiae</i>    | 1         | 1          |
| <i>Acinetobacter parvus</i>        | 1         | 1          |
| <i>Aerococcus viridans</i>         | 2         | 5          |
| <i>Bacillus licheniformis</i>      | 2         | 3          |
| <i>Bacillus pumilus</i>            | 1         | 1          |
| <i>Corynebacterium casei</i>       | 1         | 1          |
| <i>Globicatella sulfidifaciens</i> | 1         | 1          |
| <i>Lactobacillus paracasei</i>     | 1         | 1          |
| <i>Pediococcus pentosaceus</i>     | 1         | 1          |
| <i>Staphylococcus capitis</i>      | 1         | 1          |
| <i>Staphylococcus epidermidis</i>  | 2         | 4          |
| <i>Staphylococcus hominis</i>      | 2         | 2          |
| <i>Staphylococcus sciuri</i>       | 1         | 1          |
| <i>Staphylococcus warneri</i>      | 1         | 1          |
| <i>Streptococcus parauberis</i>    | 1         | 1          |

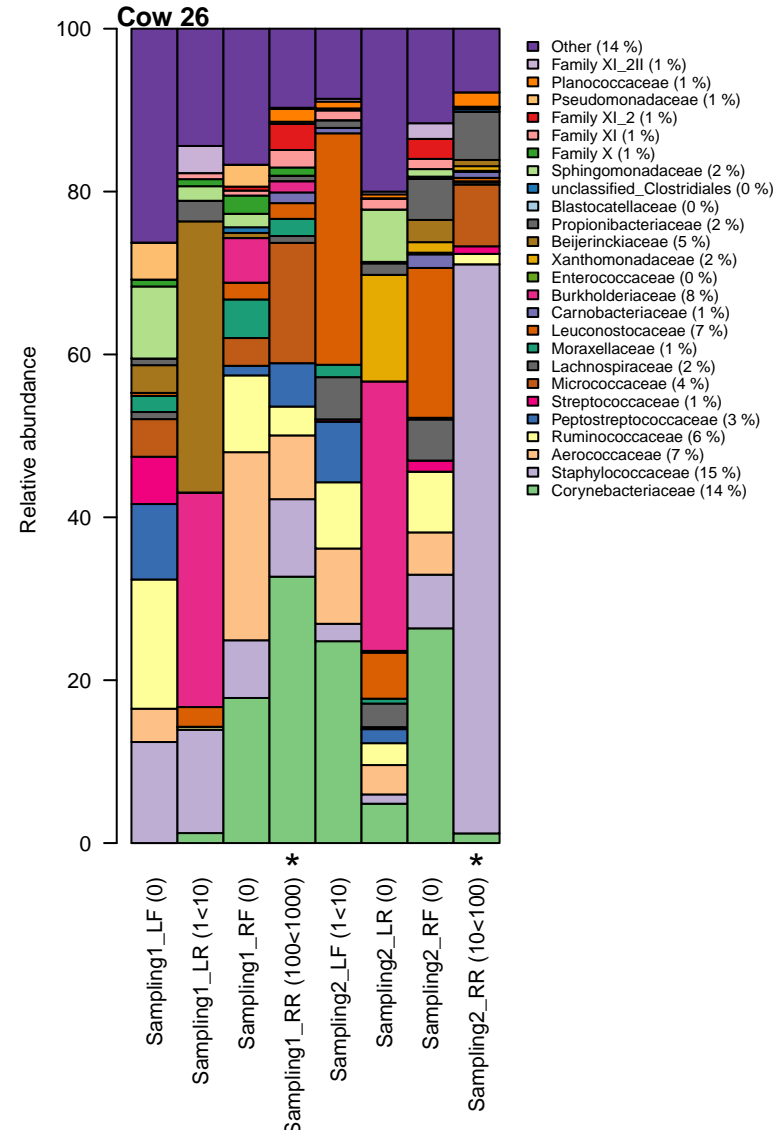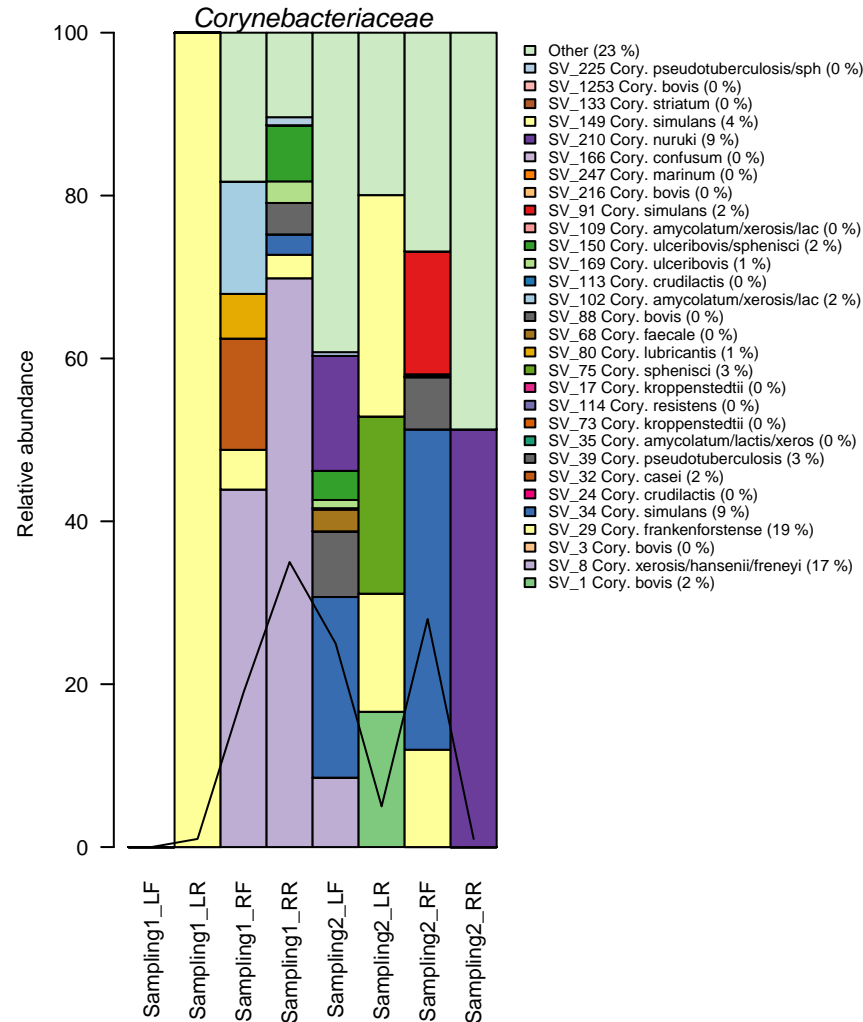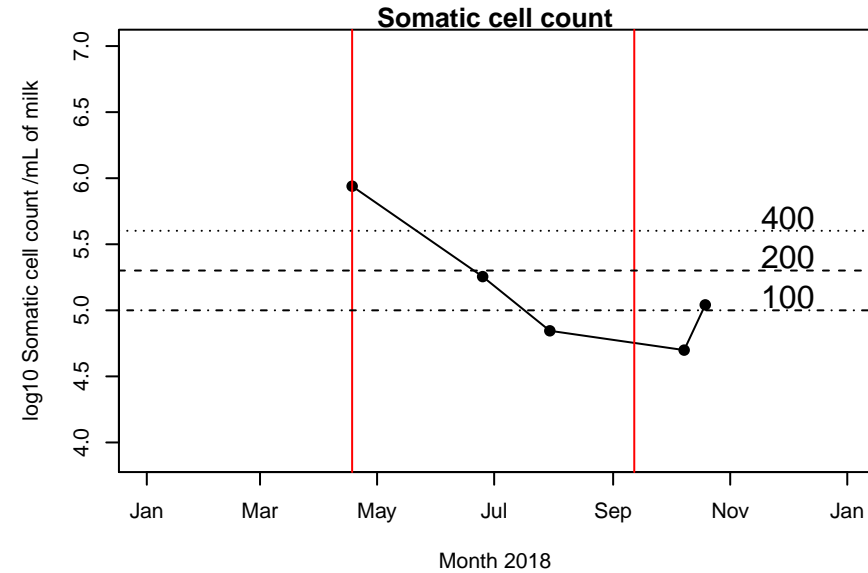

|                                   | # quarter | Sampling 1 | Sampling 2 |
|-----------------------------------|-----------|------------|------------|
| <b>Aerococcus viridans</b>        | 2         | 2          | 0          |
| <b>Bacillus licheniformis</b>     | 1         | 2          | 0          |
| <b>Bacillus pumilus</b>           | 1         | 2          | 0          |
| <b>Pediococcus pentosaceus</b>    | 2         | 1          | 1          |
| <b>Staphylococcus chromogenes</b> | 2         | 2          | 4          |
| <b>Staphylococcus hominis</b>     | 1         | 1          | 0          |
| <b>Staphylococcus simulans</b>    | 1         | 1          | 0          |

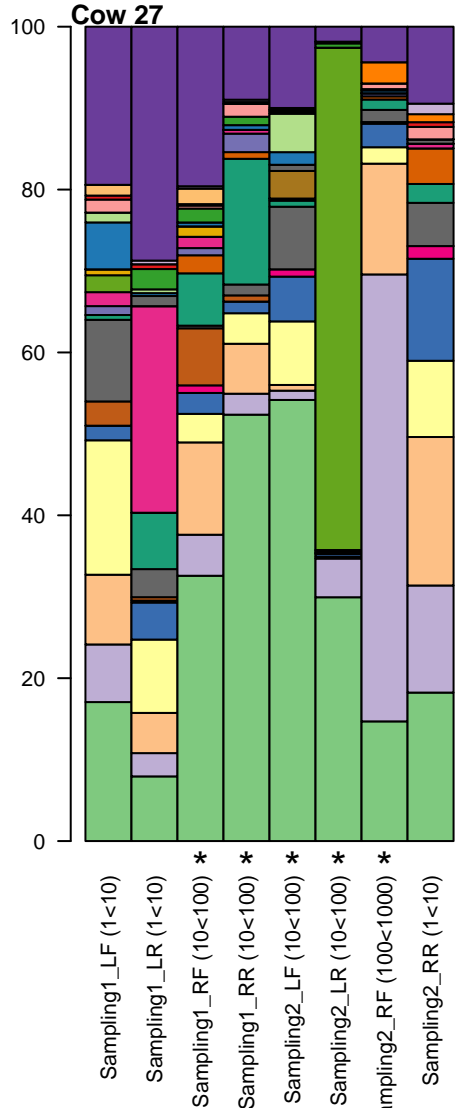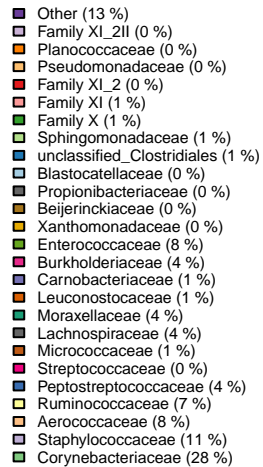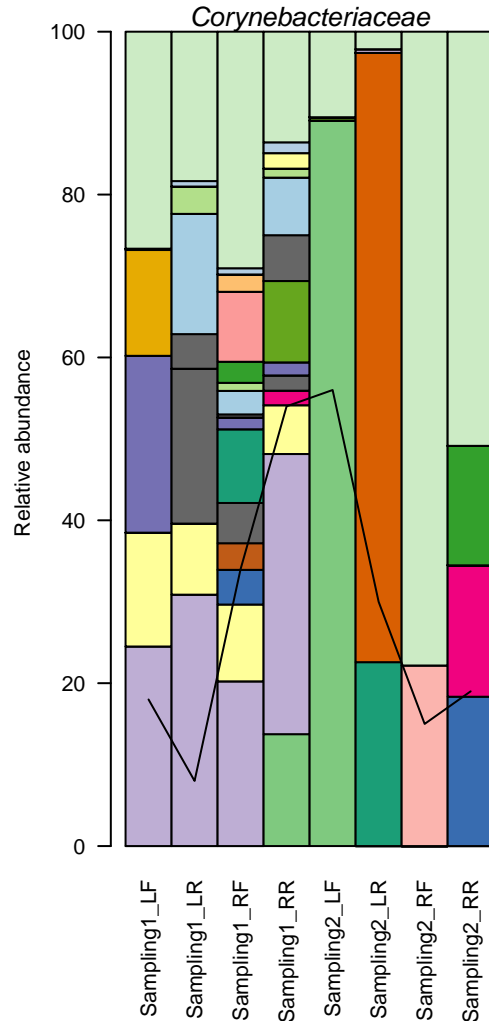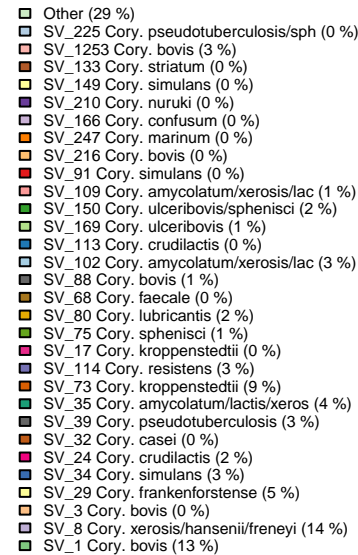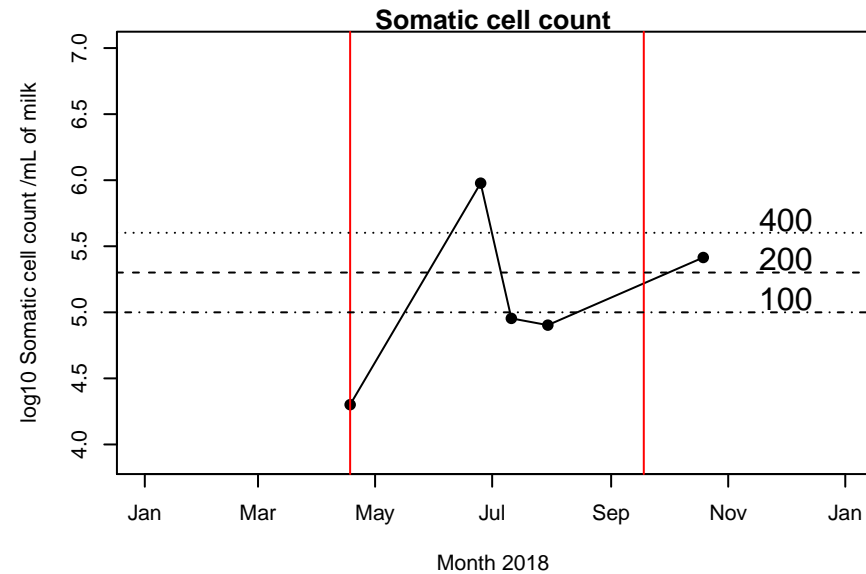

|                                    | # quarter | Sampling 1 |
|------------------------------------|-----------|------------|
| <b>Aerococcus viridans</b>         | 2         | 2          |
| <b>Bacillus licheniformis</b>      | 1         | 1          |
| <b>Bacillus pumilus</b>            | 1         | 2          |
| <b>Corynebacterium amycolatum</b>  | 1         | 1          |
| <b>Enterococcus faecalis</b>       | 1         | 3          |
| <b>Pediococcus pentosaceus</b>     | 1         | 1          |
| <b>Staphylococcus epidermidis</b>  | 3         | 4          |
| <b>Staphylococcus warneri</b>      | 1         | 1          |
| <b>Streptococcus pluranimalium</b> | 1         | 1          |

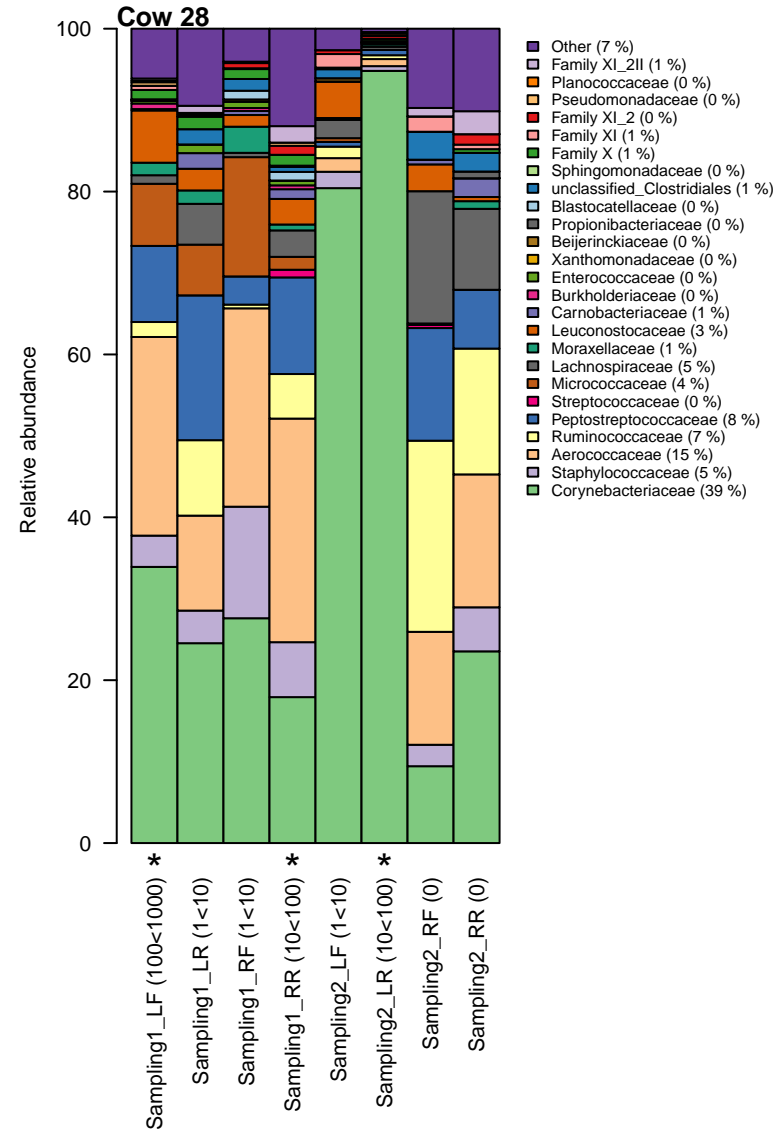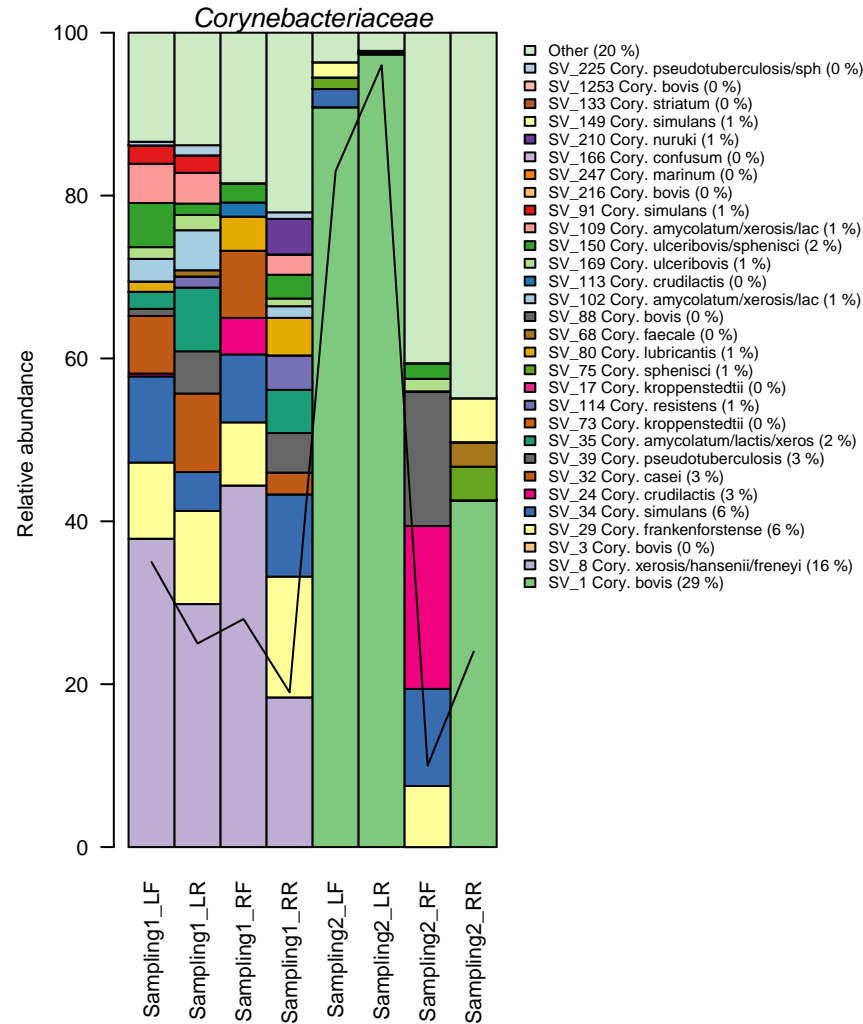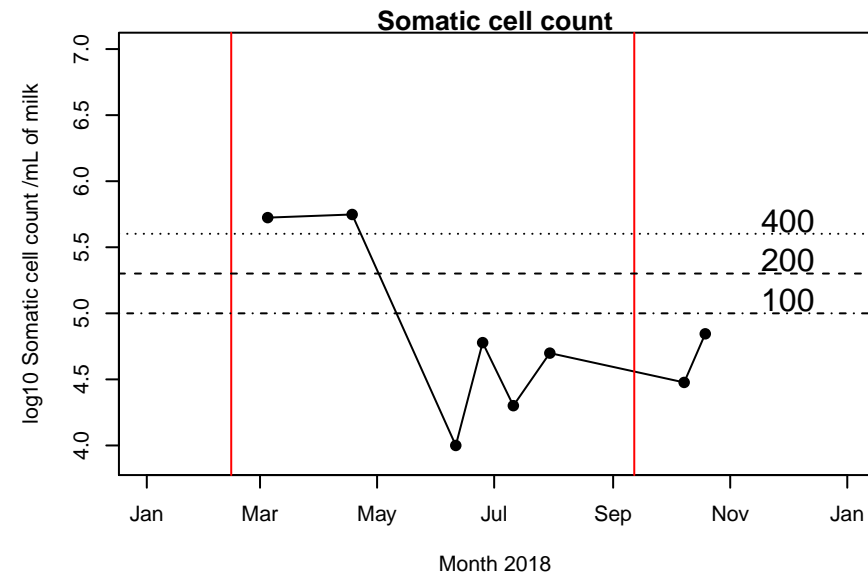

|                                    | # quarter | Sampling 1 | Sampling 2 |
|------------------------------------|-----------|------------|------------|
| <b>Aerococcus viridans</b>         | 3         | 4          | 1          |
| <b>Bacillus licheniformis</b>      | 1         | 1          | 0          |
| <b>Bacillus pumilus</b>            | 2         | 2          | 0          |
| <b>Corynebacterium amycolatum</b>  | 1         | 1          | 0          |
| <b>Corynebacterium bovis</b>       | 1         | 0          | 1          |
| <b>Corynebacterium sp</b>          | 1         | 0          | 1          |
| <b>Pediococcus pentosaceus</b>     | 2         | 3          | 0          |
| <b>Staphylococcus chromogenes</b>  | 1         | 1          | 0          |
| <b>Staphylococcus epidermidis</b>  | 3         | 6          | 0          |
| <b>Staphylococcus haemolyticus</b> | 1         | 1          | 0          |
| <b>Staphylococcus hominis</b>      | 1         | 0          | 1          |
| <b>Tetragenococcus solitarius</b>  | 2         | 2          | 0          |

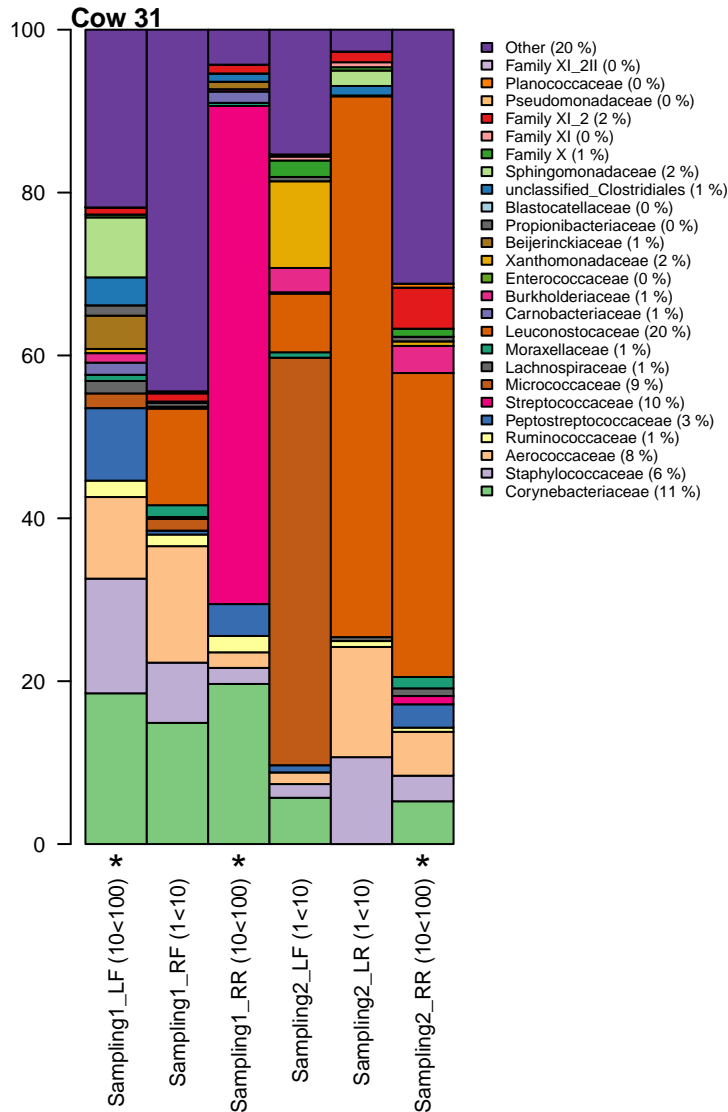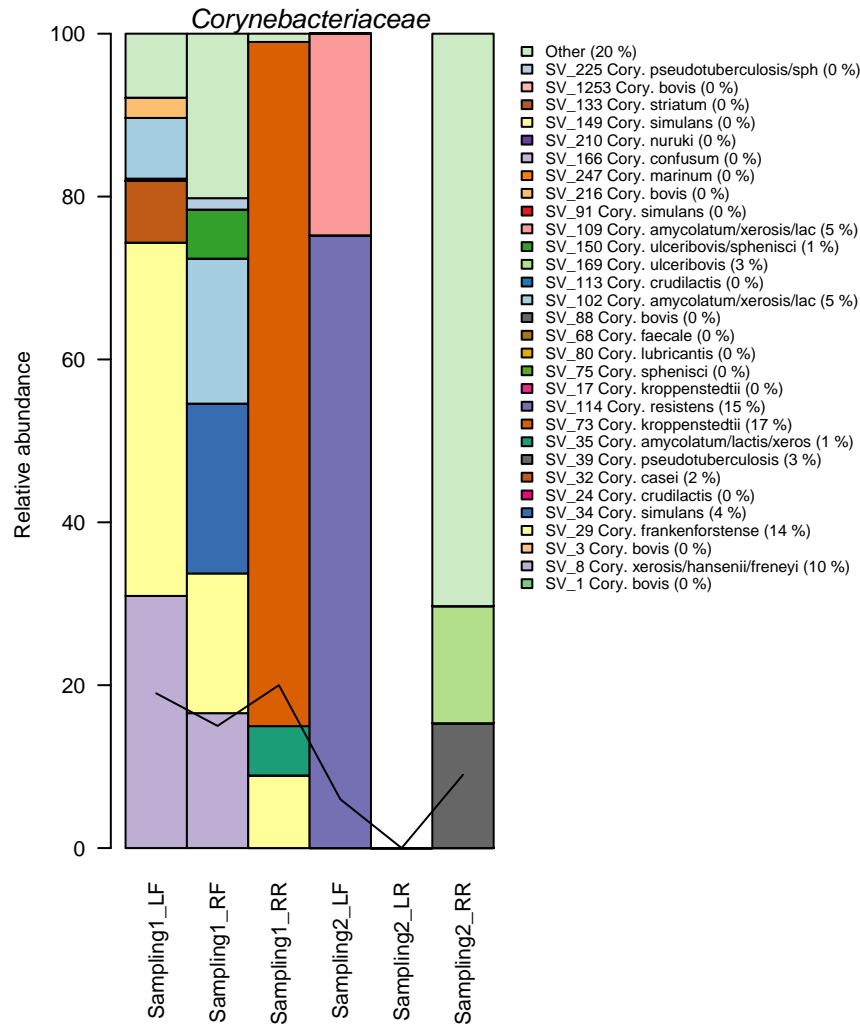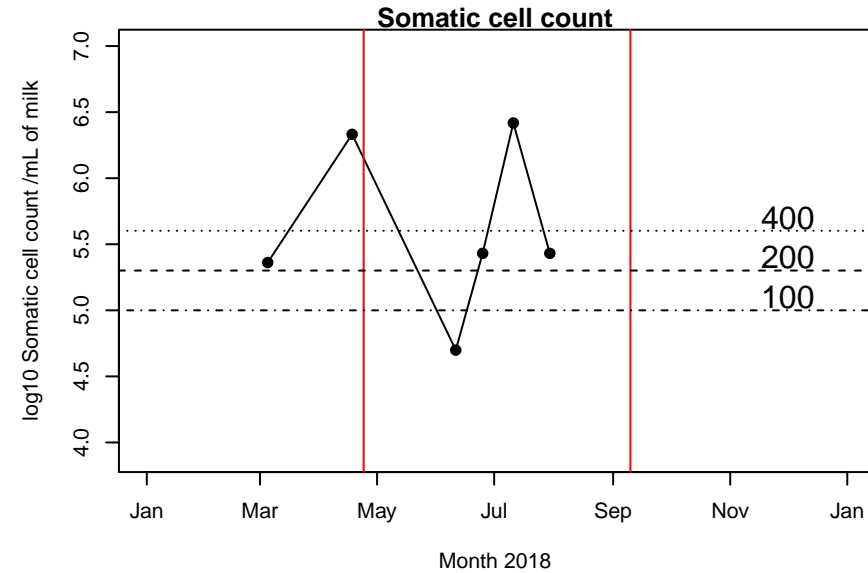

|                                   | # quarter | Sampling 1 | Sampling 2 |
|-----------------------------------|-----------|------------|------------|
| <b>Aerococcus viridans</b>        | 4         | 3          | 4          |
| <b>Corynebacterium amycolatum</b> | 1         | 0          | 1          |
| <b>Staphylococcus capitis</b>     | 1         | 3          | 0          |
| <b>Staphylococcus epidermidis</b> | 1         | 3          | 0          |
| <b>Streptococcus canis</b>        | 1         | 4          | 0          |
| <b>Streptococcus dysgalactiae</b> | 1         | 2          | 0          |



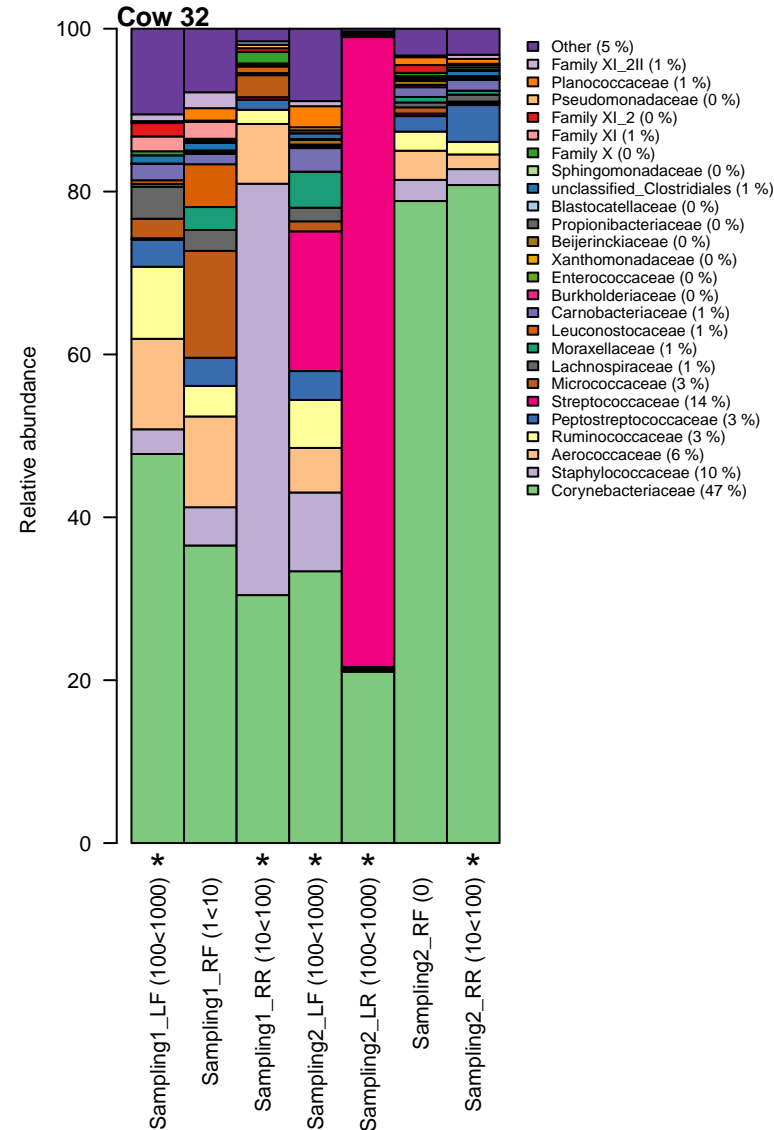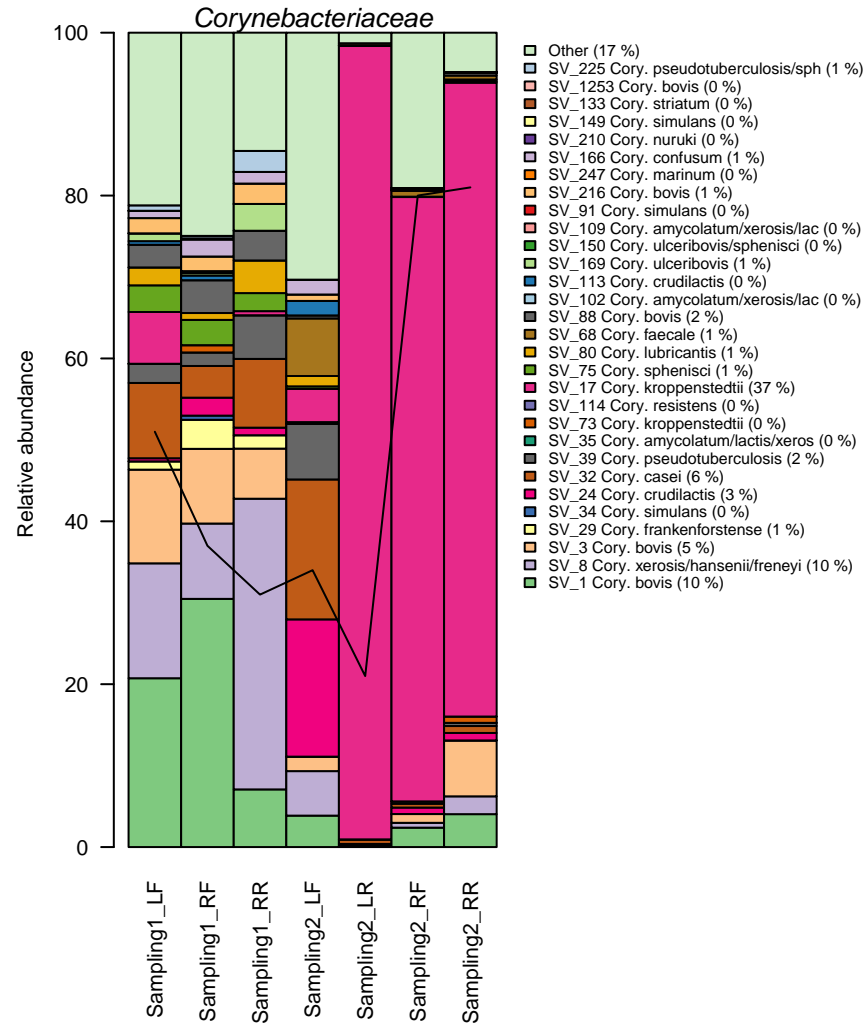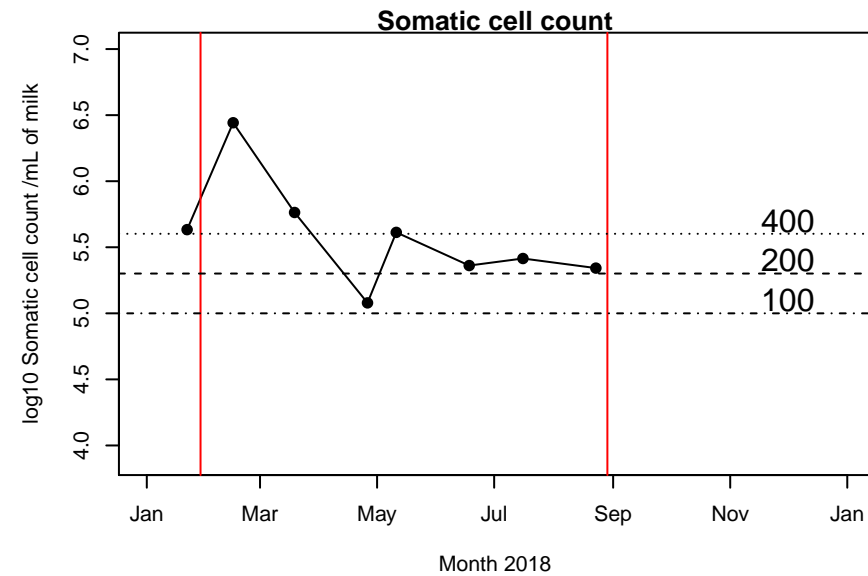

|                                     | # quarter | Sampling 1 | Sampling 2 |
|-------------------------------------|-----------|------------|------------|
| <b>Aerococcus viridans</b>          | 6         | 12         | 6          |
| <b>Corynebacterium confusum</b>     | 1         | 0          | 1          |
| <b>Corynebacterium sp</b>           | 1         | 0          | 1          |
| <b>Pediococcus pentosaceus</b>      | 1         | 1          | 0          |
| <b>Staphylococcus aureus</b>        | 1         | 0          | 1          |
| <b>Staphylococcus chromogenes</b>   | 2         | 0          | 5          |
| <b>Staphylococcus epidermidis</b>   | 2         | 4          | 0          |
| <b>Staphylococcus haemolyticus</b>  | 1         | 0          | 1          |
| <b>Staphylococcus hominis</b>       | 2         | 2          | 0          |
| <b>Staphylococcus saprophyticus</b> | 3         | 3          | 0          |
| <b>Streptococcus dysgalactiae</b>   | 1         | 1          | 0          |
| <b>Streptococcus uberis</b>         | 2         | 0          | 7          |

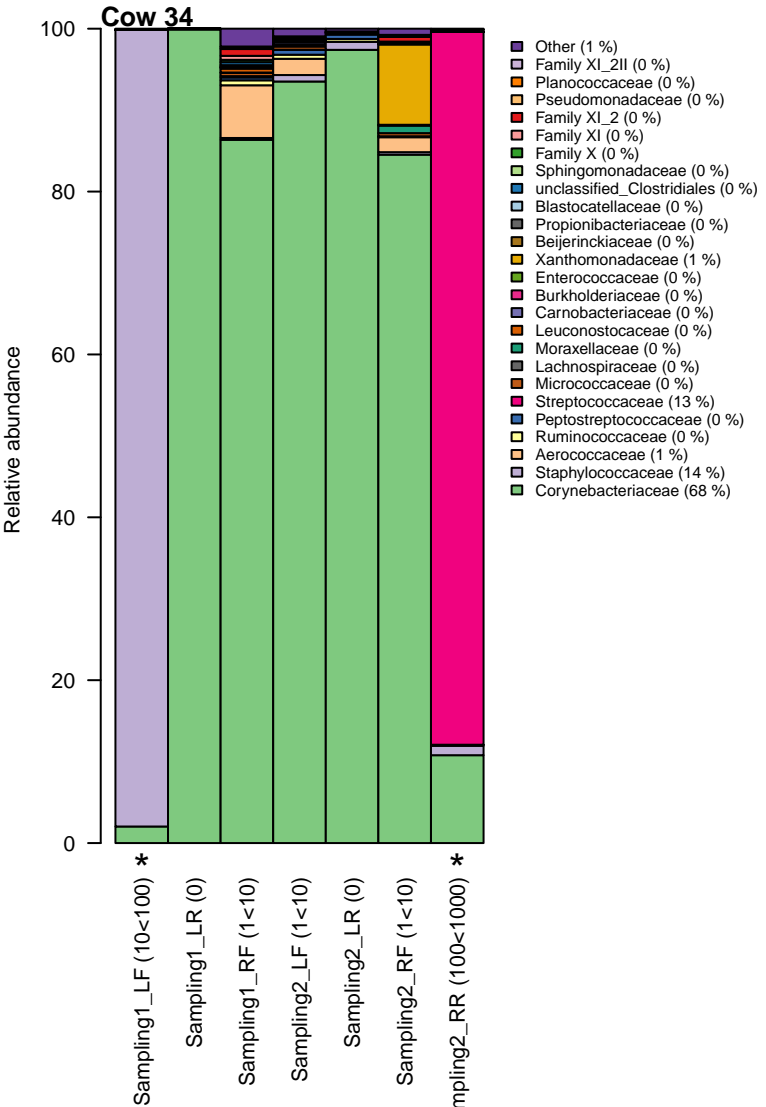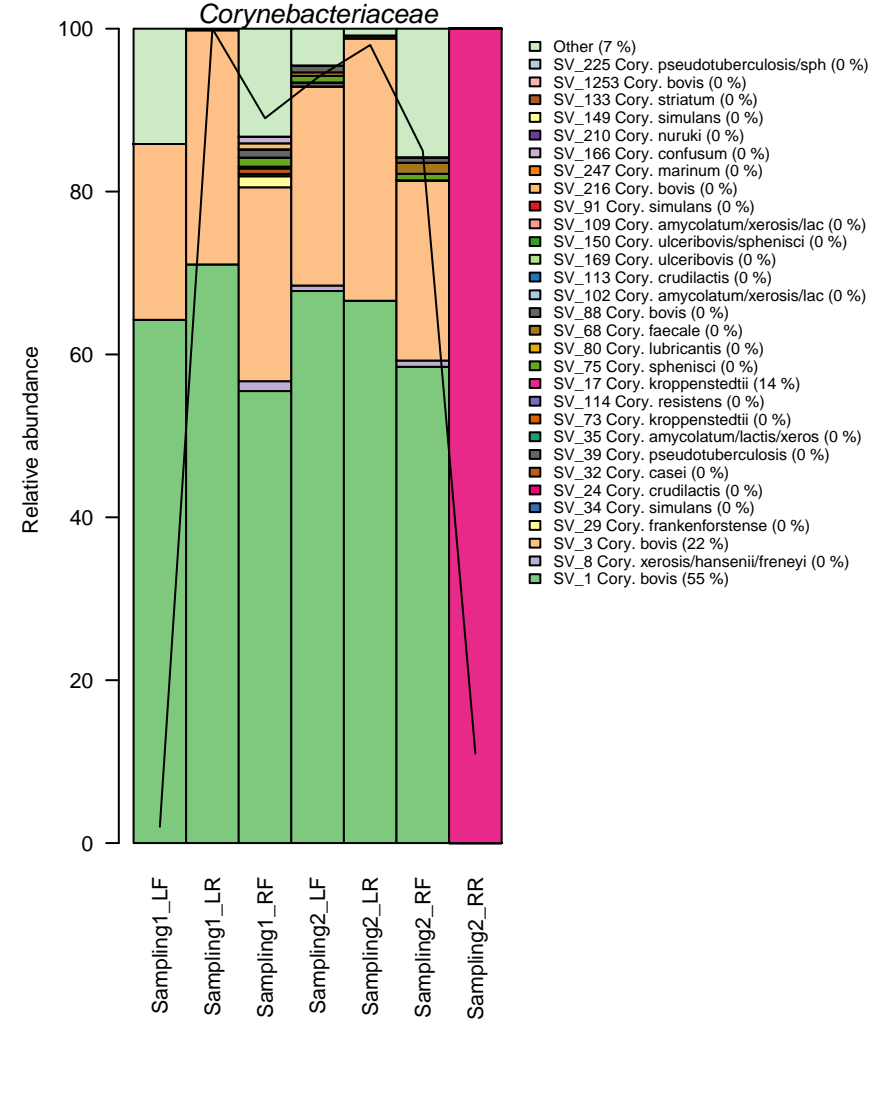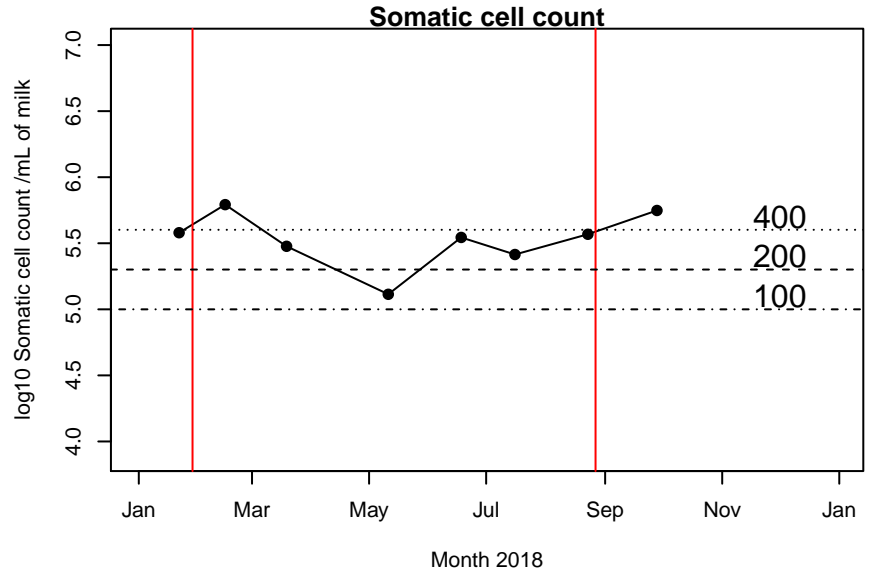

|                                   | # quarter | Sampling 1 | Sampling 2 |
|-----------------------------------|-----------|------------|------------|
| <b>Aerococcus viridans</b>        | 4         | 2          | 3          |
| <b>Pantoea agglomerans</b>        | 1         | 0          | 1          |
| <b>Staphylococcus epidermidis</b> | 1         | 5          | 0          |
| <b>Streptococcus uberis</b>       | 2         | 4          | 5          |

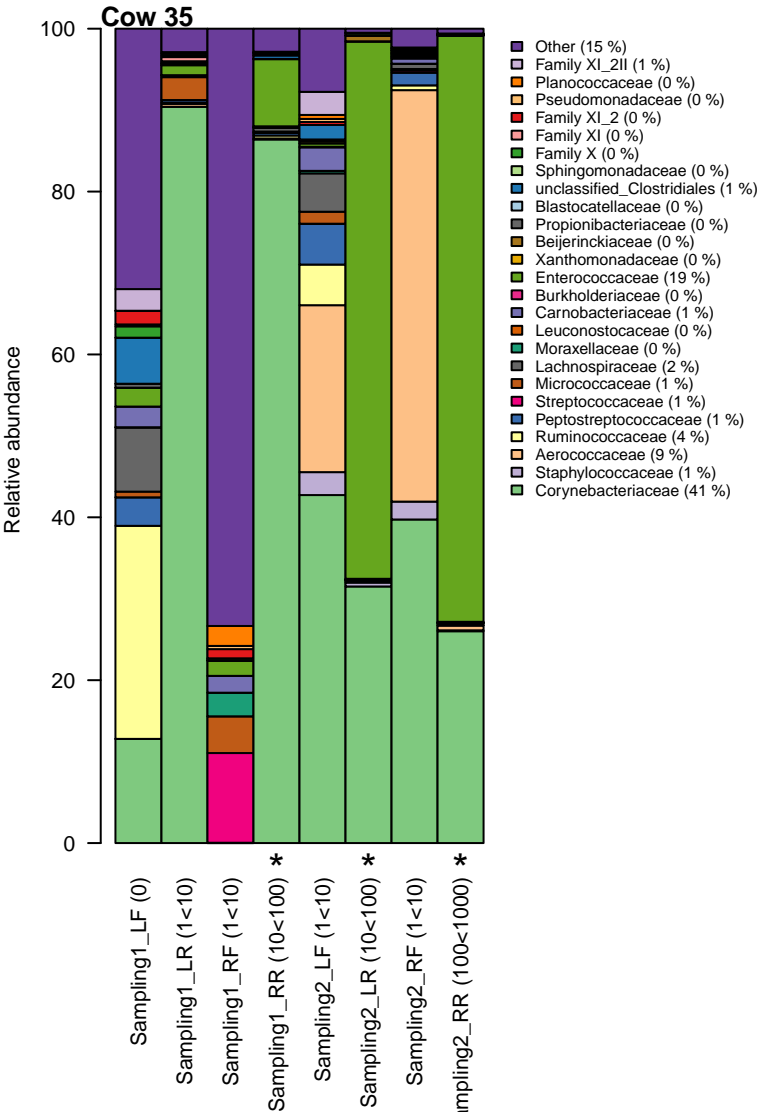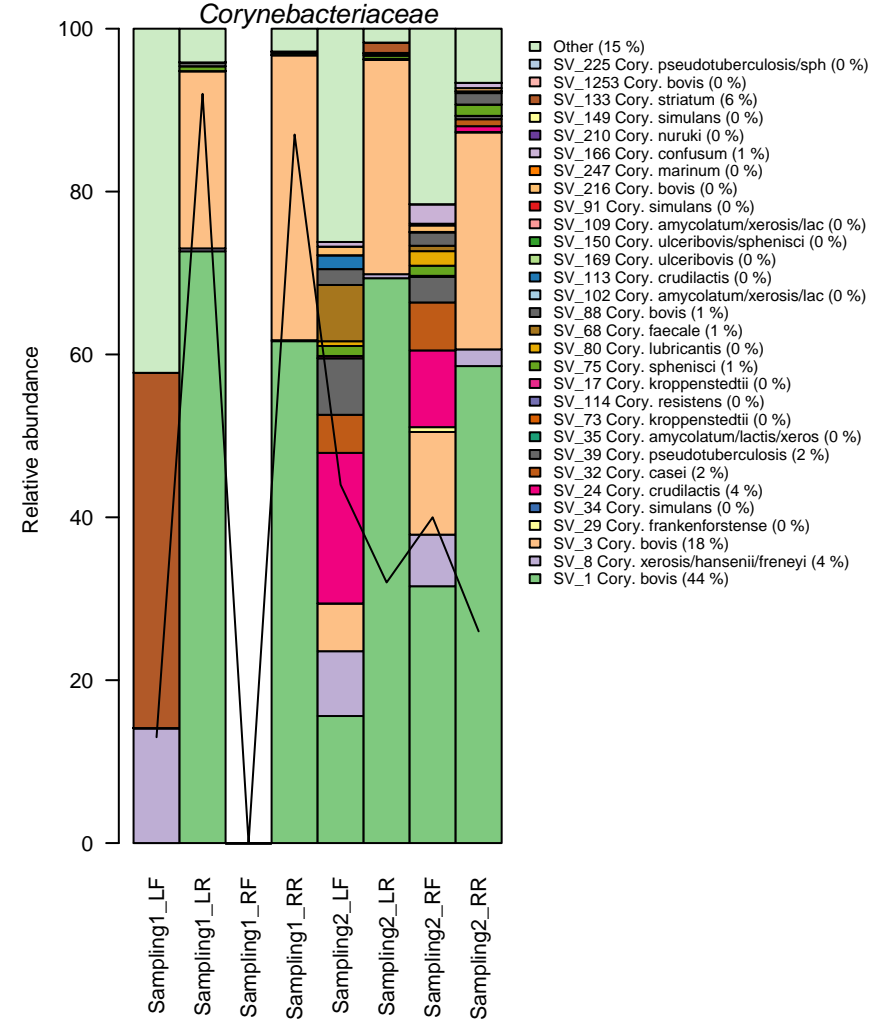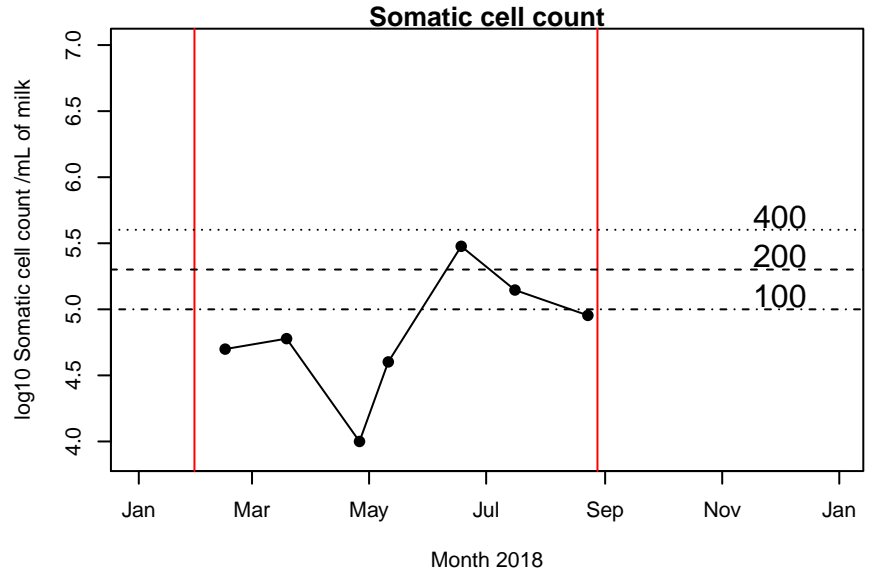

|                              | # quarter | Sampling 1 | Sampling 2 |
|------------------------------|-----------|------------|------------|
| <b>Aerococcus viridans</b>   | 2         | 0          | 4          |
| <b>Bacillus mycoides</b>     | 1         | 1          | 0          |
| <b>Enterococcus faecalis</b> | 4         | 15         | 8          |

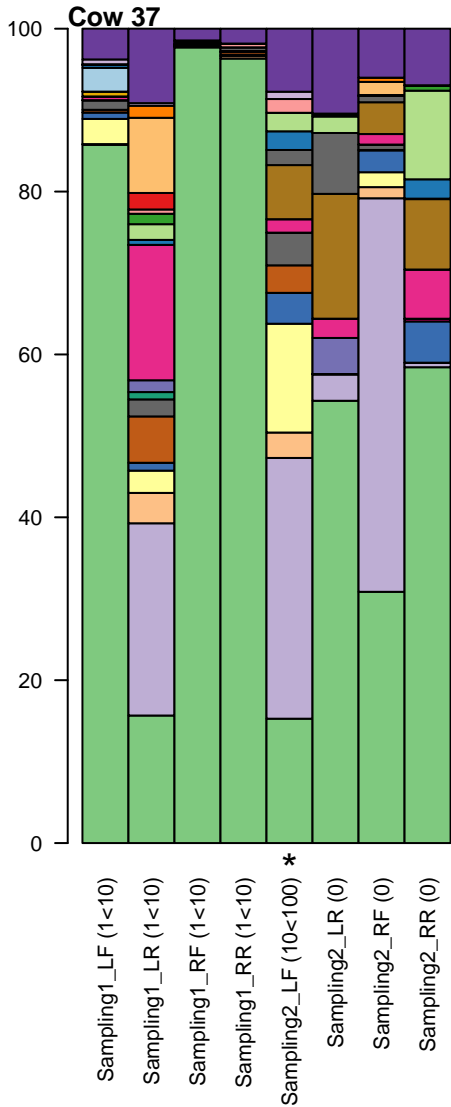

- Other (6%)
- Family XI\_2II (0%)
- Planococcaceae (0%)
- Pseudomonadaceae (1%)
- Family XI\_2 (0%)
- Family XI (0%)
- Family X (0%)
- Sphingomonadaceae (2%)
- unclassified\_Clostridiales (1%)
- Blastocatellaceae (0%)
- Propionibacteriaceae (1%)
- Beijerinckiaceae (4%)
- Xanthomonadaceae (0%)
- Enterococcaceae (0%)
- Burkholderiaceae (4%)
- Carnobacteriaceae (1%)
- Leuconostocaceae (0%)
- Moraxellaceae (0%)
- Lachnospiraceae (1%)
- Micrococcaceae (1%)
- Streptococcaceae (0%)
- Peptostreptococcaceae (2%)
- Ruminococcaceae (3%)
- Aerococcaceae (1%)
- Staphylococcaceae (13%)
- Corynebacteriaceae (57%)

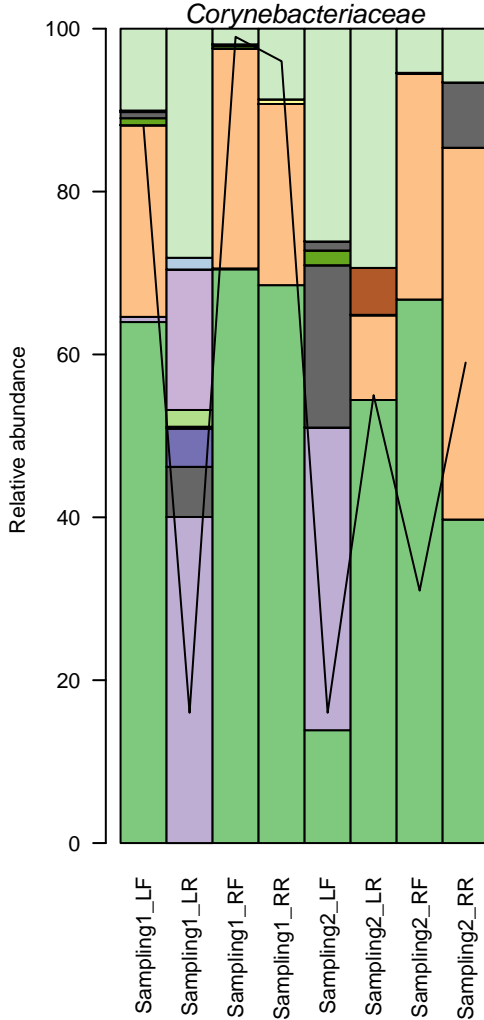

- Other (15%)
- SV\_225 Cory. pseudotuberculosis/sph (0%)
- SV\_1253 Cory. bovis (0%)
- SV\_133 Cory. striatum (1%)
- SV\_149 Cory. simulans (0%)
- SV\_210 Cory. nuruki (0%)
- SV\_166 Cory. confusum (2%)
- SV\_247 Cory. marinum (0%)
- SV\_216 Cory. bovis (0%)
- SV\_91 Cory. simulans (0%)
- SV\_109 Cory. amycolatum/xerosis/lac (0%)
- SV\_150 Cory. ulceribovis/sphenisci (0%)
- SV\_169 Cory. ulceribovis (0%)
- SV\_113 Cory. crudilactis (0%)
- SV\_102 Cory. amycolatum/xerosis/lac (0%)
- SV\_88 Cory. bovis (0%)
- SV\_68 Cory. faecale (0%)
- SV\_80 Cory. lubricantis (0%)
- SV\_75 Cory. sphenisci (0%)
- SV\_17 Cory. kroppenstedtii (0%)
- SV\_114 Cory. resistens (1%)
- SV\_73 Cory. kroppenstedtii (0%)
- SV\_35 Cory. amycolatum/lactis/xeros (0%)
- SV\_39 Cory. pseudotuberculosis (4%)
- SV\_32 Cory. casei (0%)
- SV\_24 Cory. crudilactis (0%)
- SV\_34 Cory. simulans (0%)
- SV\_29 Cory. frankenforstense (0%)
- SV\_3 Cory. bovis (20%)
- SV\_8 Cory. xerosis/hansenii/freneyi (10%)
- SV\_1 Cory. bovis (47%)

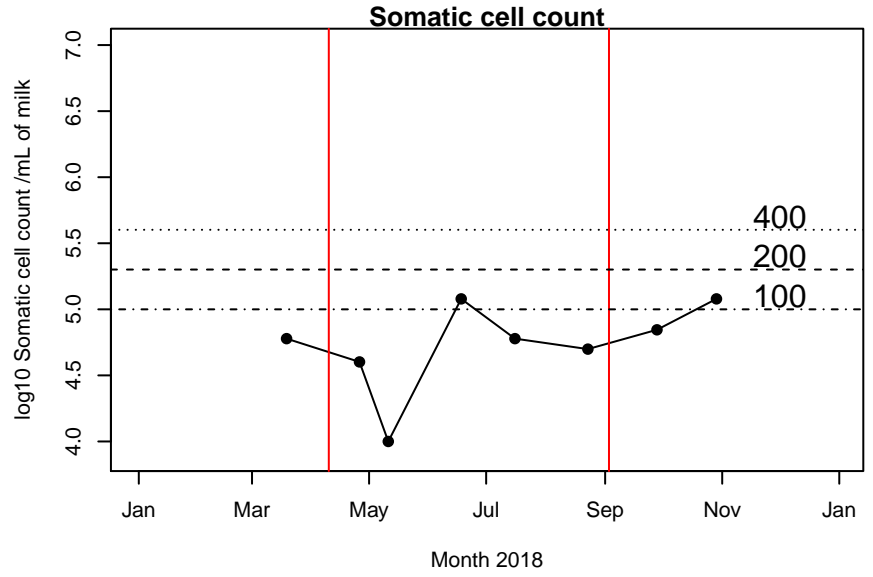

|                                    | # quarter | Sampling 2 |
|------------------------------------|-----------|------------|
| <b>Corynebacterium bovis</b>       | 1         | 1          |
| <b>Staphylococcus haemolyticus</b> | 1         | 1          |

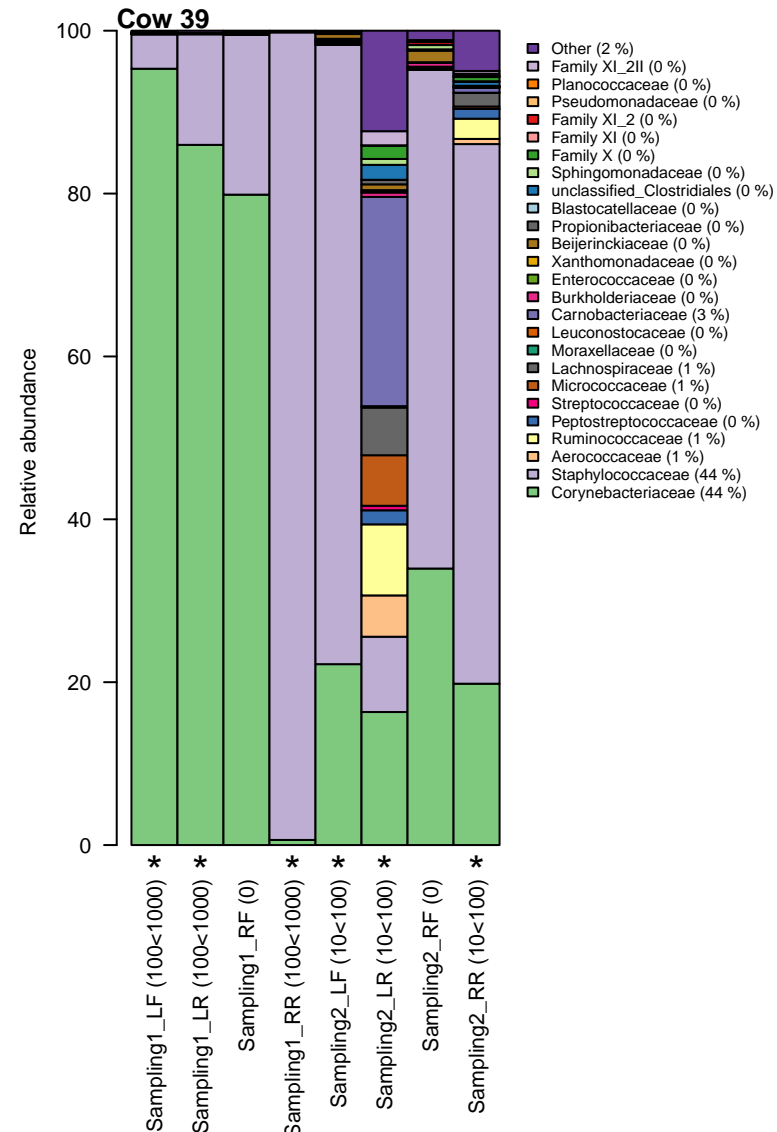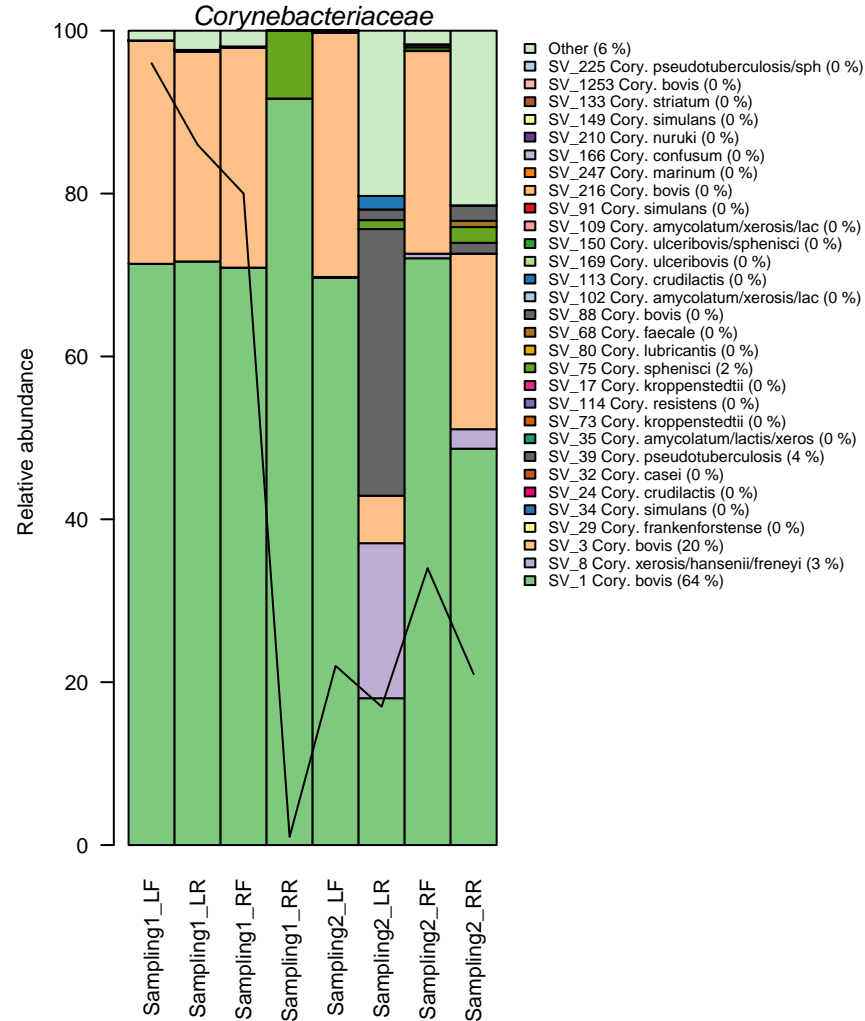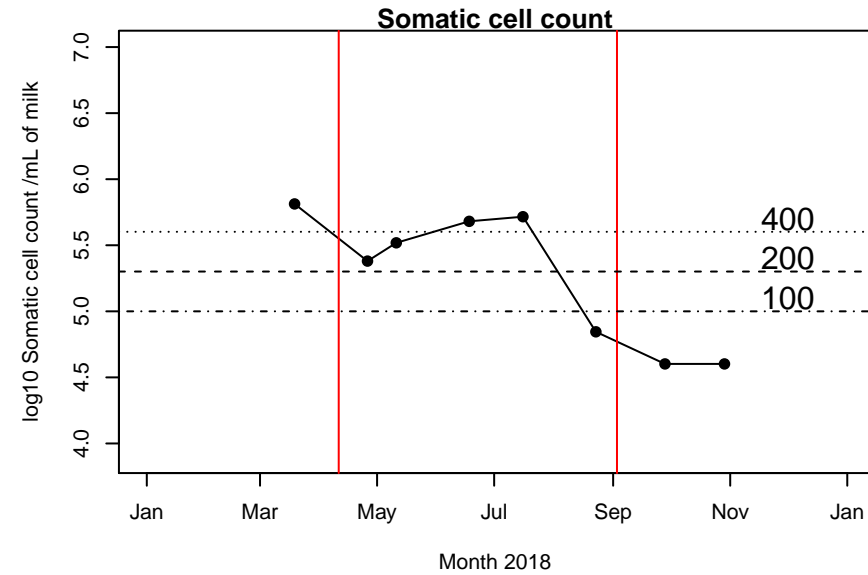

|                                    | # quarter | Sampling 1 | Sampling 2 |
|------------------------------------|-----------|------------|------------|
| <b>Aerococcus viridans</b>         | 1         | 0          | 1          |
| <b>Corynebacterium bovis</b>       | 1         | 0          | 1          |
| <b>Staphylococcus epidermidis</b>  | 3         | 7          | 1          |
| <b>Staphylococcus haemolyticus</b> | 2         | 1          | 2          |

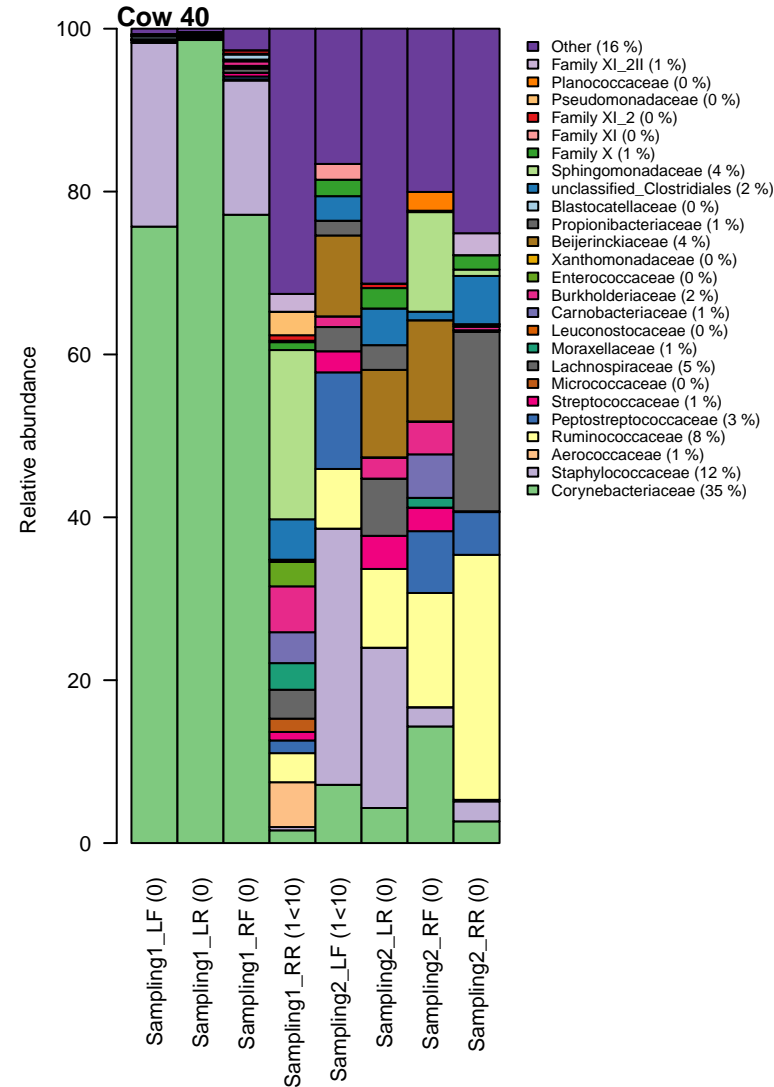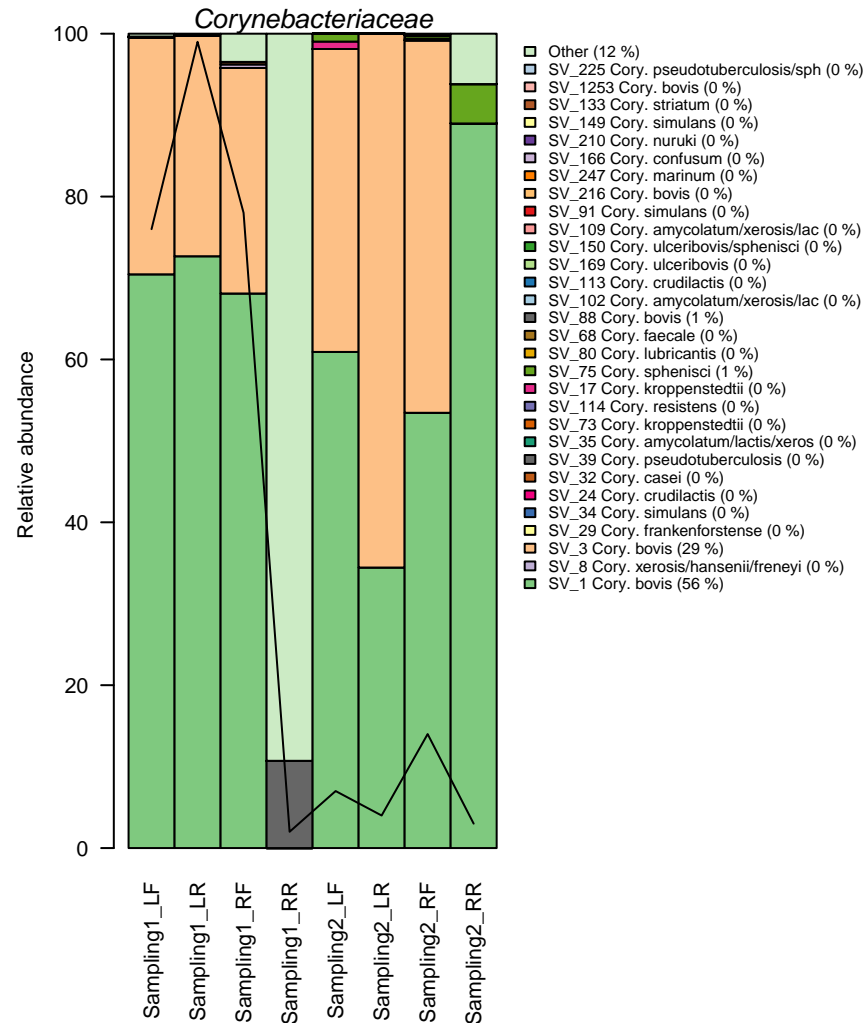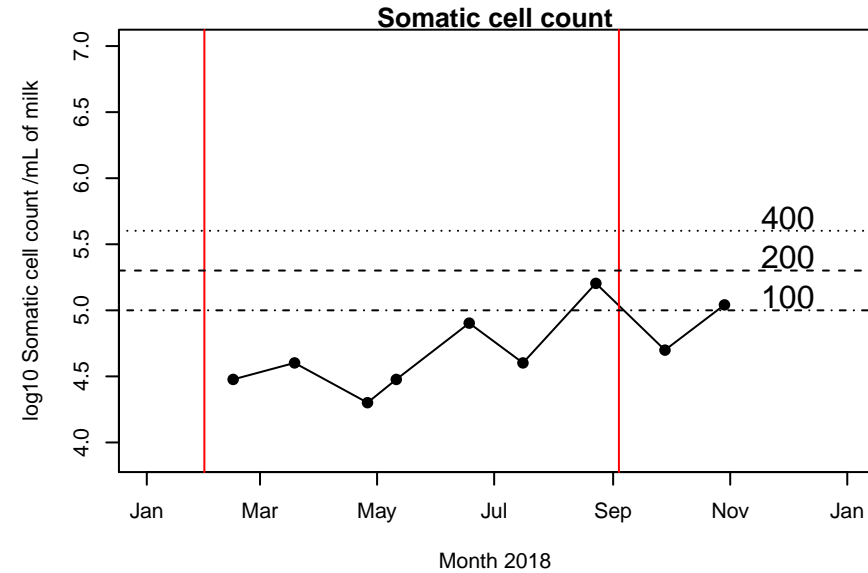

|                                    | # quarter | Sampling 1 | Sampling 2 |
|------------------------------------|-----------|------------|------------|
| <b>Aerococcus viridans</b>         | 1         | 1          | 0          |
| <b>Staphylococcus haemolyticus</b> | 1         | 0          | 2          |

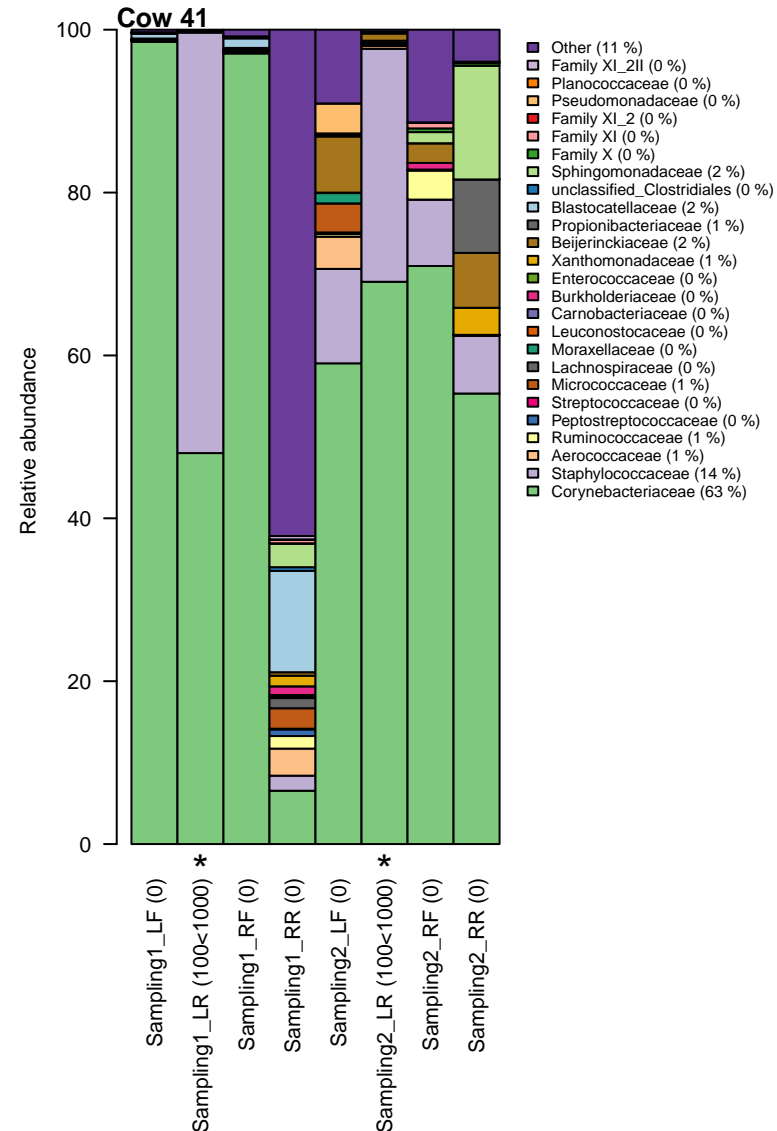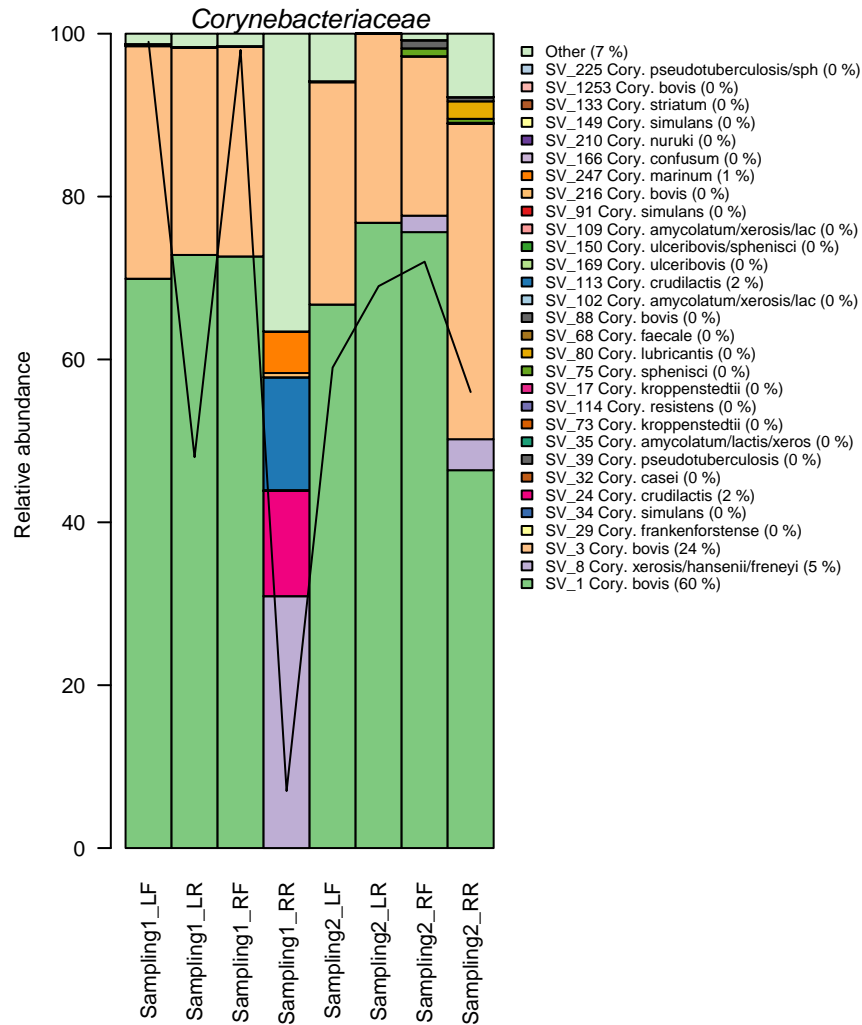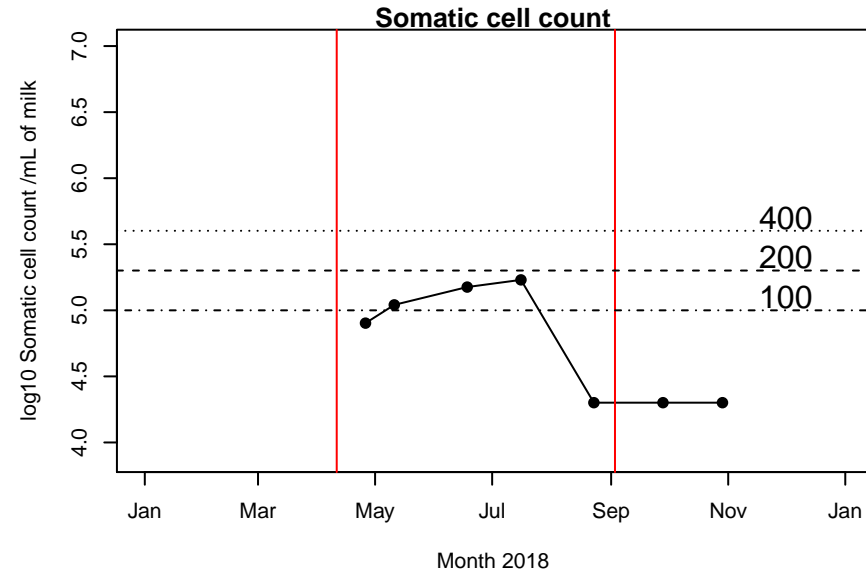

Staphylococcus epidermidis

# quarter  
2

Sampling 1  
7

Sampling 2  
4

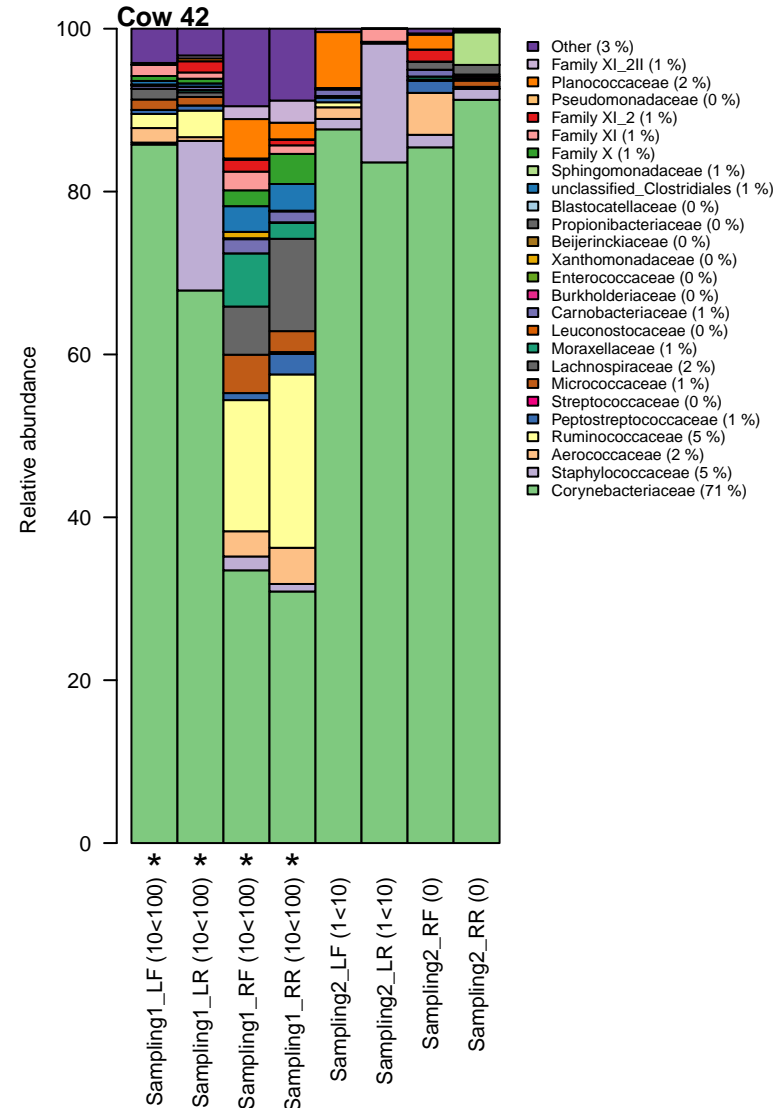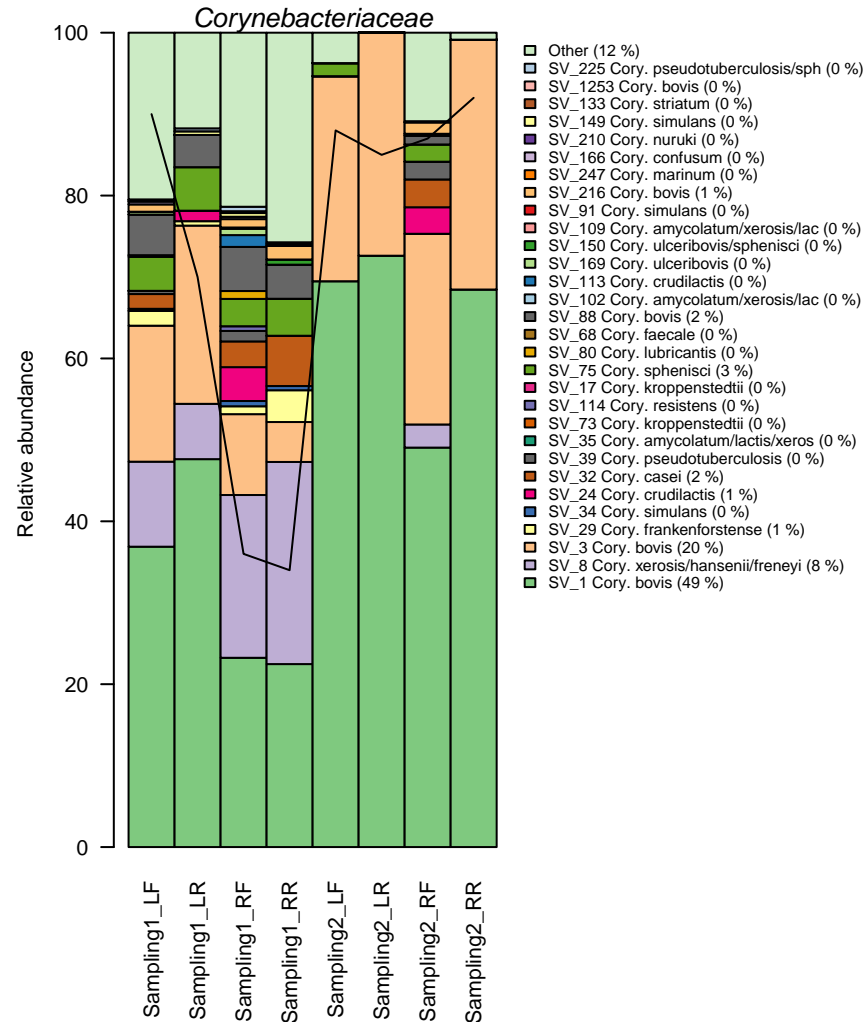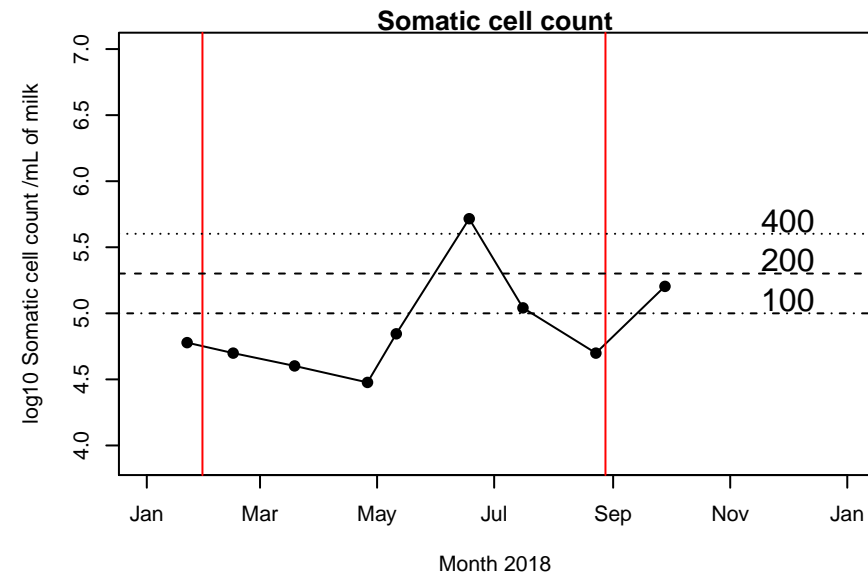

|                                   | # quarter | Sampling 1 | Sampling 2 |
|-----------------------------------|-----------|------------|------------|
| <b>Acinetobacter lwoffii</b>      | 1         | 1          | 0          |
| <b>Aerococcus viridans</b>        | 5         | 13         | 1          |
| <b>Corynebacterium confusum</b>   | 1         | 1          | 0          |
| <b>Corynebacterium stationis</b>  | 1         | 1          | 0          |
| <b>Staphylococcus chromogenes</b> | 2         | 5          | 1          |
| <b>Staphylococcus epidermidis</b> | 1         | 1          | 0          |



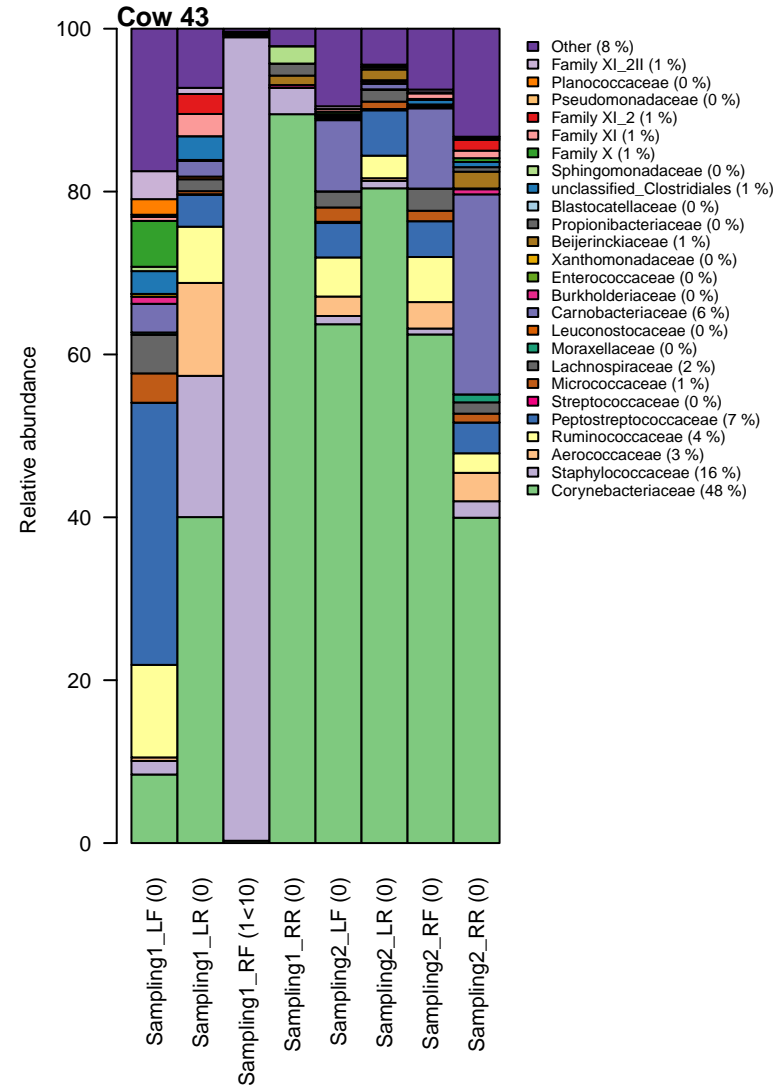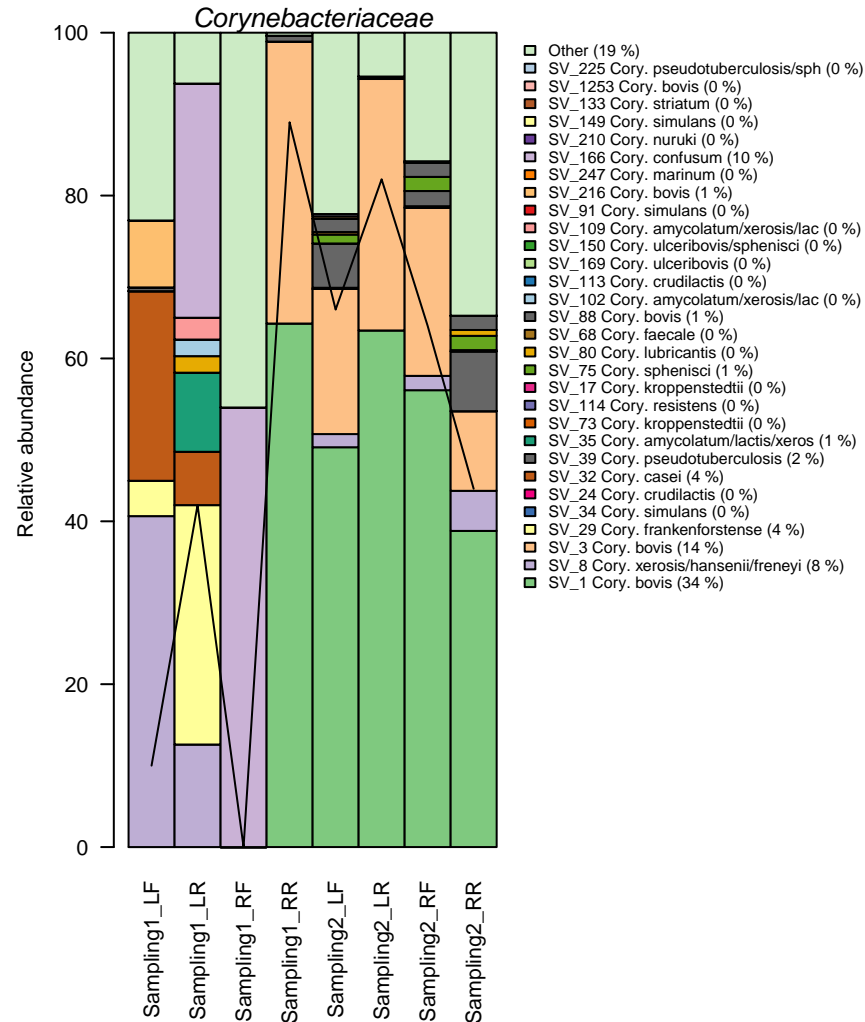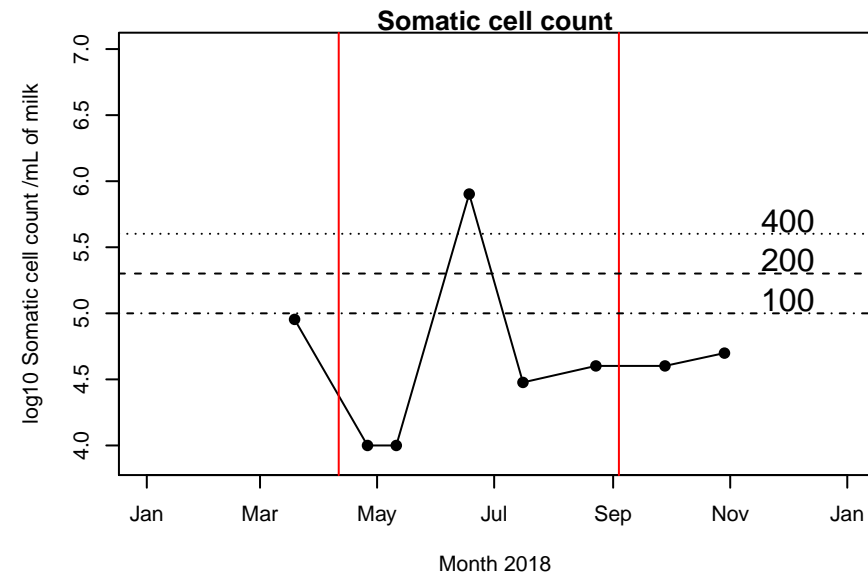

Staphylococcus epidermidis # quarter 1 Sampling 1 2

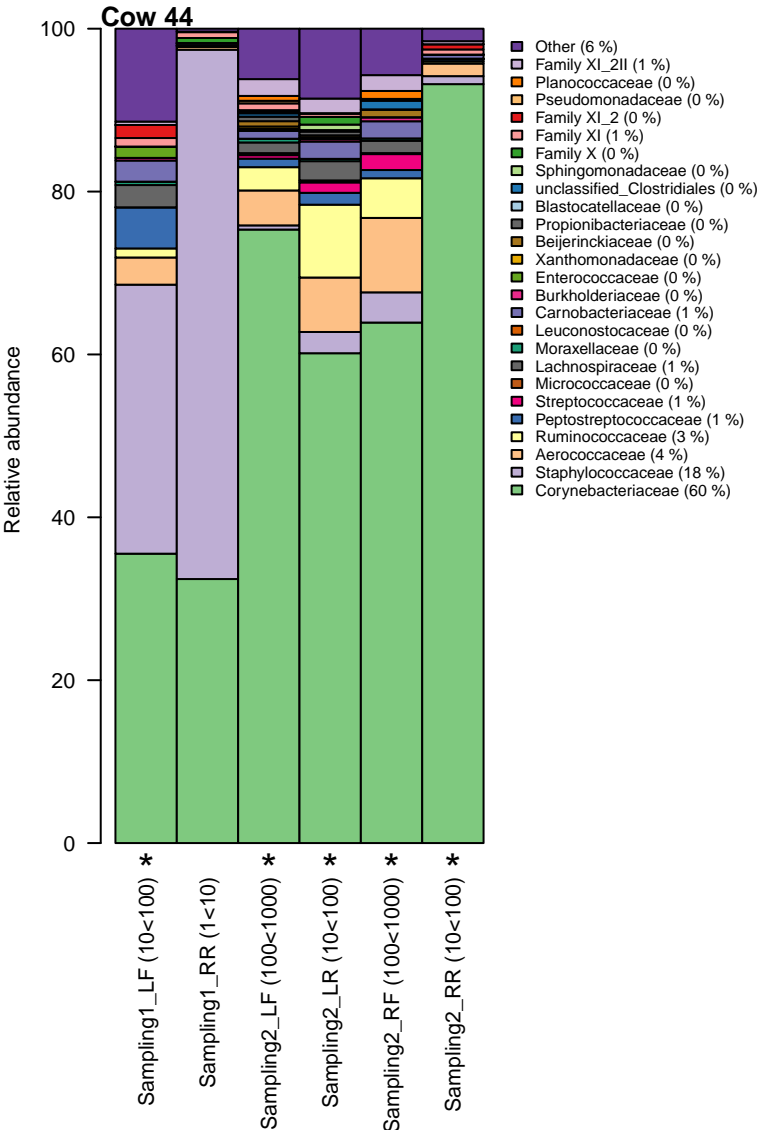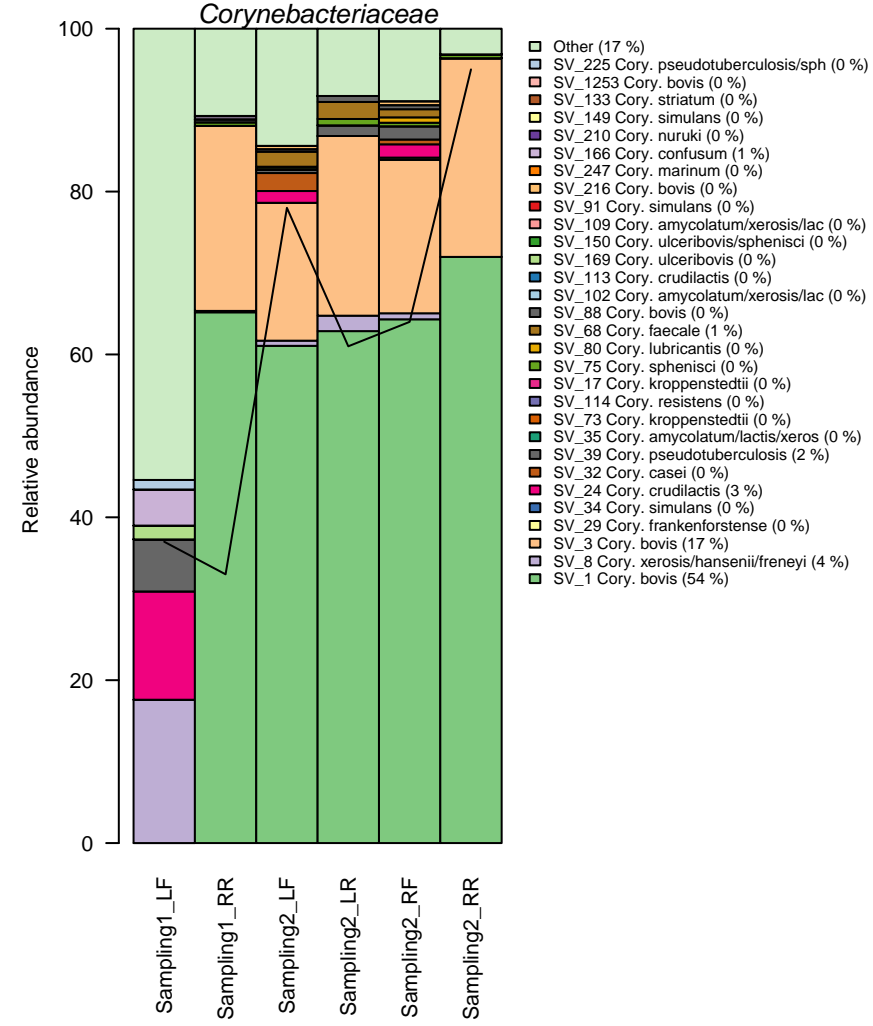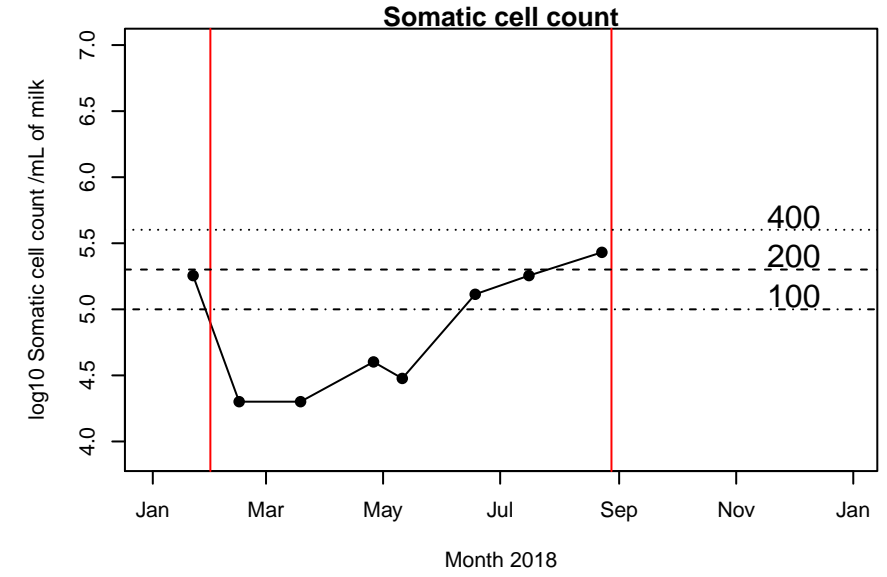

|                                     | # quarter | Sampling 1 | Sampling 2 |
|-------------------------------------|-----------|------------|------------|
| <b>Aerococcus viridans</b>          | 6         | 2          | 10         |
| <b>Corynebacterium bovis</b>        | 3         | 0          | 3          |
| <b>Corynebacterium confusum</b>     | 1         | 1          | 0          |
| <b>Corynebacterium stationis</b>    | 1         | 0          | 1          |
| <b>Enterococcus pseudoavium</b>     | 1         | 1          | 0          |
| <b>Staphylococcus epidermidis</b>   | 4         | 10         | 0          |
| <b>Staphylococcus haemolyticus</b>  | 2         | 0          | 2          |
| <b>Staphylococcus saprophyticus</b> | 1         | 0          | 1          |

### Cow 45

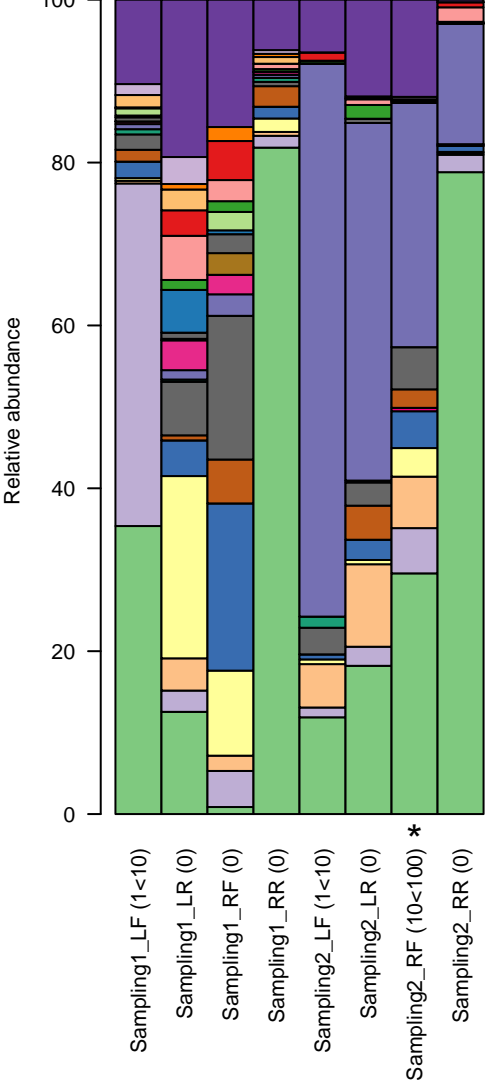

- Other (10 %)
- Family XI\_2II (1 %)
- Planococcaceae (0 %)
- Pseudomonadaceae (1 %)
- Family XI\_2 (1 %)
- Family XI (1 %)
- Family X (1 %)
- Spingomonadaceae (0 %)
- unclassified\_Clostridiales (1 %)
- Blastocatellaceae (0 %)
- Propionibacteriaceae (1 %)
- Beijerinckiaceae (0 %)
- Xanthomonadaceae (0 %)
- Enterococcaceae (0 %)
- Burkholderiaceae (1 %)
- Carnobacteriaceae (20 %)
- Leuconostocaceae (0 %)
- Moraxellaceae (0 %)
- Lachnospiraceae (5 %)
- Micrococcaceae (2 %)
- Streptococcaceae (0 %)
- Peptostreptococcaceae (5 %)
- Ruminococcaceae (5 %)
- Aerococcaceae (4 %)
- Staphylococcaceae (8 %)
- Corynebacteriaceae (34 %)

### Corynebacteriaceae

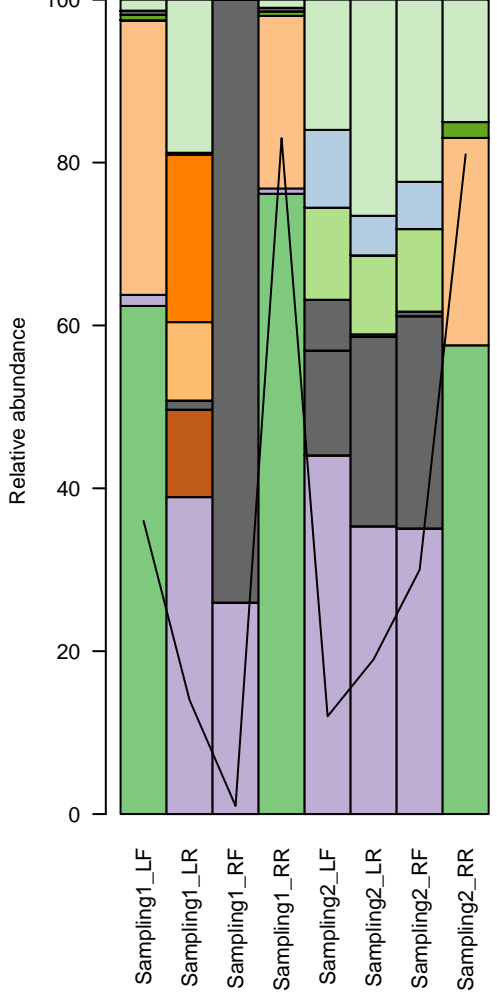

- Other (13 %)
- SV\_225 Cory. pseudotuberculosis/sph (3 %)
- SV\_1253 Cory. bovis (0 %)
- SV\_133 Cory. striatum (0 %)
- SV\_149 Cory. simulans (0 %)
- SV\_210 Cory. nuruki (0 %)
- SV\_166 Cory. confusum (0 %)
- SV\_247 Cory. marinum (3 %)
- SV\_216 Cory. bovis (1 %)
- SV\_91 Cory. simulans (0 %)
- SV\_109 Cory. amycolatum/xerosis/lac (0 %)
- SV\_150 Cory. ulceribovis/sphenisci (0 %)
- SV\_169 Cory. ulceribovis (4 %)
- SV\_113 Cory. crudilactis (0 %)
- SV\_102 Cory. amycolatum/xerosis/lac (0 %)
- SV\_88 Cory. bovis (10 %)
- SV\_68 Cory. faecale (0 %)
- SV\_80 Cory. lubricantis (0 %)
- SV\_75 Cory. sphenisci (0 %)
- SV\_17 Cory. kroppenstedtii (0 %)
- SV\_114 Cory. resistens (0 %)
- SV\_73 Cory. kroppenstedtii (0 %)
- SV\_35 Cory. amycolatum/lactis/xeros (0 %)
- SV\_39 Cory. pseudotuberculosis (8 %)
- SV\_32 Cory. casei (1 %)
- SV\_24 Cory. crudilactis (0 %)
- SV\_34 Cory. simulans (0 %)
- SV\_29 Cory. frankenforstense (0 %)
- SV\_3 Cory. bovis (10 %)
- SV\_8 Cory. xerosis/hansenii/freneyi (23 %)
- SV\_1 Cory. bovis (25 %)

### Somatic cell count

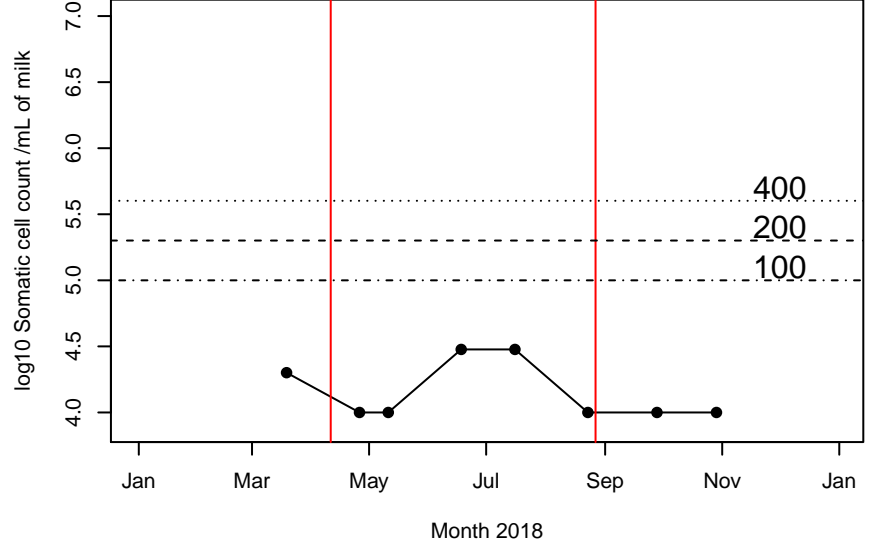

|                                   | # quarter | Sampling 1 | Sampling 2 |
|-----------------------------------|-----------|------------|------------|
| <b>Aerococcus viridans</b>        | 2         | 0          | 5          |
| <b>Staphylococcus chromogenes</b> | 1         | 0          | 1          |
| <b>Staphylococcus epidermidis</b> | 1         | 1          | 0          |

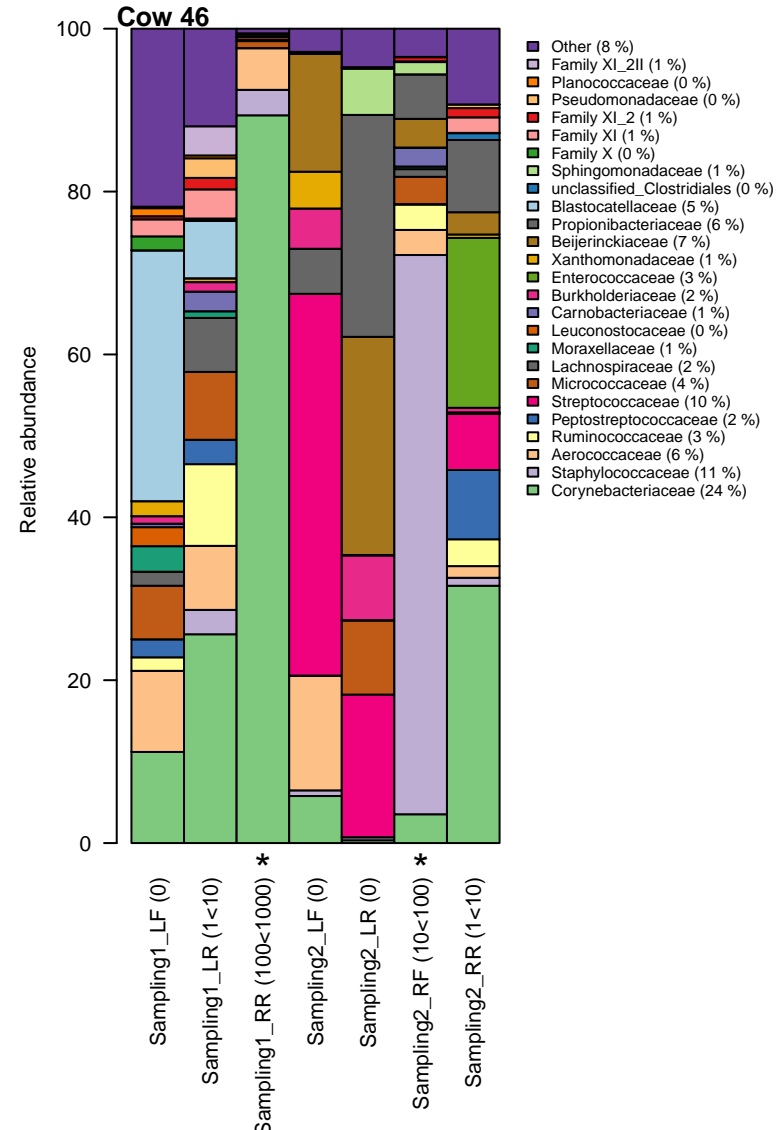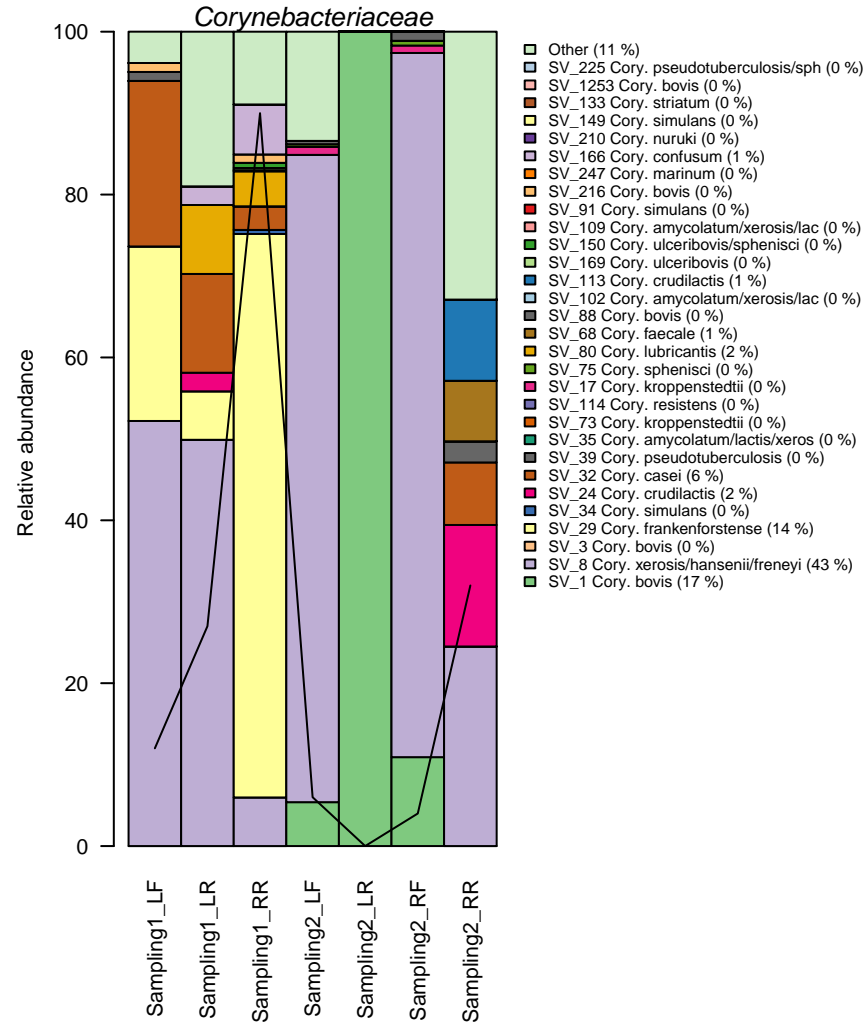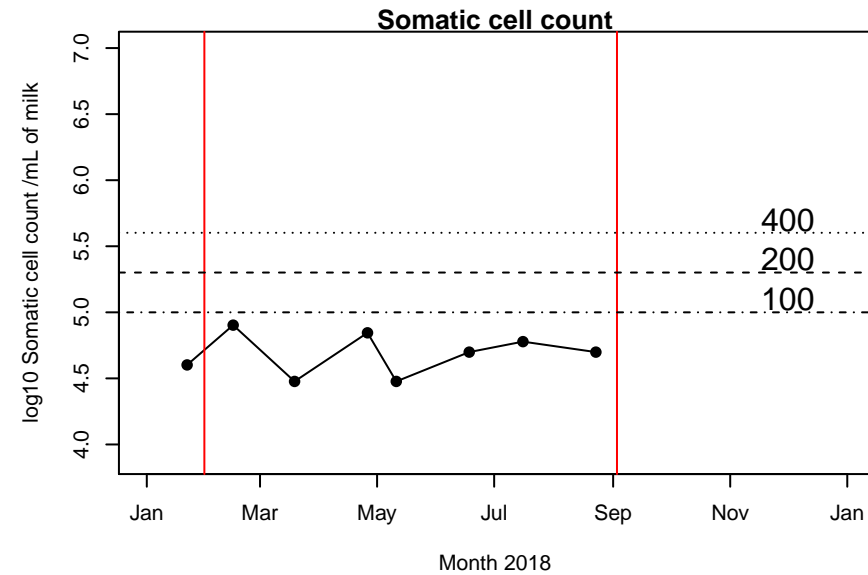

|                                   | # quarter | Sampling 1 | Sampling 2 |
|-----------------------------------|-----------|------------|------------|
| <b>Aerococcus viridans</b>        | 3         | 6          | 0          |
| <b>Corynebacterium confusum</b>   | 1         | 1          | 0          |
| <b>Corynebacterium stationis</b>  | 1         | 1          | 0          |
| <b>Pediococcus pentosaceus</b>    | 2         | 2          | 0          |
| <b>Staphylococcus chromogenes</b> | 3         | 10         | 3          |
| <b>Staphylococcus equorum</b>     | 1         | 1          | 0          |

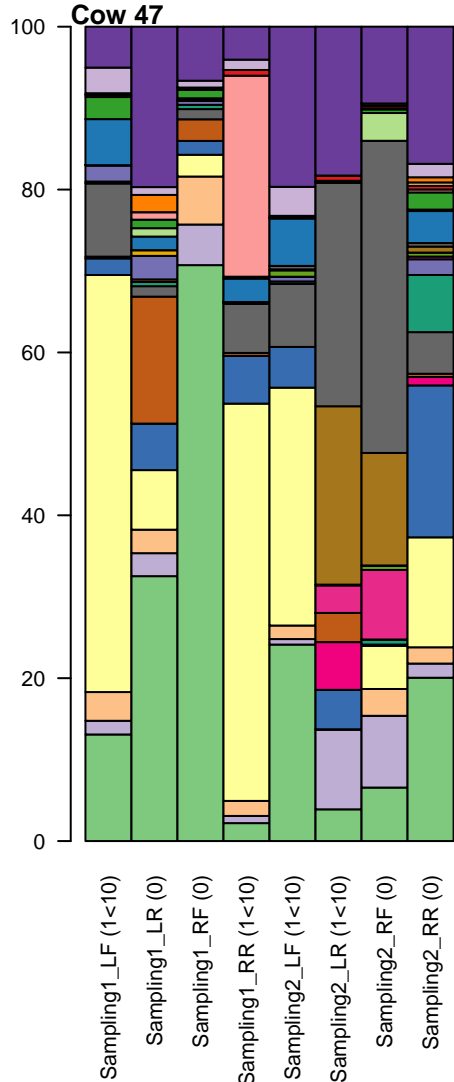

- Other (12 %)
- Family XI\_2II (1 %)
- Planococcaceae (0 %)
- Pseudomonadaceae (0 %)
- Family XI\_2 (0 %)
- Family XI (3 %)
- Family X (1 %)
- Sphingomonadaceae (1 %)
- unclassified\_Clostridiales (3 %)
- Blastocatellaceae (0 %)
- Propionibacteriaceae (8 %)
- Beijerinckiaceae (5 %)
- Xanthomonadaceae (0 %)
- Enterococcaceae (0 %)
- Burkholderiaceae (2 %)
- Carnobacteriaceae (1 %)
- Leuconostocaceae (0 %)
- Moraxellaceae (1 %)
- Lachnospiraceae (4 %)
- Micrococcaceae (3 %)
- Streptococcaceae (1 %)
- Peptostreptococcaceae (5 %)
- Ruminococcaceae (20 %)
- Aerococcaceae (3 %)
- Staphylococcaceae (4 %)
- Corynebacteriaceae (22 %)

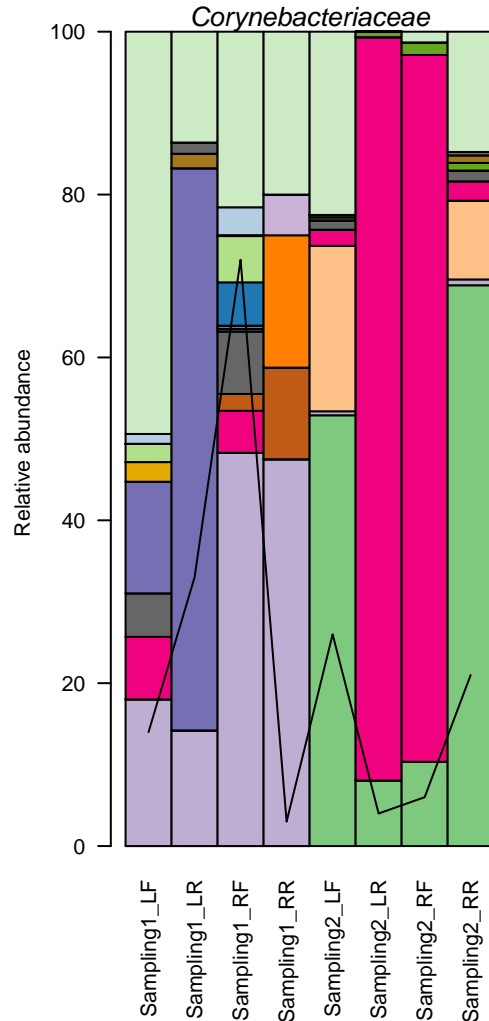

- Other (18 %)
- SV\_225 Cory. pseudotuberculosis/sph (1 %)
- SV\_1253 Cory. bovis (0 %)
- SV\_133 Cory. striatum (0 %)
- SV\_149 Cory. simulans (0 %)
- SV\_210 Cory. nuruki (0 %)
- SV\_166 Cory. confusum (1 %)
- SV\_247 Cory. marinum (2 %)
- SV\_216 Cory. bovis (0 %)
- SV\_91 Cory. simulans (0 %)
- SV\_109 Cory. amycolatum/xerosis/lac (0 %)
- SV\_150 Cory. ulceribovis/sphenisci (0 %)
- SV\_169 Cory. ulceribovis (1 %)
- SV\_113 Cory. crudilactis (1 %)
- SV\_102 Cory. amycolatum/xerosis/lac (0 %)
- SV\_88 Cory. bovis (0 %)
- SV\_68 Cory. faecale (0 %)
- SV\_80 Cory. lubricantis (0 %)
- SV\_75 Cory. sphenisci (0 %)
- SV\_17 Cory. kroppenstedtii (0 %)
- SV\_114 Cory. resistens (10 %)
- SV\_73 Cory. kroppenstedtii (0 %)
- SV\_35 Cory. amycolatum/lactis/xeros (0 %)
- SV\_39 Cory. pseudotuberculosis (2 %)
- SV\_32 Cory. casei (2 %)
- SV\_24 Cory. crudilactis (24 %)
- SV\_34 Cory. simulans (0 %)
- SV\_29 Cory. frankenforstense (0 %)
- SV\_3 Cory. bovis (4 %)
- SV\_8 Cory. xerosis/hanseniifreneyi (16 %)
- SV\_1 Cory. bovis (18 %)

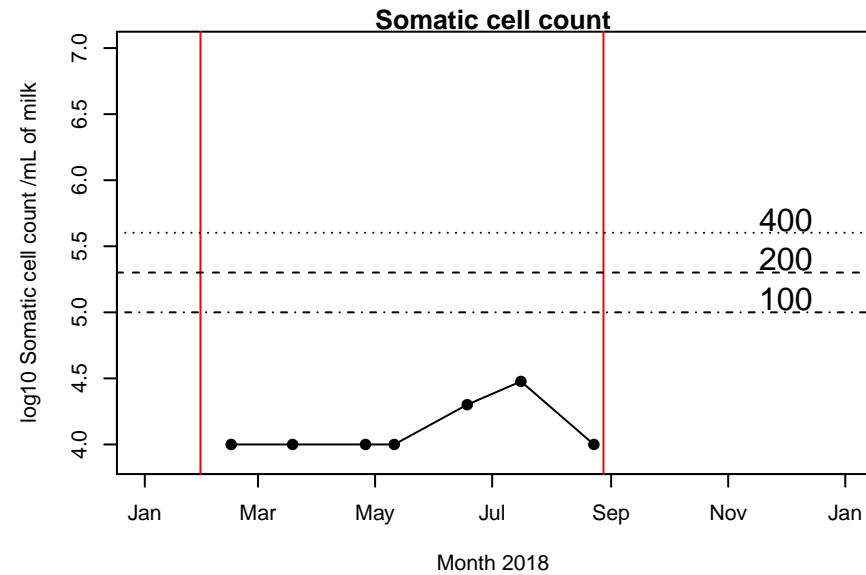

|                                    | # quarter | Sampling 1 | Sampling 2 |
|------------------------------------|-----------|------------|------------|
| <b>Aerococcus viridans</b>         | 1         | 0          | 1          |
| <b>Staphylococcus haemolyticus</b> | 1         | 1          | 0          |

### Cow 50

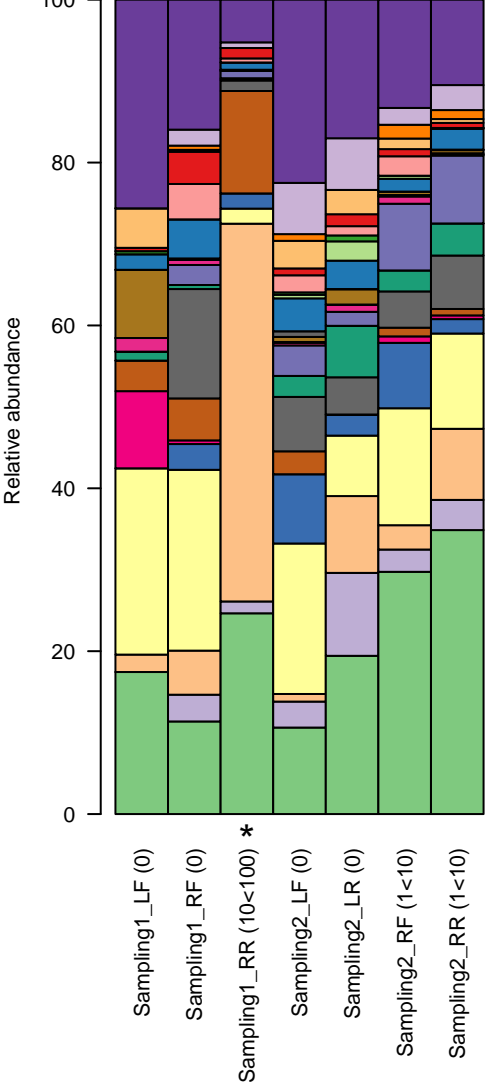

- Other (16 %)
- Family XI\_2II (3 %)
- Planococcaceae (1 %)
- Pseudomonadaceae (2 %)
- Family XI\_2 (1 %)
- Family XI (1 %)
- Family X (0 %)
- Sphingomonadaceae (0 %)
- unclassified\_Clostridiales (3 %)
- Blastocatellaceae (0 %)
- Propionibacteriaceae (0 %)
- Beijerinckiaceae (2 %)
- Xanthomonadaceae (0 %)
- Enterococcaceae (0 %)
- Burkholderiaceae (1 %)
- Carnobacteriaceae (4 %)
- Leuconostocaceae (0 %)
- Moraxellaceae (2 %)
- Lachnospiraceae (5 %)
- Micrococcaceae (4 %)
- Streptococcaceae (2 %)
- Peptostreptococcaceae (4 %)
- Ruminococcaceae (14 %)
- Aerococcaceae (11 %)
- Staphylococcaceae (4 %)
- Corynebacteriaceae (21 %)

### Corynebacteriaceae

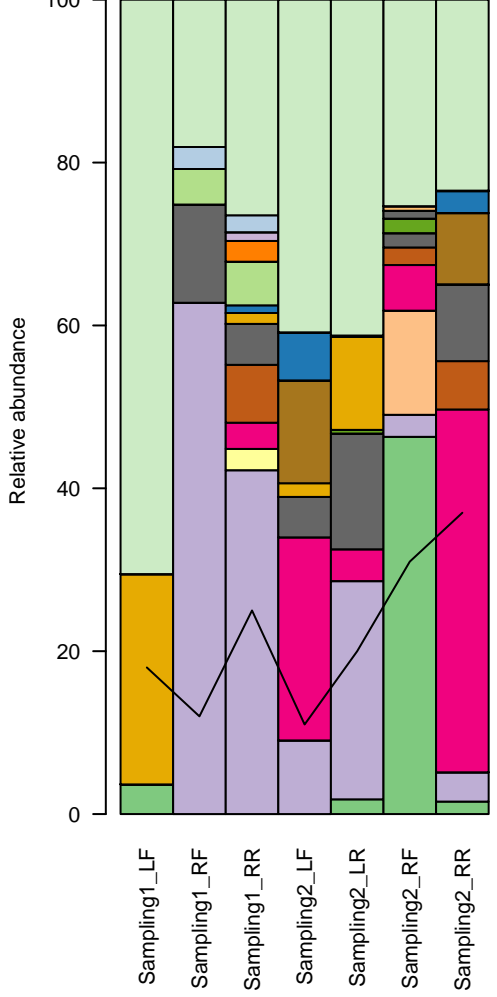

- Other (35 %)
- SV\_225 Cory. pseudotuberculosis/sph (1 %)
- SV\_1253 Cory. bovis (0 %)
- SV\_133 Cory. striatum (0 %)
- SV\_149 Cory. simulans (0 %)
- SV\_210 Cory. nuruki (0 %)
- SV\_166 Cory. confusum (0 %)
- SV\_247 Cory. marinum (0 %)
- SV\_216 Cory. bovis (0 %)
- SV\_91 Cory. simulans (0 %)
- SV\_109 Cory. amycolatum/xerosis/lac (0 %)
- SV\_150 Cory. ulceribovis/sphenisci (0 %)
- SV\_169 Cory. ulceribovis (1 %)
- SV\_113 Cory. crudilactis (1 %)
- SV\_102 Cory. amycolatum/xerosis/lac (0 %)
- SV\_88 Cory. bovis (0 %)
- SV\_68 Cory. faecale (3 %)
- SV\_80 Cory. lubricantis (6 %)
- SV\_75 Cory. sphenisci (0 %)
- SV\_17 Cory. kroppenstedtii (0 %)
- SV\_114 Cory. resistens (0 %)
- SV\_73 Cory. kroppenstedtii (0 %)
- SV\_35 Cory. amycolatum/lactis/xeros (0 %)
- SV\_39 Cory. pseudotuberculosis (7 %)
- SV\_32 Cory. casei (2 %)
- SV\_24 Cory. crudilactis (12 %)
- SV\_34 Cory. simulans (0 %)
- SV\_29 Cory. frankenforstense (0 %)
- SV\_3 Cory. bovis (2 %)
- SV\_8 Cory. xerosis/hansenii/freneyi (21 %)
- SV\_1 Cory. bovis (8 %)

### Somatic cell count

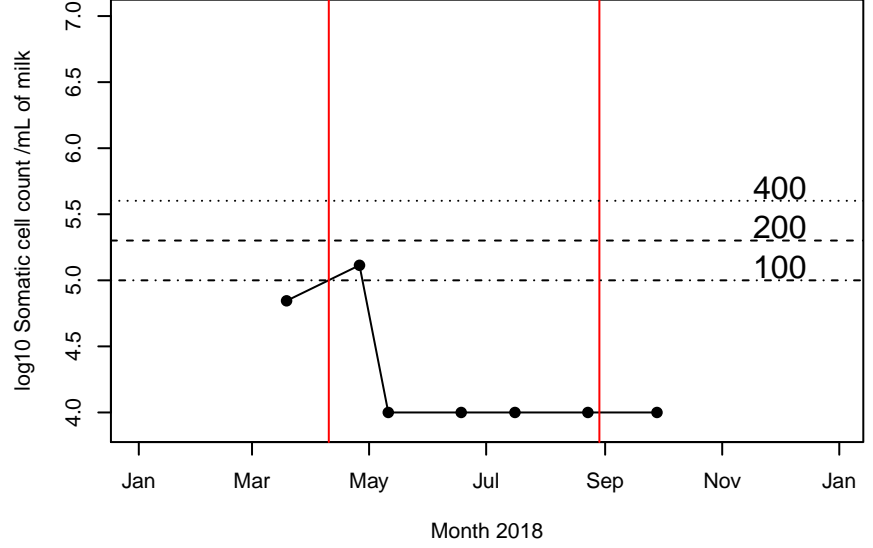

|                                    | # quarter | Sampling 1 | Sampling 2 |
|------------------------------------|-----------|------------|------------|
| <b>Acinetobacter towneri</b>       | 1         | 0          | 1          |
| <b>Aerococcus viridans</b>         | 3         | 8          | 1          |
| <b>Pediococcus pentosaceus</b>     | 1         | 1          | 0          |
| <b>Staphylococcus auricularis</b>  | 1         | 1          | 0          |
| <b>Staphylococcus haemolyticus</b> | 2         | 1          | 1          |

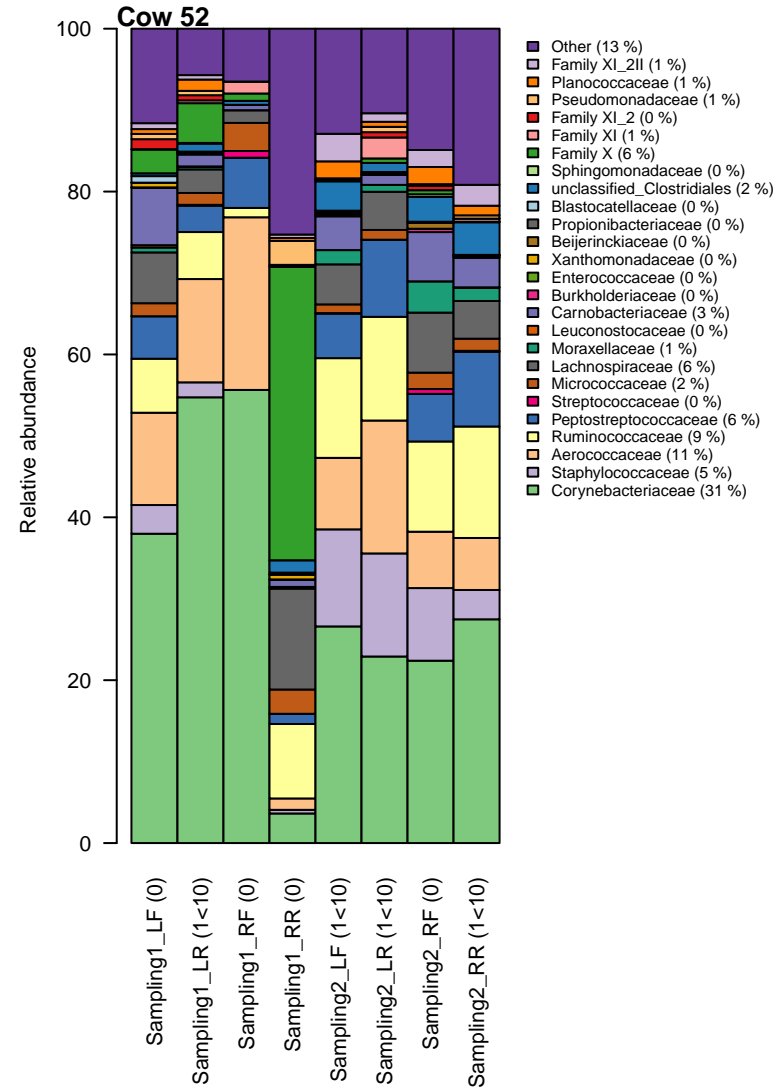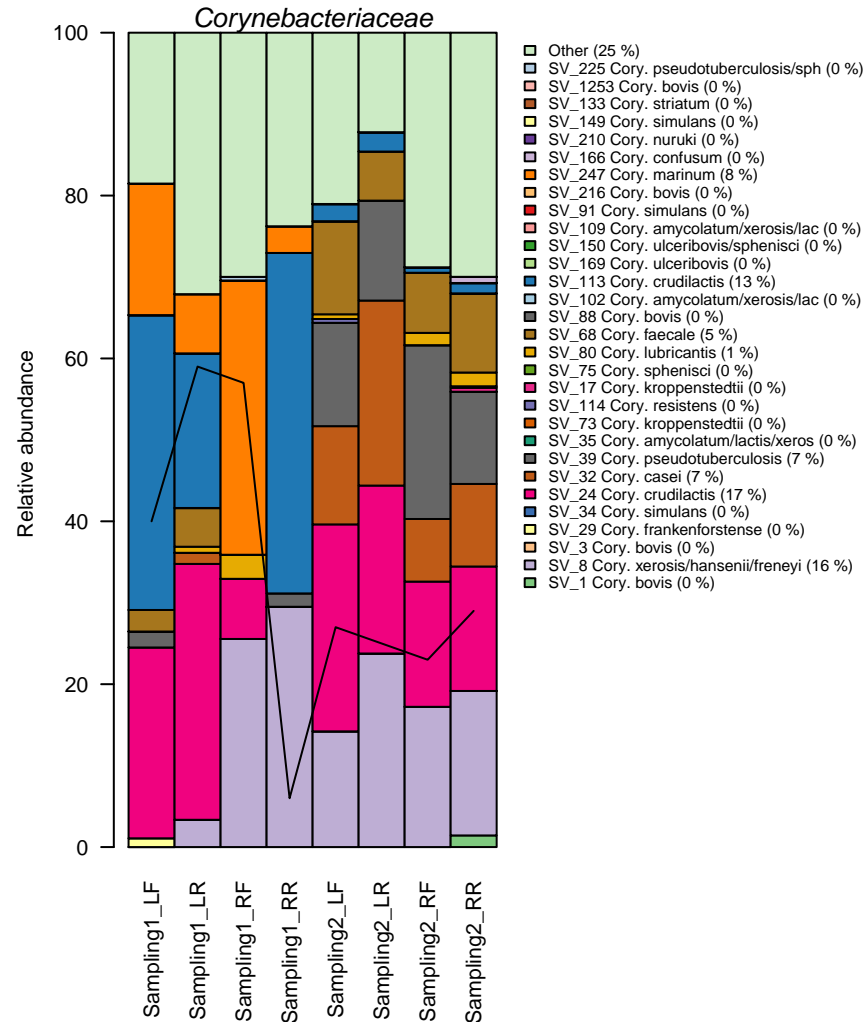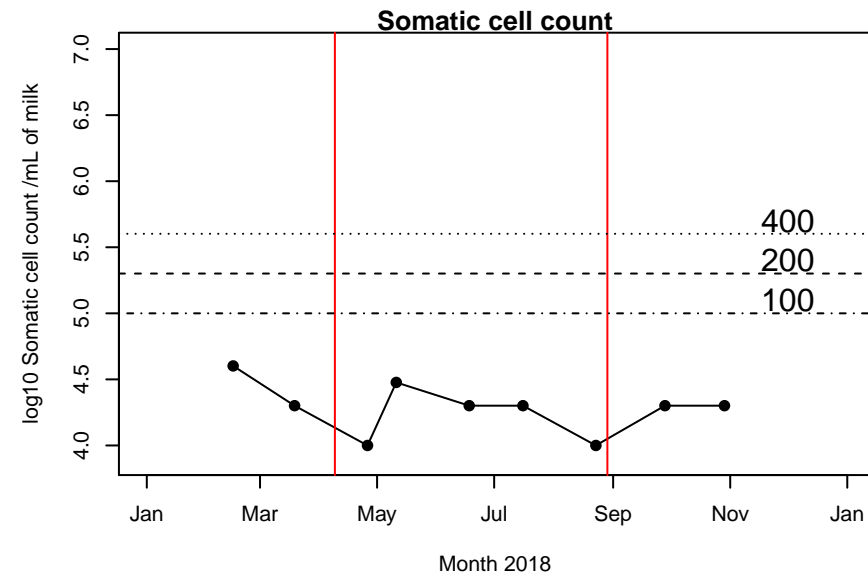

|                                    | # quarter | Sampling 1 | Sampling 2 |
|------------------------------------|-----------|------------|------------|
| <b>Lysinibacillus sphaericus</b>   | 1         | 1          | 0          |
| <b>Staphylococcus chromogenes</b>  | 1         | 0          | 1          |
| <b>Staphylococcus capitis</b>      | 1         | 0          | 1          |
| <b>Staphylococcus chromogenes</b>  | 1         | 0          | 1          |
| <b>Staphylococcus haemolyticus</b> | 1         | 0          | 1          |

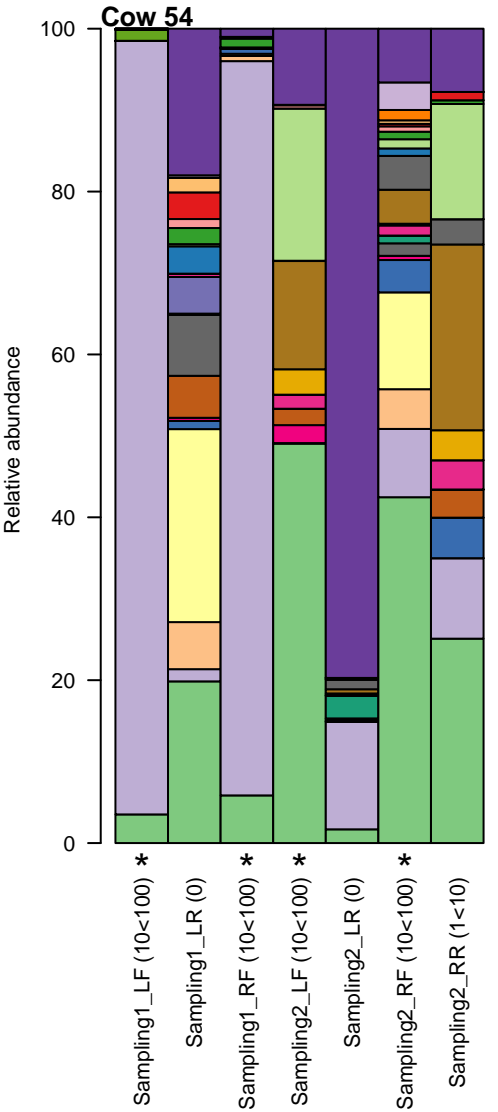

- Other (17 %)
- Family XI\_2II (1 %)
- Planococcaceae (0 %)
- Pseudomonadaceae (0 %)
- Family XI\_2 (1 %)
- Family XI (0 %)
- Family X (1 %)
- Sphingomonadaceae (5 %)
- unclassified\_Clostridiales (1 %)
- Blastocatellaceae (0 %)
- Propionibacteriaceae (1 %)
- Beijerinckiaceae (6 %)
- Xanthomonadaceae (1 %)
- Enterococcaceae (0 %)
- Burkholderiaceae (1 %)
- Carnobacteriaceae (1 %)
- Leuconostocaceae (0 %)
- Moraxellaceae (1 %)
- Lachnospiraceae (1 %)
- Micrococcaceae (2 %)
- Streptococcaceae (0 %)
- Peptostreptococcaceae (2 %)
- Ruminococcaceae (5 %)
- Aerococcaceae (2 %)
- Staphylococcaceae (31 %)
- Corynebacteriaceae (21 %)

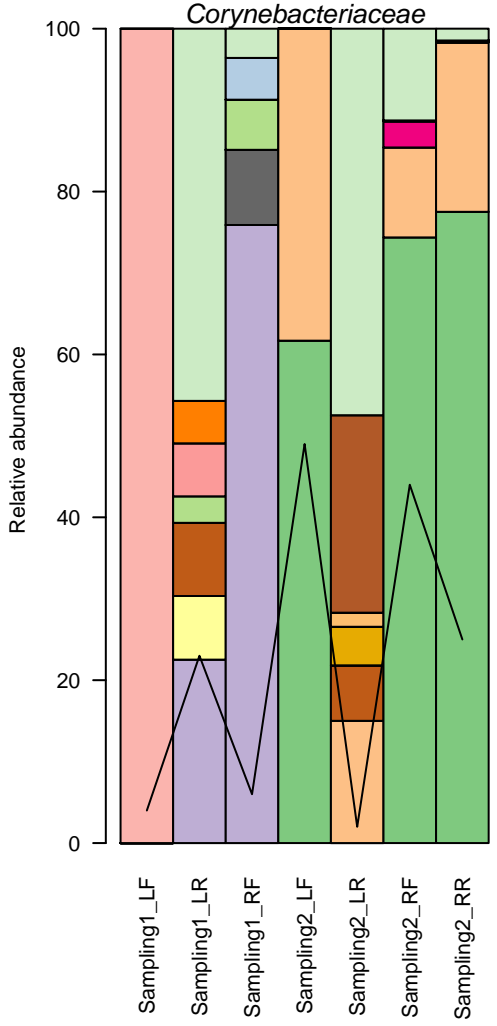

- Other (16 %)
- SV\_225 Cory. pseudotuberculosis/sph (1 %)
- SV\_1253 Cory. bovis (14 %)
- SV\_133 Cory. striatum (3 %)
- SV\_149 Cory. simulans (0 %)
- SV\_210 Cory. nuruki (0 %)
- SV\_166 Cory. confusum (0 %)
- SV\_247 Cory. marinum (1 %)
- SV\_216 Cory. bovis (0 %)
- SV\_91 Cory. simulans (0 %)
- SV\_109 Cory. amycolatum/xerosis/lac (1 %)
- SV\_150 Cory. ulceribovis/sphenisci (0 %)
- SV\_169 Cory. ulceribovis (1 %)
- SV\_113 Cory. crudilactis (0 %)
- SV\_102 Cory. amycolatum/xerosis/lac (0 %)
- SV\_88 Cory. bovis (0 %)
- SV\_68 Cory. faecale (0 %)
- SV\_80 Cory. lubricantis (1 %)
- SV\_75 Cory. sphenisci (0 %)
- SV\_17 Cory. kroppenstedtii (0 %)
- SV\_114 Cory. resistens (0 %)
- SV\_73 Cory. kroppenstedtii (0 %)
- SV\_35 Cory. amycolatum/lactis/xeros (0 %)
- SV\_39 Cory. pseudotuberculosis (1 %)
- SV\_32 Cory. casei (2 %)
- SV\_24 Cory. crudilactis (0 %)
- SV\_34 Cory. simulans (0 %)
- SV\_29 Cory. frankenforstense (1 %)
- SV\_3 Cory. bovis (12 %)
- SV\_8 Cory. xerosis/hansenii/freneyi (14 %)
- SV\_1 Cory. bovis (31 %)

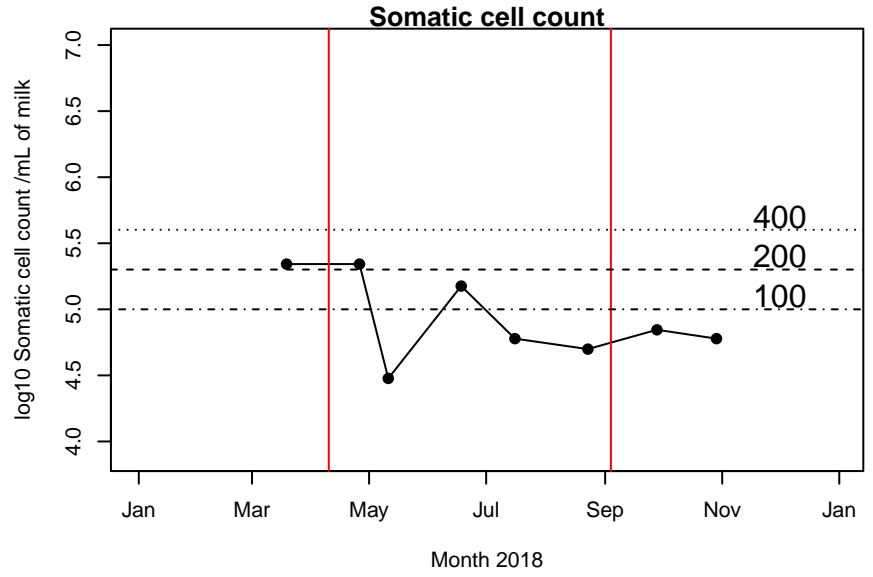

|                                   | # quarter | Sampling 1 | Sampling 2 |
|-----------------------------------|-----------|------------|------------|
| <b>Aerococcus viridans</b>        | 1         | 1          | 0          |
| <b>Corynebacterium bovis</b>      | 3         | 0          | 3          |
| <b>Staphylococcus chromogenes</b> | 3         | 15         | 0          |
| <b>Staphylococcus epidermidis</b> | 1         | 0          | 1          |
| <b>Streptococcus canis</b>        | 1         | 1          | 0          |
| <b>Streptococcus dysgalactiae</b> | 1         | 2          | 0          |



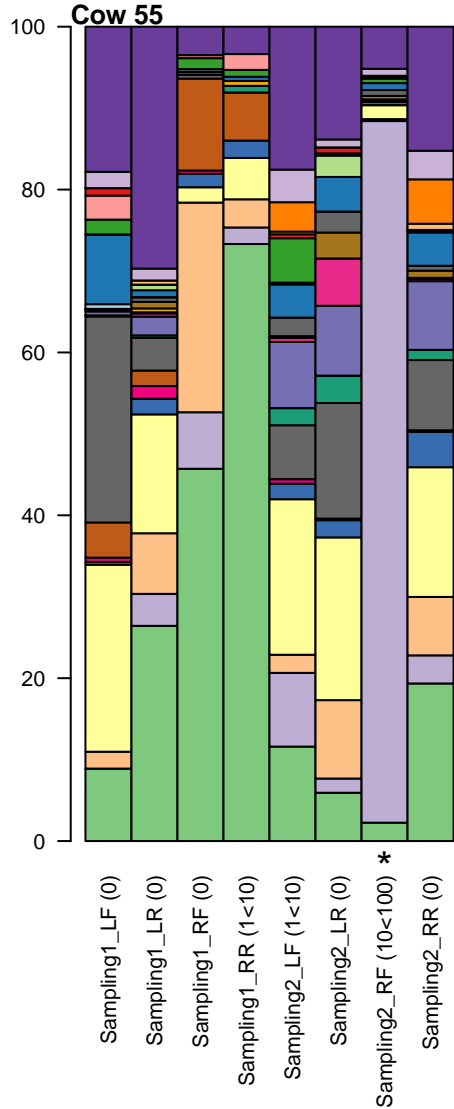

- Other (13 %)
- Family XI\_2II (2 %)
- Planococcaceae (1 %)
- Pseudomonadaceae (0 %)
- Family XI\_2 (0 %)
- Family XI (1 %)
- Family X (1 %)
- Sphingomonadaceae (0 %)
- unclassified\_Clostridiales (3 %)
- Blastocatellaceae (0 %)
- Propionibacteriaceae (1 %)
- Beijerinckiaceae (1 %)
- Xanthomonadaceae (0 %)
- Enterococcaceae (0 %)
- Burkholderiaceae (1 %)
- Carnobacteriaceae (3 %)
- Leuconostocaceae (0 %)
- Moraxellaceae (1 %)
- Lachnospiraceae (7 %)
- Micrococcaceae (3 %)
- Streptococcaceae (0 %)
- Peptostreptococcaceae (2 %)
- Ruminococcaceae (13 %)
- Aerococcaceae (7 %)
- Staphylococcaceae (14 %)
- Corynebacteriaceae (24 %)

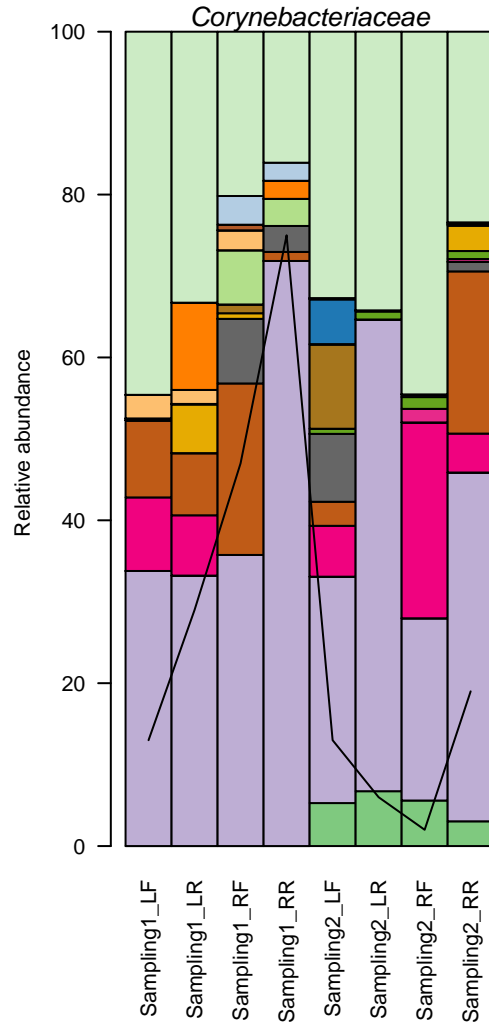

- Other (31 %)
- SV\_225 Cory. pseudotuberculosis/sph (1 %)
- SV\_1253 Cory. bovis (0 %)
- SV\_133 Cory. striatum (0 %)
- SV\_149 Cory. simulans (0 %)
- SV\_210 Cory. nuruki (0 %)
- SV\_166 Cory. confusum (0 %)
- SV\_247 Cory. marinum (2 %)
- SV\_216 Cory. bovis (1 %)
- SV\_91 Cory. simulans (0 %)
- SV\_109 Cory. amycolatum/xerosis/lac (0 %)
- SV\_150 Cory. ulceribovis/sphenisci (0 %)
- SV\_169 Cory. ulceribovis (1 %)
- SV\_113 Cory. crudilactis (1 %)
- SV\_102 Cory. amycolatum/xerosis/lac (0 %)
- SV\_88 Cory. bovis (0 %)
- SV\_68 Cory. faecale (1 %)
- SV\_80 Cory. lubricantis (1 %)
- SV\_75 Cory. sphenisci (1 %)
- SV\_17 Cory. kroppenstedtii (0 %)
- SV\_114 Cory. resistens (0 %)
- SV\_73 Cory. kroppenstedtii (0 %)
- SV\_35 Cory. amycolatum/lactis/xeros (0 %)
- SV\_39 Cory. pseudotuberculosis (3 %)
- SV\_32 Cory. casei (8 %)
- SV\_24 Cory. crudilactis (6 %)
- SV\_34 Cory. simulans (0 %)
- SV\_29 Cory. frankenforstense (0 %)
- SV\_3 Cory. bovis (0 %)
- SV\_8 Cory. xerosis/hansenii/freneyi (41 %)
- SV\_1 Cory. bovis (3 %)

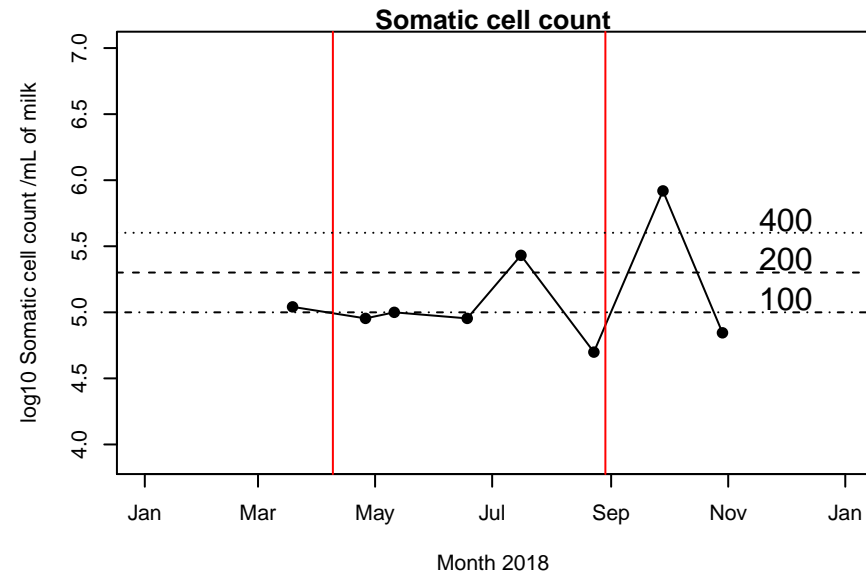

Staphylococcus chromogenes # quarter 3 Sampling 1 7 Sampling 2 4

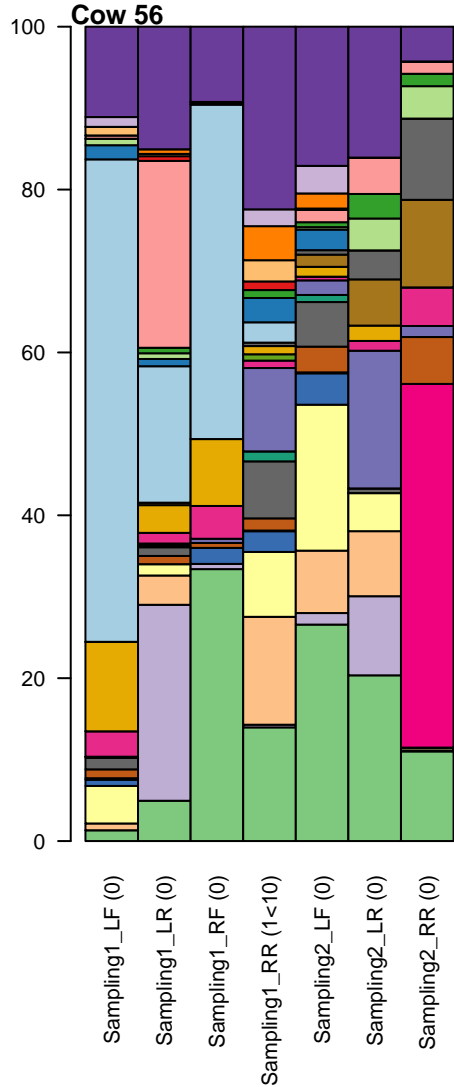

- Other (14 %)
- Family XI\_2II (1 %)
- Planococcaceae (1 %)
- Pseudomonadaceae (1 %)
- Family XI\_2 (0 %)
- Family XI (4 %)
- Family X (1 %)
- Sphingomonadaceae (1 %)
- unclassified\_Clostridiales (1 %)
- Blastocatellaceae (17 %)
- Propionibacteriaceae (2 %)
- Beijerinckiaceae (3 %)
- Xanthomonadaceae (4 %)
- Enterococcaceae (0 %)
- Burkholderiaceae (2 %)
- Carnobacteriaceae (4 %)
- Leuconostocaceae (0 %)
- Moraxellaceae (0 %)
- Lachnospiraceae (2 %)
- Micrococcaceae (2 %)
- Streptococcaceae (6 %)
- Peptostreptococcaceae (1 %)
- Ruminococcaceae (5 %)
- Aerococcaceae (5 %)
- Staphylococcaceae (5 %)
- Corynebacteriaceae (16 %)

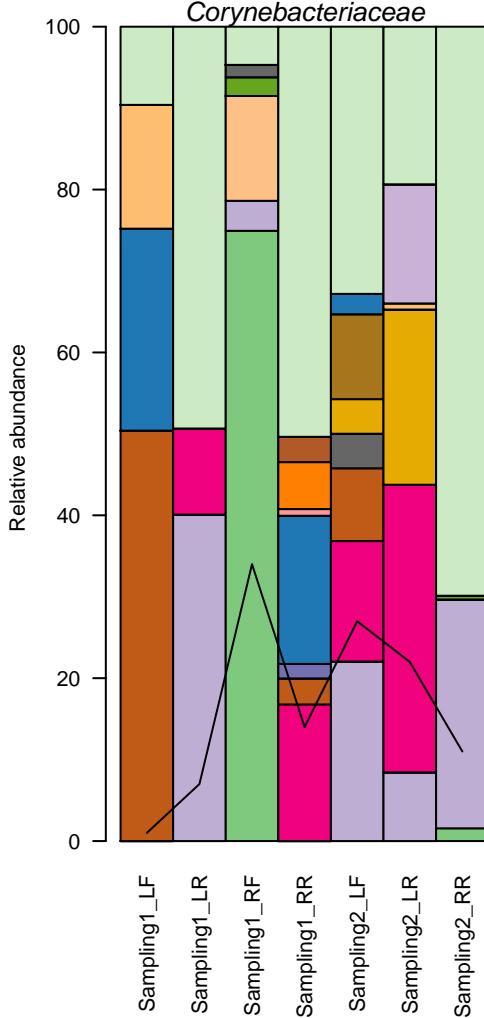

- Other (34 %)
- SV\_225 Cory. pseudotuberculosis/sph (0 %)
- SV\_1253 Cory. bovis (0 %)
- SV\_133 Cory. striatum (0 %)
- SV\_149 Cory. simulans (0 %)
- SV\_210 Cory. nuruki (0 %)
- SV\_166 Cory. confusum (2 %)
- SV\_247 Cory. marinum (1 %)
- SV\_216 Cory. bovis (2 %)
- SV\_91 Cory. simulans (0 %)
- SV\_109 Cory. amycolatum/xerosis/lac (0 %)
- SV\_150 Cory. ulceribovis/sphenisci (0 %)
- SV\_169 Cory. ulceribovis (0 %)
- SV\_113 Cory. crudilactis (6 %)
- SV\_102 Cory. amycolatum/xerosis/lac (0 %)
- SV\_88 Cory. bovis (0 %)
- SV\_68 Cory. faecale (1 %)
- SV\_80 Cory. lubricantis (4 %)
- SV\_75 Cory. sphenisci (0 %)
- SV\_17 Cory. kroppenstedtii (0 %)
- SV\_114 Cory. resistens (0 %)
- SV\_73 Cory. kroppenstedtii (0 %)
- SV\_35 Cory. amycolatum/lactis/xeros (0 %)
- SV\_39 Cory. pseudotuberculosis (1 %)
- SV\_32 Cory. casei (9 %)
- SV\_24 Cory. crudilactis (11 %)
- SV\_34 Cory. simulans (0 %)
- SV\_29 Cory. frankenforstense (0 %)
- SV\_3 Cory. bovis (2 %)
- SV\_8 Cory. xerosis/hansenii/freneyi (15 %)
- SV\_1 Cory. bovis (11 %)

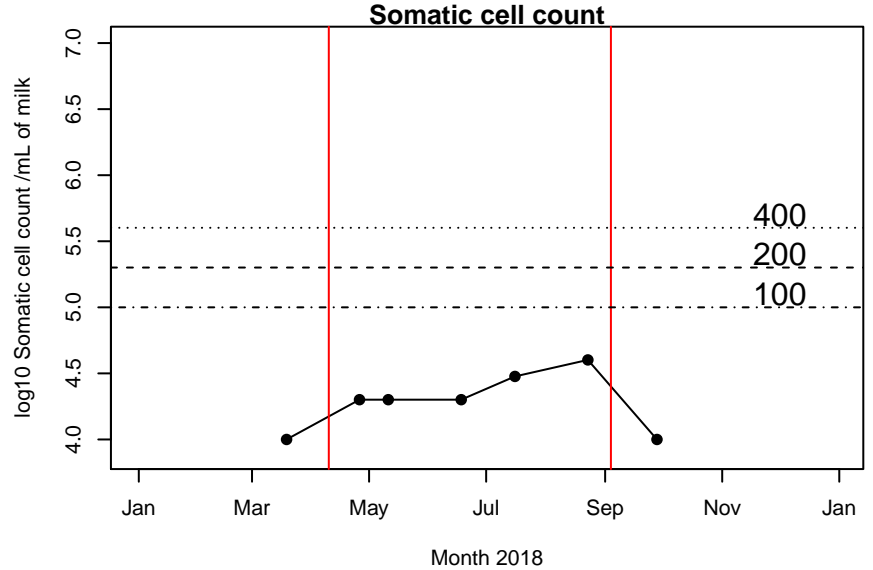

|                                | # quarter | Sampling 1 |
|--------------------------------|-----------|------------|
| <b>Aerococcus viridans</b>     | 1         | 1          |
| <b>Corynebacterium xerosis</b> | 1         | 1          |

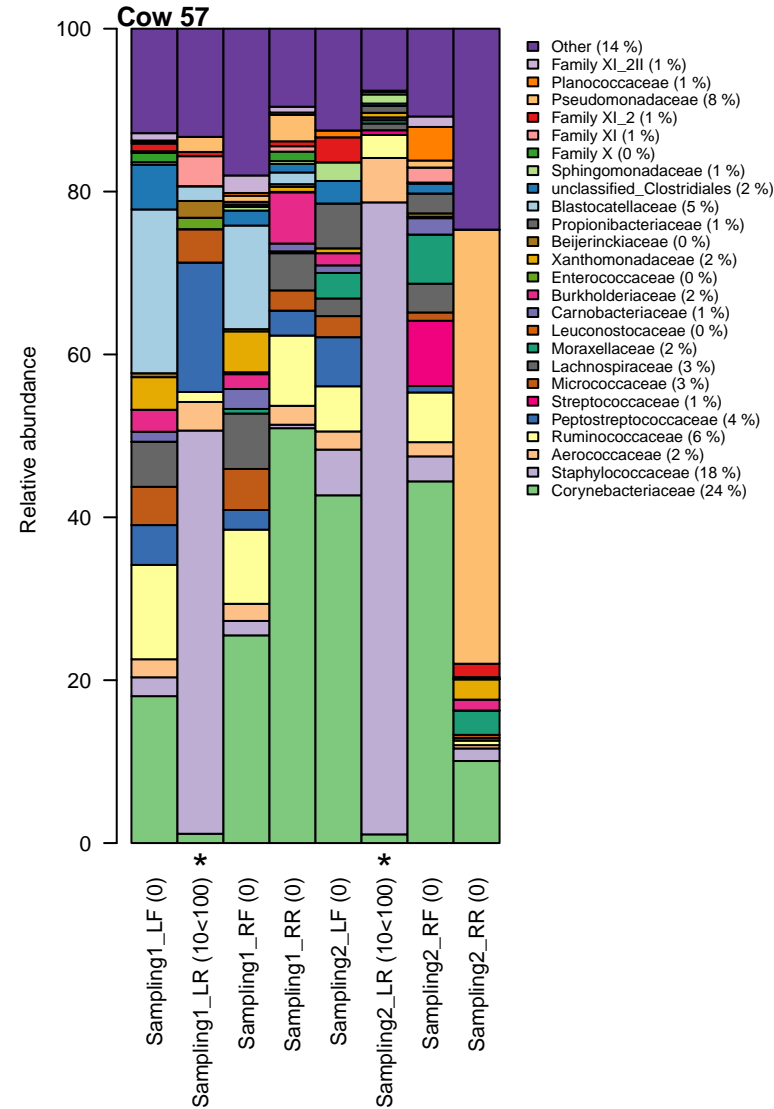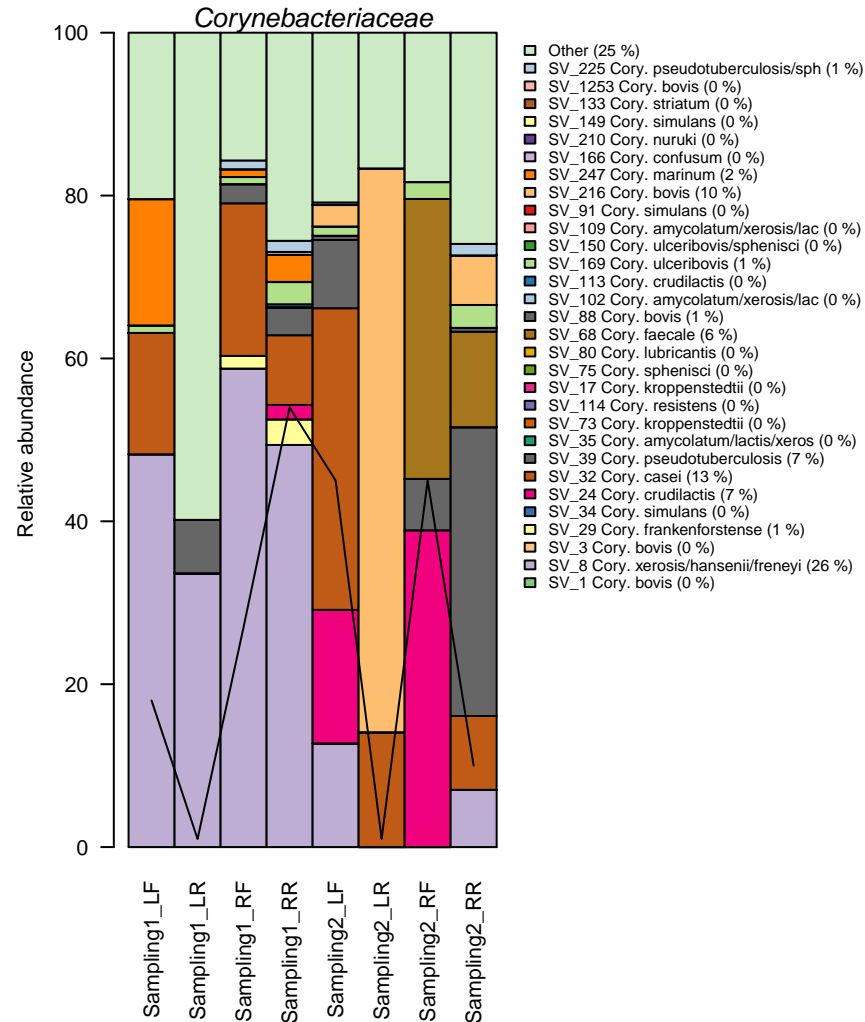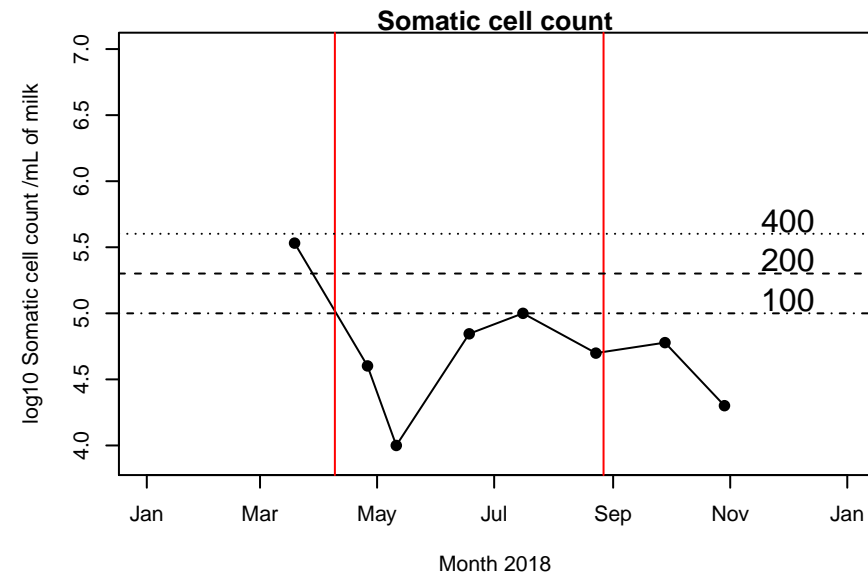

|                                   | # quarter | Sampling 1 | Sampling 2 |
|-----------------------------------|-----------|------------|------------|
| <b>Aerococcus viridans</b>        | 1         | 1          | 0          |
| <b>Corynebacterium amycolatum</b> | 1         | 1          | 0          |
| <b>Staphylococcus chromogenes</b> | 2         | 4          | 4          |

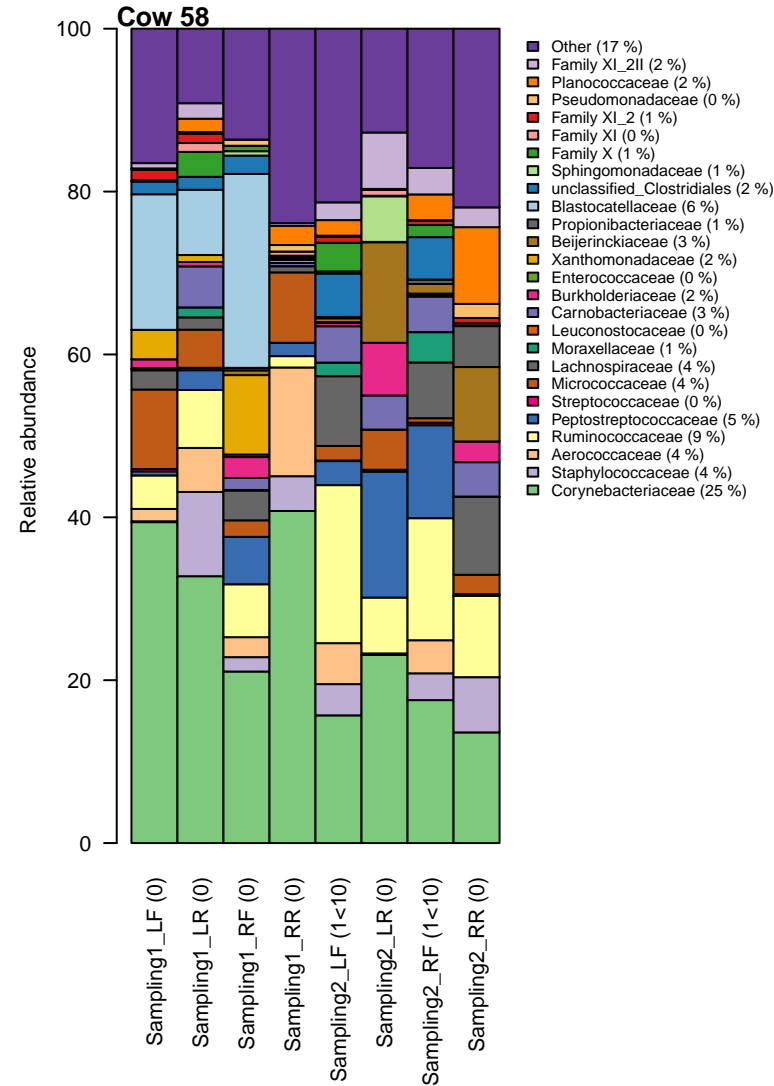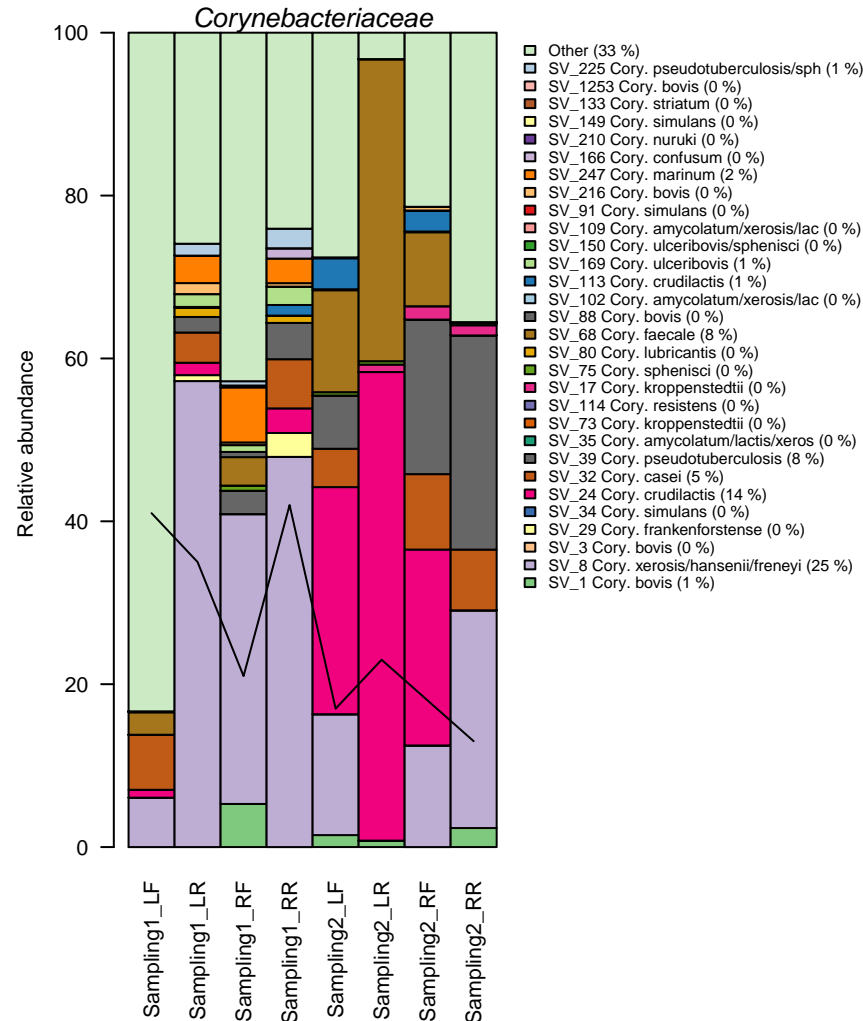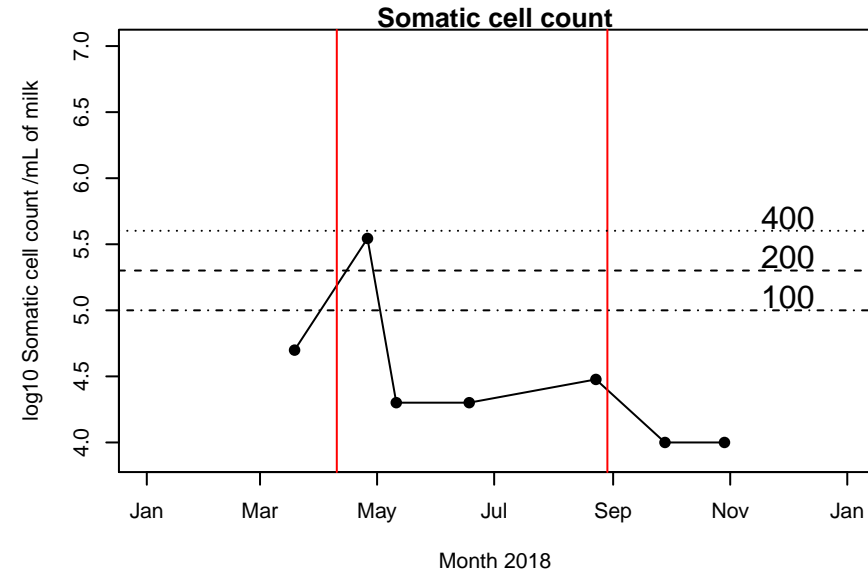

|                                    | # quarter | Sampling 2 |
|------------------------------------|-----------|------------|
| <b>Aerococcus viridans</b>         | 3         | 3          |
| <b>Staphylococcus haemolyticus</b> | 1         | 1          |
| <b>Staphylococcus warneri</b>      | 1         | 1          |

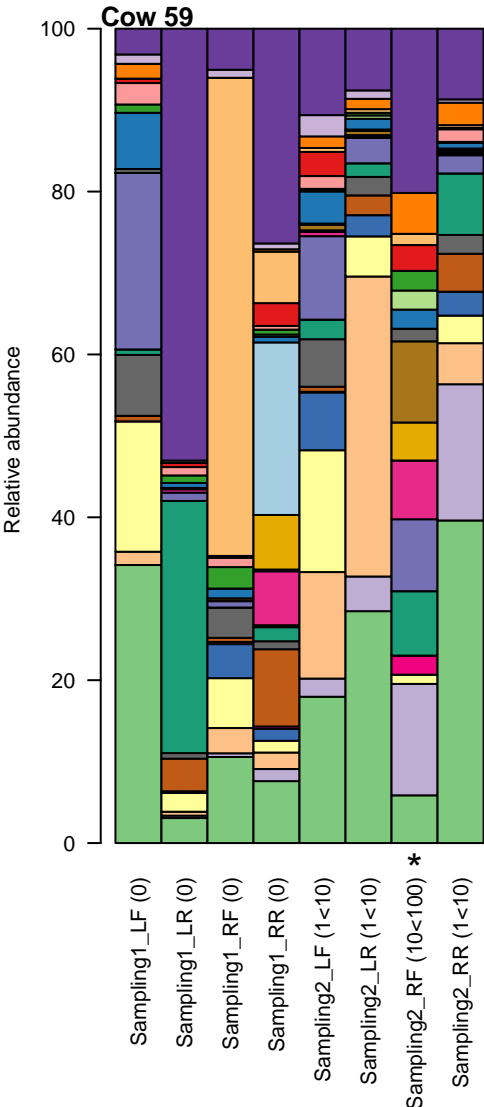

- Other (17 %)
- Family XI\_2II (1 %)
- Planococcaceae (2 %)
- Pseudomonadaceae (8 %)
- Family XI\_2 (1 %)
- Family XI (1 %)
- Family X (1 %)
- Sphingomonadaceae (0 %)
- unclassified\_Clostridiales (2 %)
- Blastocatellaceae (3 %)
- Propionibacteriaceae (0 %)
- Beijerinckiaceae (1 %)
- Xanthomonadaceae (1 %)
- Enterococcaceae (0 %)
- Burkholderiaceae (2 %)
- Carnobacteriaceae (6 %)
- Leuconostocaceae (0 %)
- Moraxellaceae (7 %)
- Lachnospiraceae (3 %)
- Micrococcaceae (3 %)
- Streptococcaceae (0 %)
- Peptostreptococcaceae (2 %)
- Ruminococcaceae (6 %)
- Aerococcaceae (8 %)
- Staphylococcaceae (5 %)
- Corynebacteriaceae (18 %)

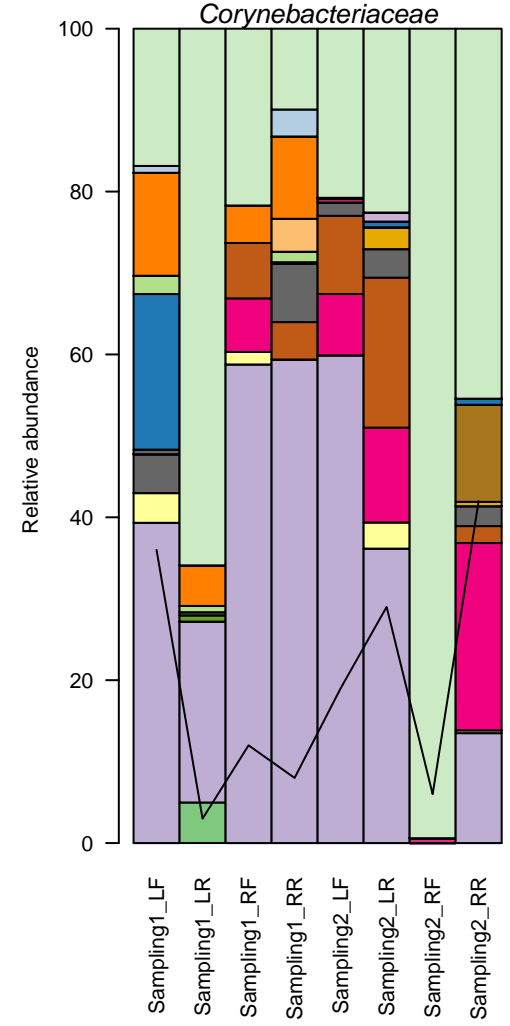

- Other (38 %)
- SV\_225 Cory. pseudotuberculosis/sph (1 %)
- SV\_1253 Cory. bovis (0 %)
- SV\_133 Cory. striatum (0 %)
- SV\_149 Cory. simulans (0 %)
- SV\_210 Cory. nuruki (0 %)
- SV\_166 Cory. confusum (0 %)
- SV\_247 Cory. marinum (4 %)
- SV\_216 Cory. bovis (1 %)
- SV\_91 Cory. simulans (0 %)
- SV\_109 Cory. amycolatum/xerosis/lac (0 %)
- SV\_150 Cory. ulceribovis/sphenisci (0 %)
- SV\_169 Cory. ulceribovis (1 %)
- SV\_113 Cory. crudilactis (3 %)
- SV\_102 Cory. amycolatum/xerosis/lac (0 %)
- SV\_88 Cory. bovis (0 %)
- SV\_68 Cory. faecale (1 %)
- SV\_80 Cory. lubricantis (0 %)
- SV\_75 Cory. sphenisci (0 %)
- SV\_17 Cory. kroppenstedtii (0 %)
- SV\_114 Cory. resistens (0 %)
- SV\_73 Cory. kroppenstedtii (0 %)
- SV\_35 Cory. amycolatum/lactis/xeros (0 %)
- SV\_39 Cory. pseudotuberculosis (2 %)
- SV\_32 Cory. casei (5 %)
- SV\_24 Cory. crudilactis (6 %)
- SV\_34 Cory. simulans (0 %)
- SV\_29 Cory. frankenforstense (1 %)
- SV\_3 Cory. bovis (0 %)
- SV\_8 Cory. xerosis/hansenii/freneyi (36 %)
- SV\_1 Cory. bovis (1 %)

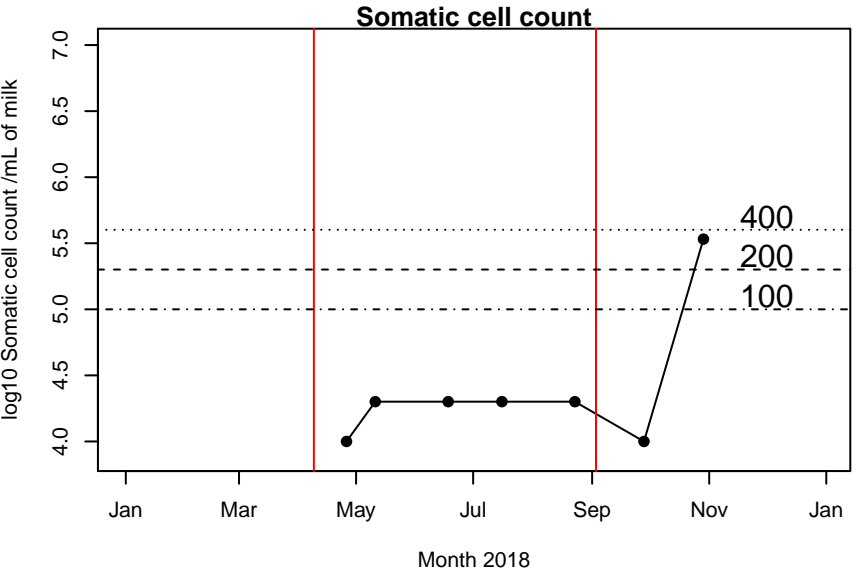

|                                 | # quarter | Sampling 2 |
|---------------------------------|-----------|------------|
| <b>Aerococcus viridans</b>      | 2         | 3          |
| <b>Corynebacterium confusum</b> | 1         | 1          |
| <b>Staphylococcus capitis</b>   | 1         | 1          |

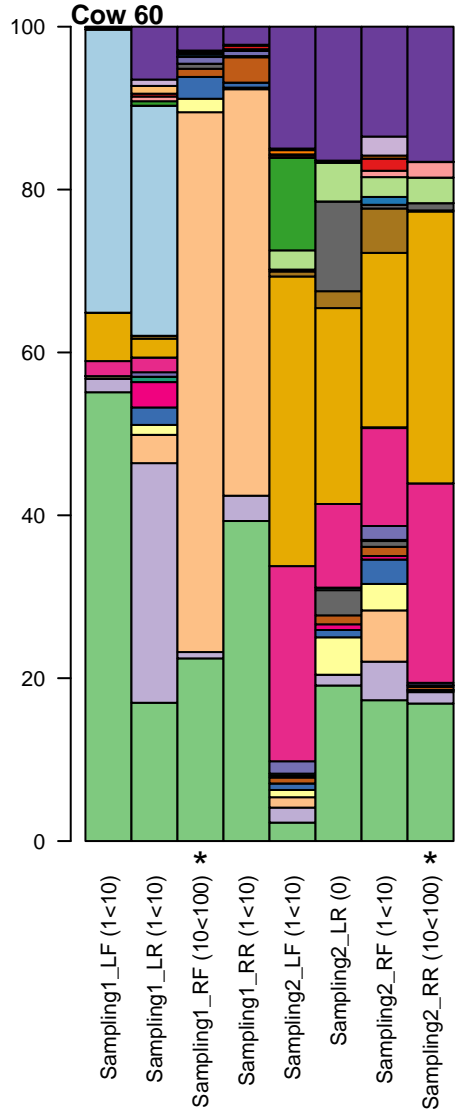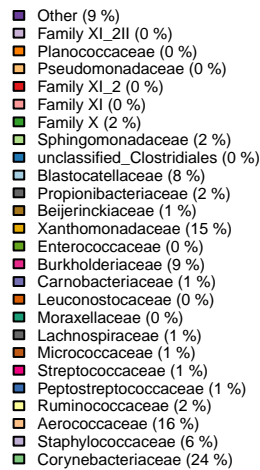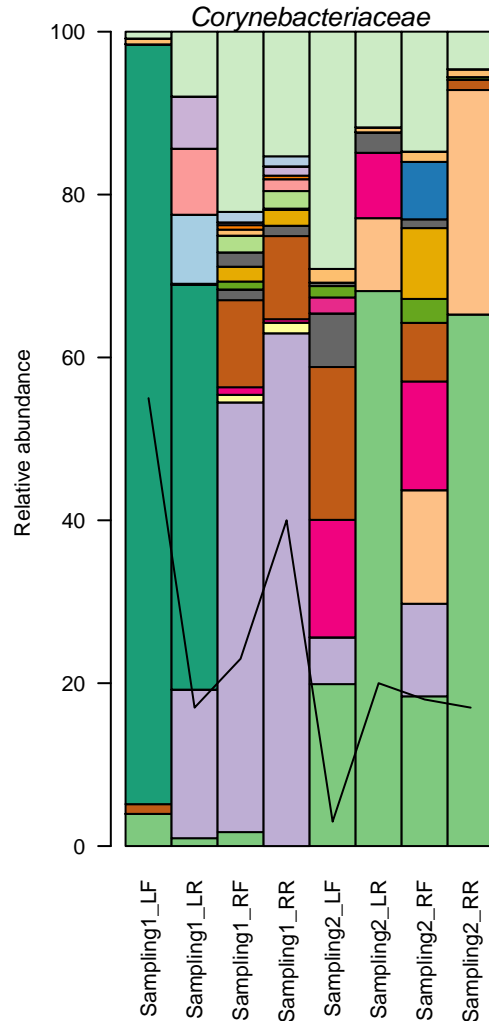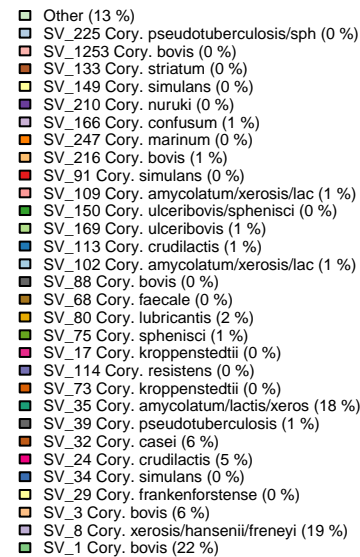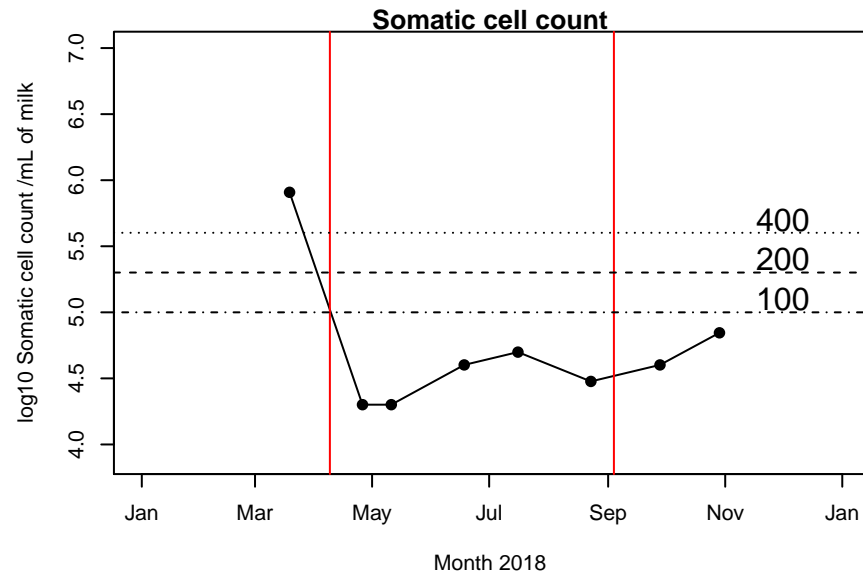

|                                    | # quarter | Sampling 1 | Sampling 2 |
|------------------------------------|-----------|------------|------------|
| <b>Aerococcus viridans</b>         | 3         | 7          | 2          |
| <b>Corynebacterium bovis</b>       | 1         | 0          | 1          |
| <b>Corynebacterium confusum</b>    | 1         | 0          | 1          |
| <b>Staphylococcus epidermidis</b>  | 1         | 1          | 0          |
| <b>Staphylococcus haemolyticus</b> | 1         | 0          | 1          |
| <b>Staphylococcus warneri</b>      | 1         | 2          | 0          |
